# Supplementary material
Source: PubMed Central journal article supplement (PMC9708662)
Supplement: 41423_2022_940_MOESM1_ESM.pdf [file 41423_2022_940_MOESM1_ESM.pdf]

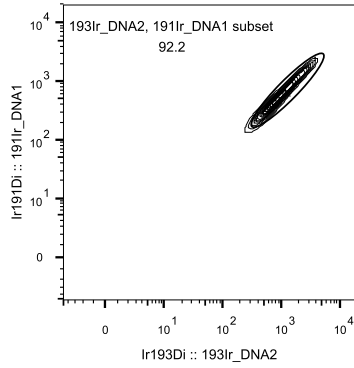

2447\_T019.fcs  
Ungated  
204675

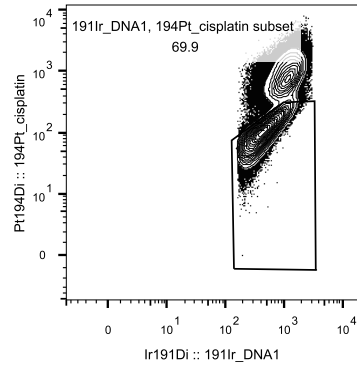

2447\_T019.fcs  
193Ir\_DNA2, 191Ir\_DNA1 subset  
188695

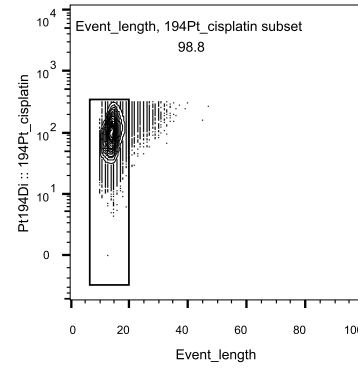

2447\_T019.fcs  
191Ir\_DNA1, 194Pt\_cisplatin subset  
131835

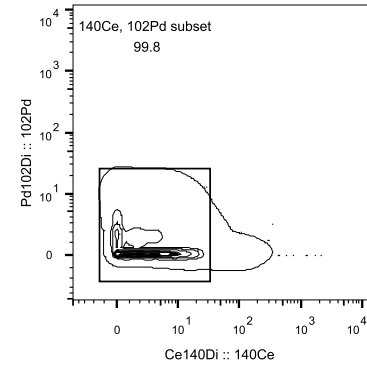

2447\_T019.fcs  
Event\_Length, 194Pt\_cisplatin subset  
130215

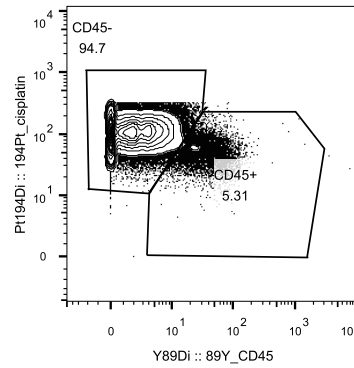

2447\_T019.fcs  
140Ce, 102Pd subset  
129986

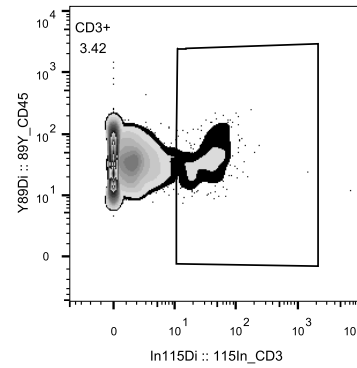

2447\_T019.fcs  
CD45+  
6905

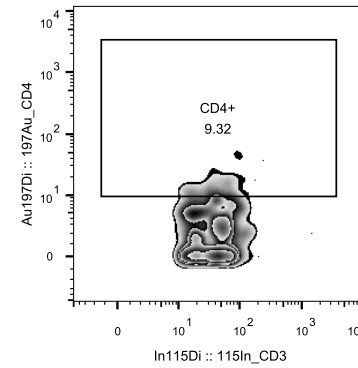

2447\_T019.fcs  
CD3+  
236

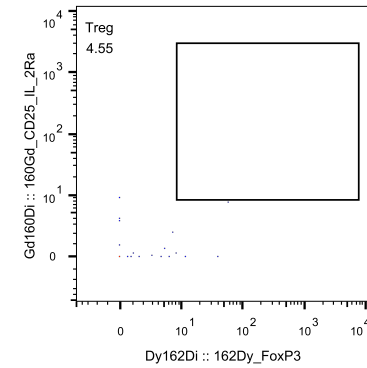

2447\_T019.fcs  
CD4+  
22.0

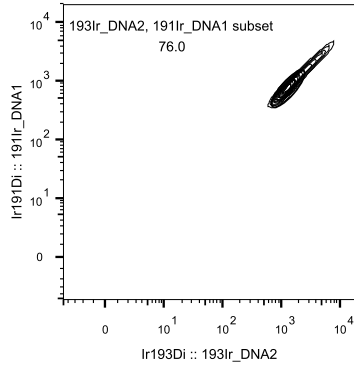

2447\_T020.fcs  
Ungated  
146903

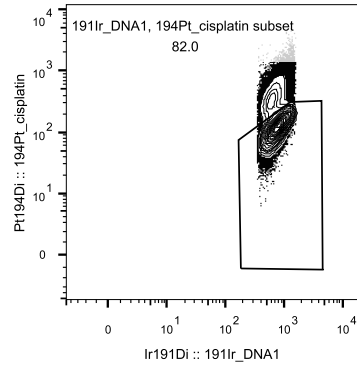

2447\_T020.fcs  
193Ir\_DNA2, 191Ir\_DNA1 subset  
111672

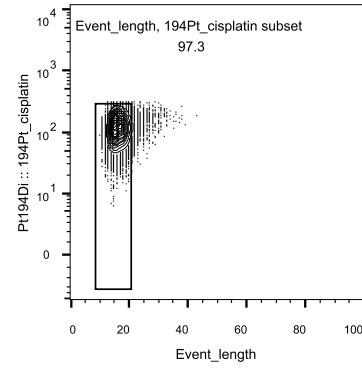

2447\_T020.fcs  
191Ir\_DNA1, 194Pt\_cisplatin subset  
91614

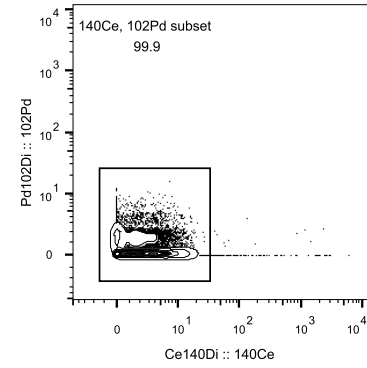

2447\_T020.fcs  
Event\_length, 194Pt\_cisplatin subset  
89164

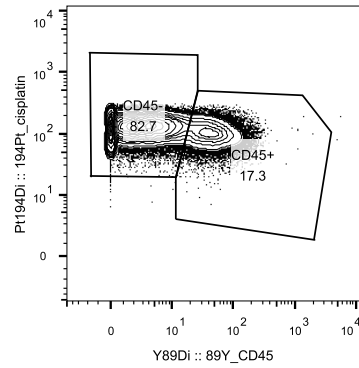

2447\_T020.fcs  
140Ce, 102Pd subset  
89050

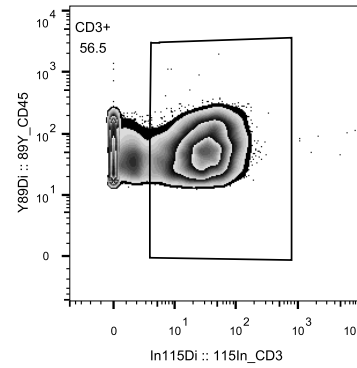

2447\_T020.fcs  
CD45+  
15382

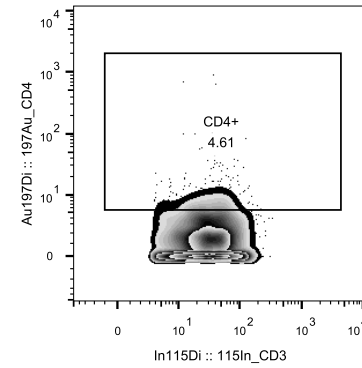

2447\_T020.fcs  
CD3+  
8692

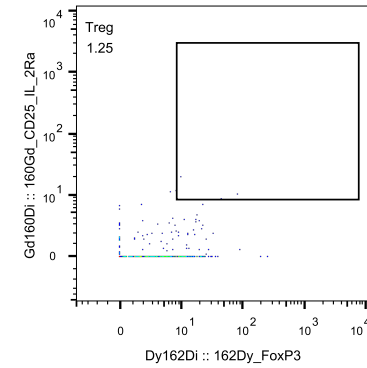

2447\_T020.fcs  
CD4+  
401

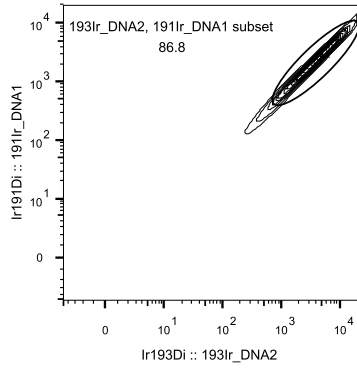

2471\_T023.fcs  
Ungated  
86160

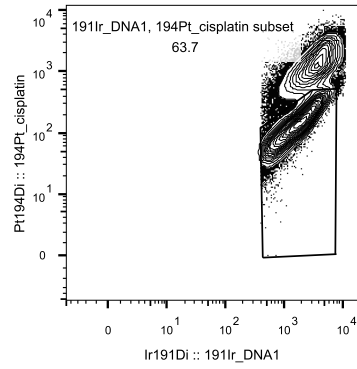

2471\_T023.fcs  
193Ir\_DNA2, 191Ir\_DNA1 subset  
74796

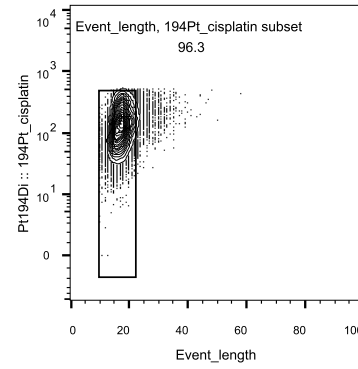

2471\_T023.fcs  
191Ir\_DNA1, 194Pt\_cisplatin subset  
47636

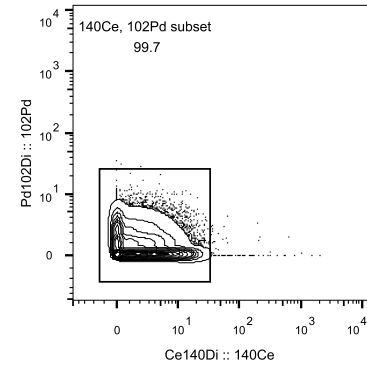

2471\_T023.fcs  
Event\_length, 194Pt\_cisplatin subset  
45884

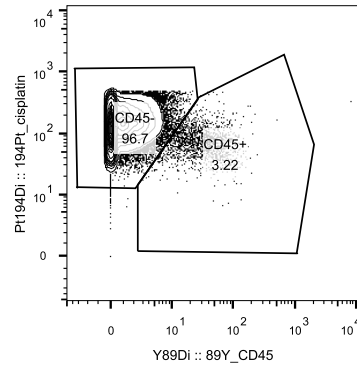

2471\_T023.fcs  
140Ce, 102Pd subset  
45738

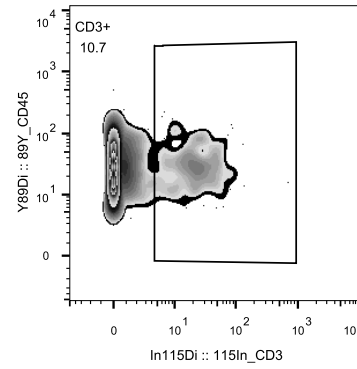

2471\_T023.fcs  
CD45+  
1474

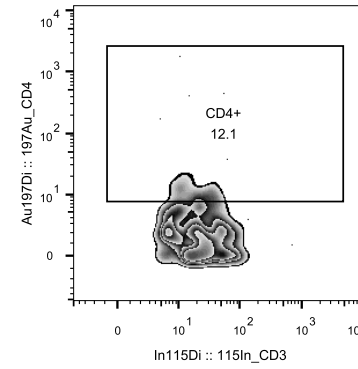

2471\_T023.fcs  
CD3+  
157

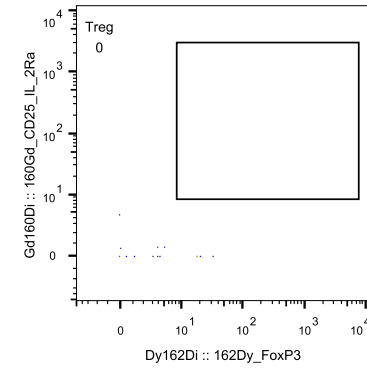

2471\_T023.fcs  
CD4+  
19.0

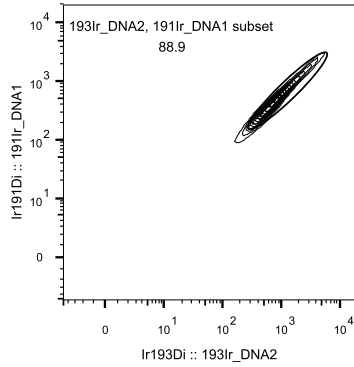

2471\_T024.fcs  
Ungated  
6.81E5

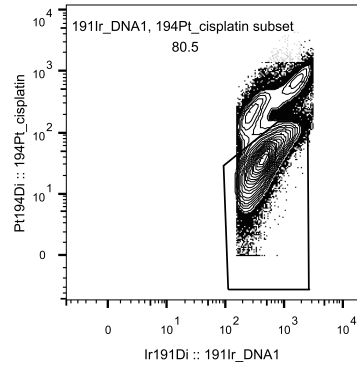

2471\_T024.fcs  
193Ir\_DNA2, 191Ir\_DNA1 subset  
6.06E5

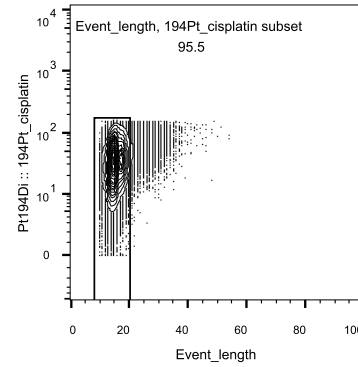

2471\_T024.fcs  
191Ir\_DNA1, 194Pt\_cisplatin subset  
4.87E5

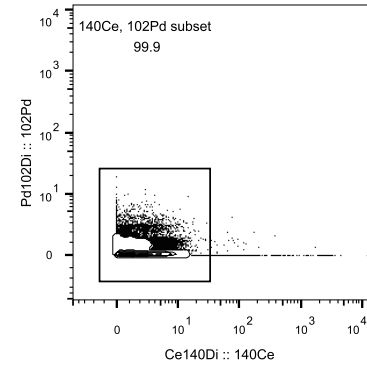

2471\_T024.fcs  
Event\_length, 194Pt\_cisplatin subset  
4.66E5

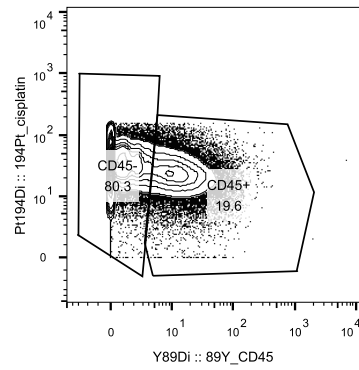

2471\_T024.fcs  
140Ce, 102Pd subset  
4.65E5

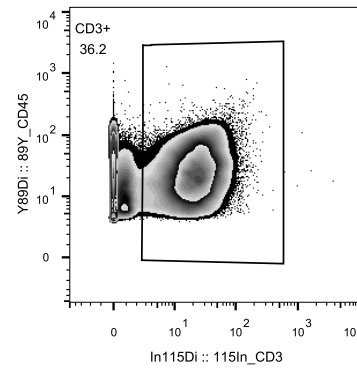

2471\_T024.fcs  
CD45+  
91009

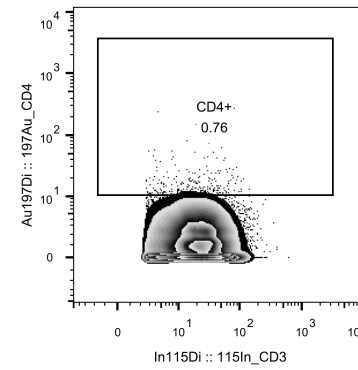

2471\_T024.fcs  
CD3+  
32949

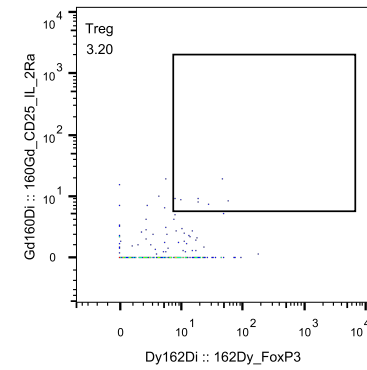

2471\_T024.fcs  
CD4+  
250



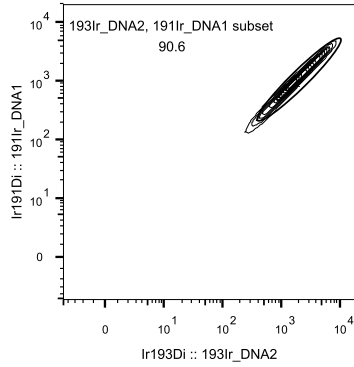

2598\_T027.fcs  
Ungated  
281710

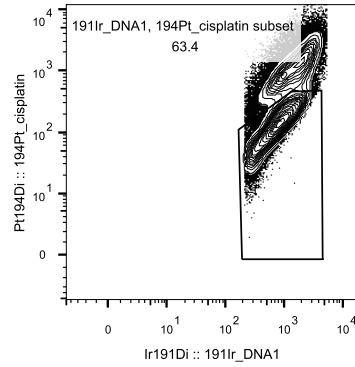

2598\_T027.fcs  
193Ir\_DNA2, 191Ir\_DNA1 subset  
255228

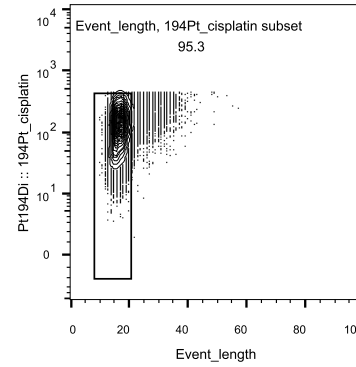

2598\_T027.fcs  
191Ir\_DNA1, 194Pt\_cisplatin subset  
161885

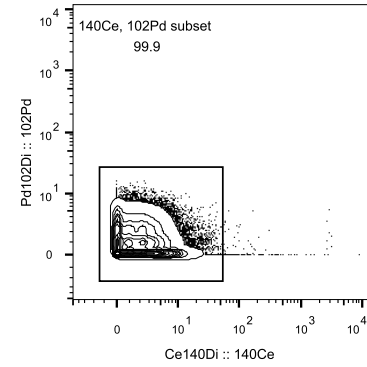

2598\_T027.fcs  
Event\_length, 194Pt\_cisplatin subset  
154340

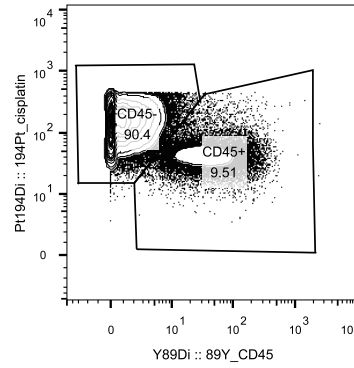

2598\_T027.fcs  
140Ce, 102Pd subset  
154212

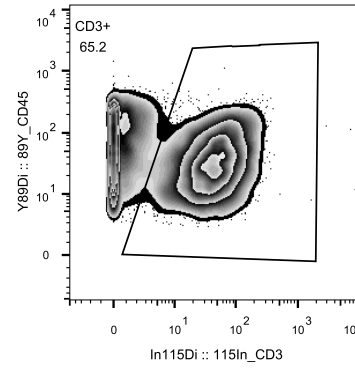

2598\_T027.fcs  
CD45+  
14664

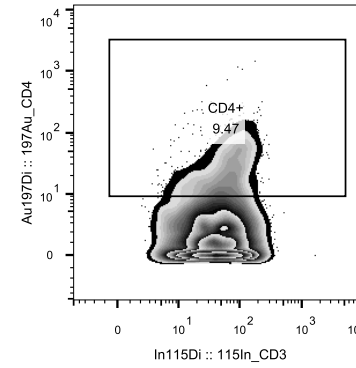

2598\_T027.fcs  
CD3+  
9557

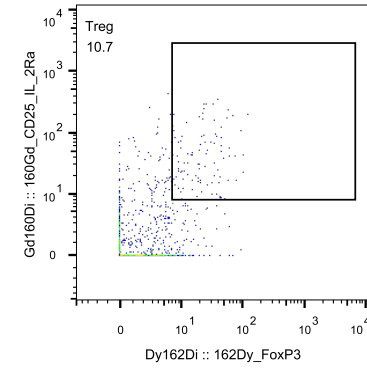

2598\_T027.fcs  
CD4+  
905

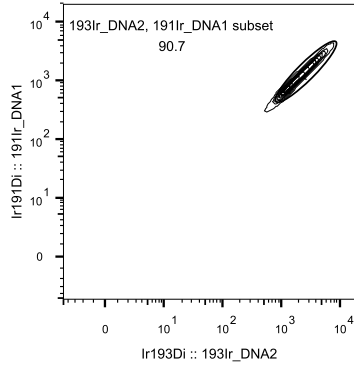

2598\_T028.fcs  
Ungated  
316427

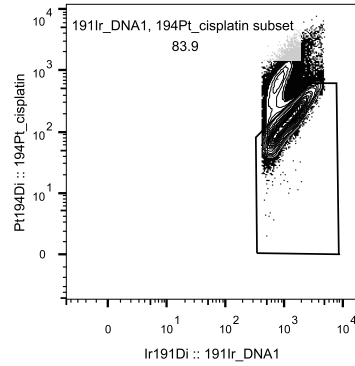

2598\_T028.fcs  
193Ir\_DNA2, 191Ir\_DNA1 subset  
286995

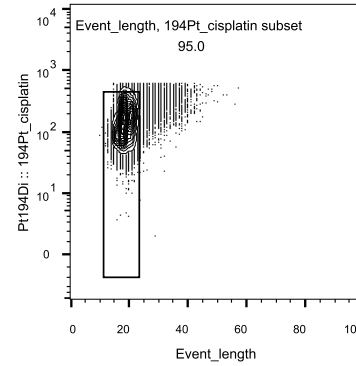

2598\_T028.fcs  
191Ir\_DNA1, 194Pt\_cisplatin subset  
240654

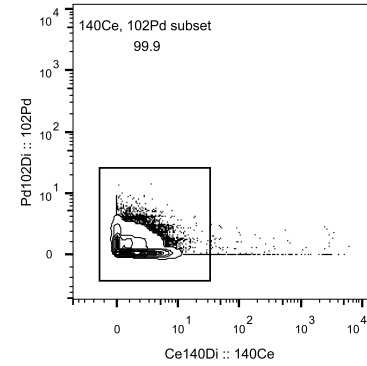

2598\_T028.fcs  
Event\_length, 194Pt\_cisplatin subset  
228614

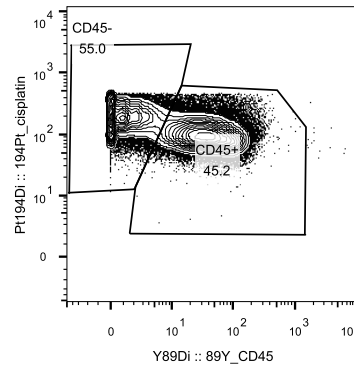

2598\_T028.fcs  
140Ce, 102Pd subset  
228372

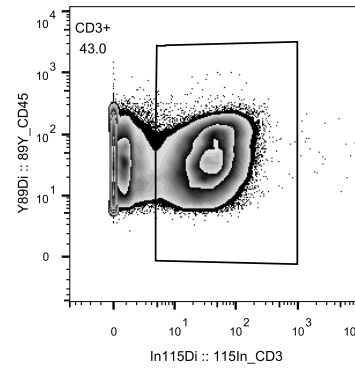

2598\_T028.fcs  
CD45+  
103112

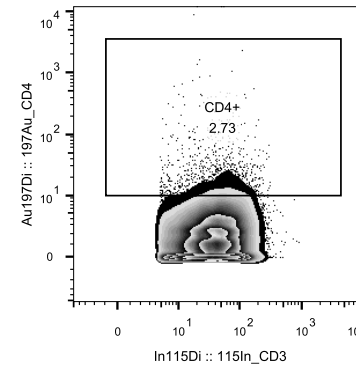

2598\_T028.fcs  
CD3+  
44367

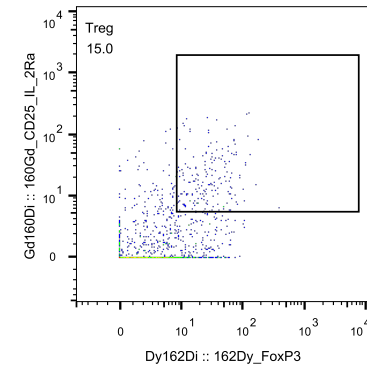

2598\_T028.fcs  
CD4+  
1211

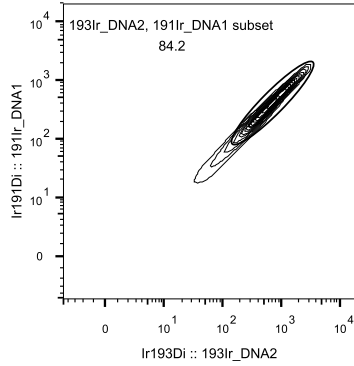

2788\_T031.fcs  
Ungated  
5.98E5

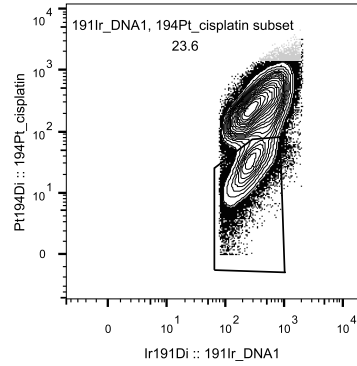

2788\_T031.fcs  
193Ir\_DNA2, 191Ir\_DNA1 subset  
5.03E5

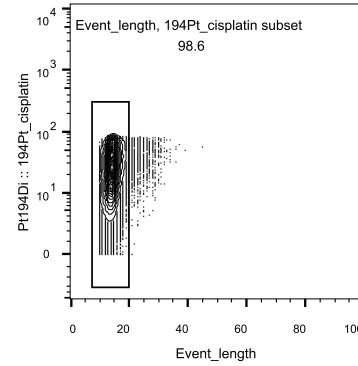

2788\_T031.fcs  
191Ir\_DNA1, 194Pt\_cisplatin subset  
118600

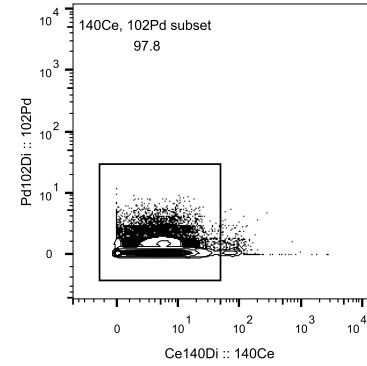

2788\_T031.fcs  
Event\_length, 194Pt\_cisplatin subset  
116982

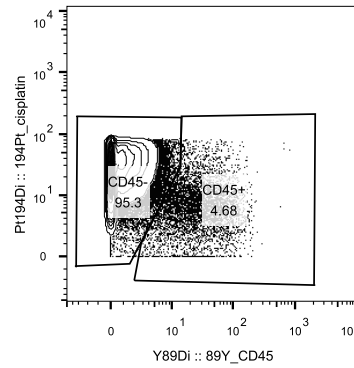

2788\_T031.fcs  
140Ce, 102Pd subset  
114367

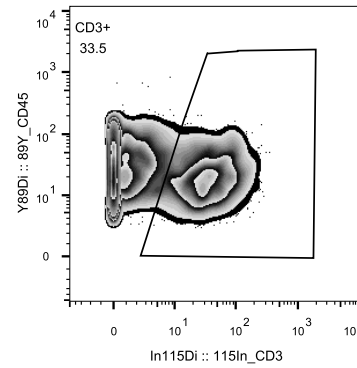

2788\_T031.fcs  
CD45+  
5356

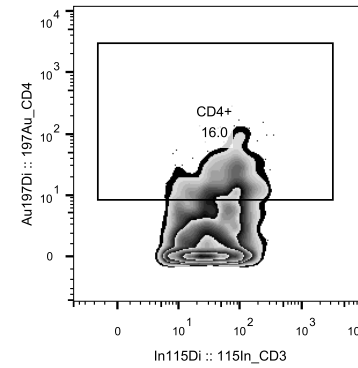

2788\_T031.fcs  
CD3+  
1793

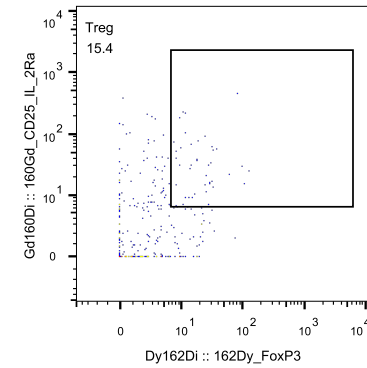

2788\_T031.fcs  
CD4+  
286

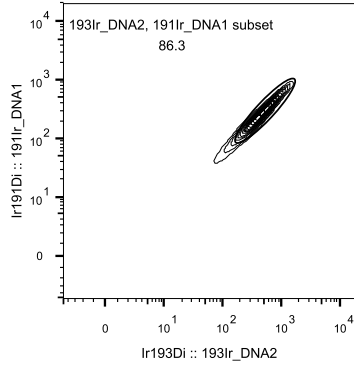

2789\_T032.fcs  
Ungated  
5.70E5

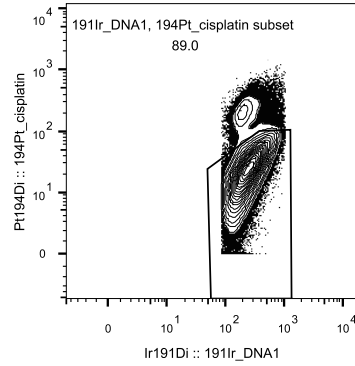

2789\_T032.fcs  
193Ir\_DNA2, 191Ir\_DNA1 subset  
4.92E5

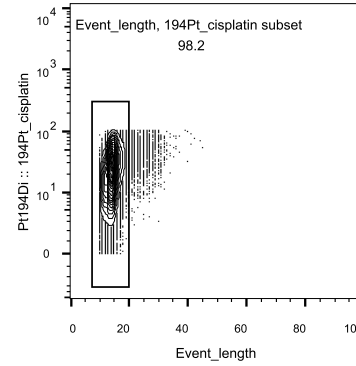

2789\_T032.fcs  
191Ir\_DNA1, 194Pt\_cisplatin subset  
4.38E5

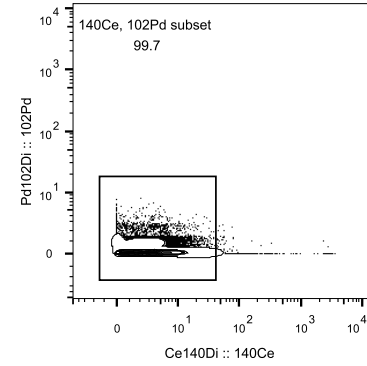

2789\_T032.fcs  
Event\_length, 194Pt\_cisplatin subset  
4.30E5

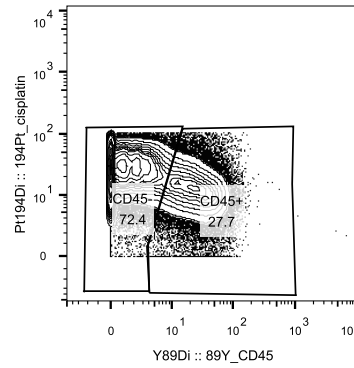

2789\_T032.fcs  
140Ce, 102Pd subset  
4.29E5

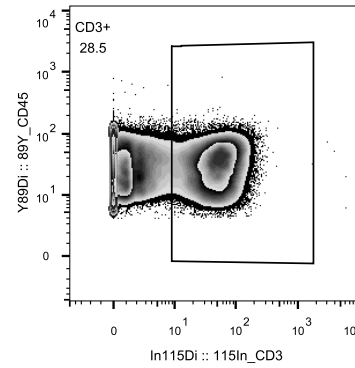

2789\_T032.fcs  
CD45+  
118939

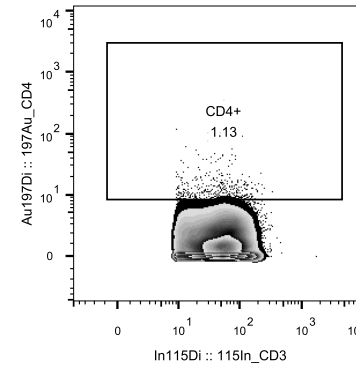

2789\_T032.fcs  
CD3+  
33940

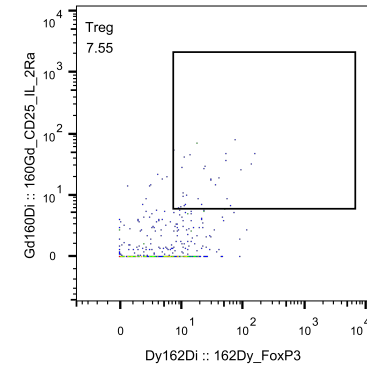

2789\_T032.fcs  
CD4+  
384

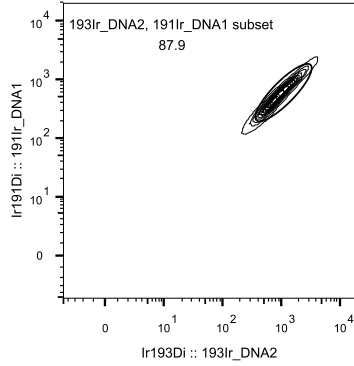

2789\_T044.fcs  
Ungated  
196243

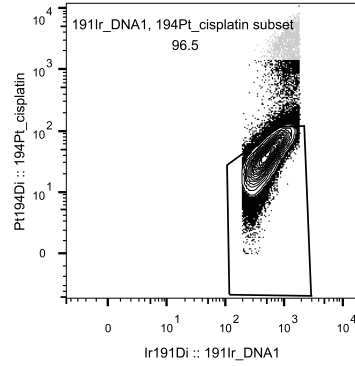

2789\_T044.fcs  
193Ir\_DNA2, 191Ir\_DNA1 subset  
172436

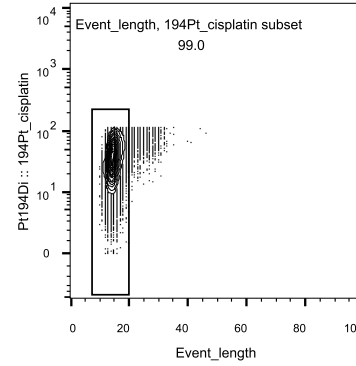

2789\_T044.fcs  
191Ir\_DNA1, 194Pt\_cisplatin subset  
166451

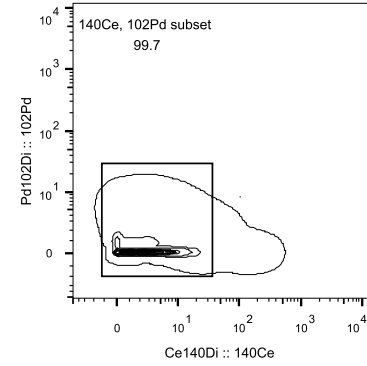

2789\_T044.fcs  
Event\_length, 194Pt\_cisplatin subset  
164863

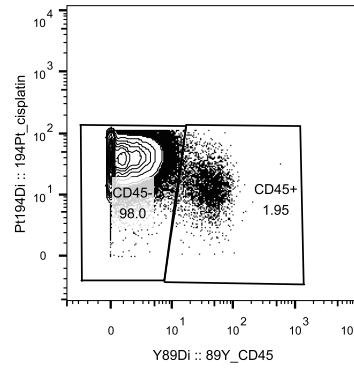

2789\_T044.fcs  
140Ce, 102Pd subset  
164428

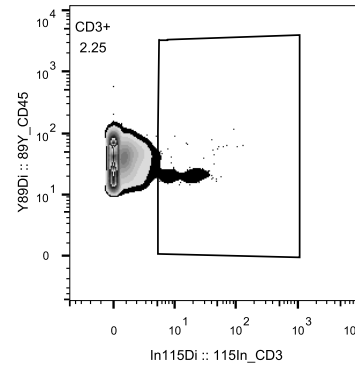

2789\_T044.fcs  
CD45+  
3199

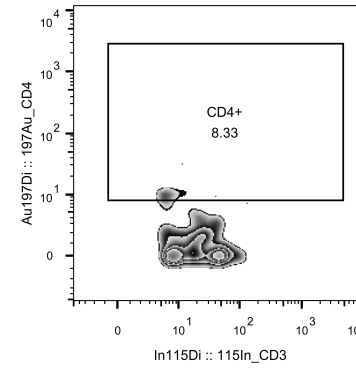

2789\_T044.fcs  
CD3+  
72.0

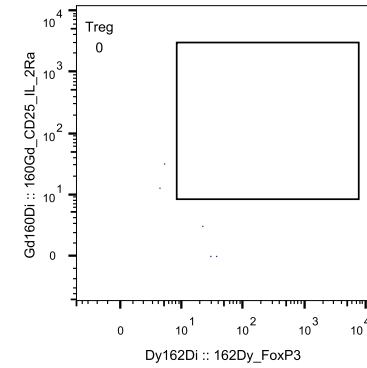

2789\_T044.fcs  
CD4+  
6.00

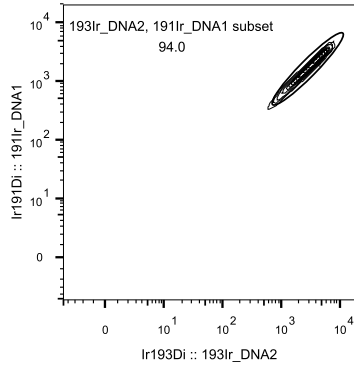

2790\_T033.fcs  
Ungated  
191069

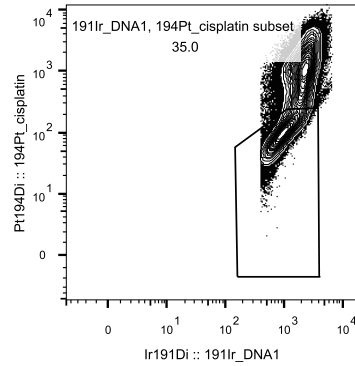

2790\_T033.fcs  
193Ir\_DNA2, 191Ir\_DNA1 subset  
179585

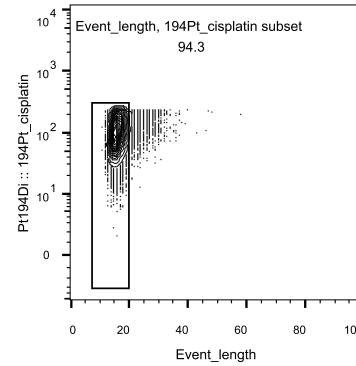

2790\_T033.fcs  
191Ir\_DNA1, 194Pt\_cisplatin subset  
62907

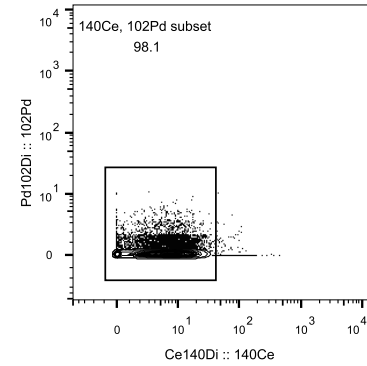

2790\_T033.fcs  
Event\_length, 194Pt\_cisplatin subset  
59322

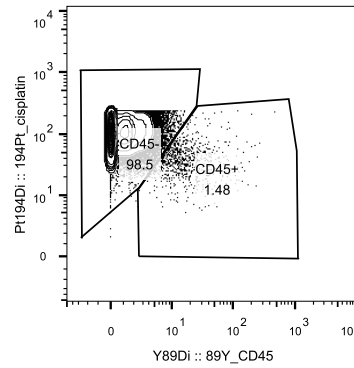

2790\_T033.fcs  
140Ce, 102Pd subset  
58207

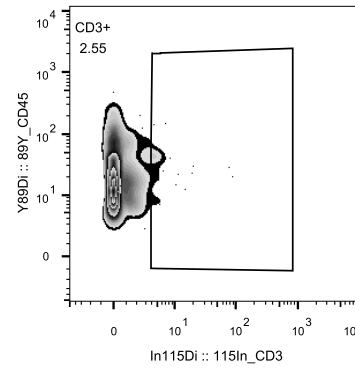

2790\_T033.fcs  
CD45+  
863

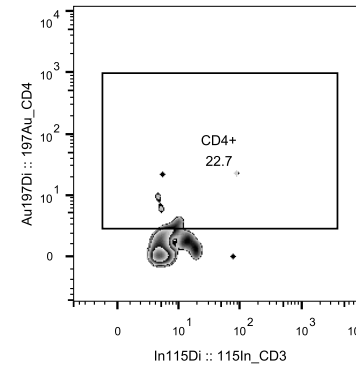

2790\_T033.fcs  
CD3+  
22.0

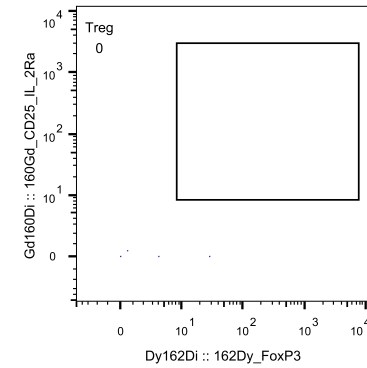

2790\_T033.fcs  
CD4+  
5.00

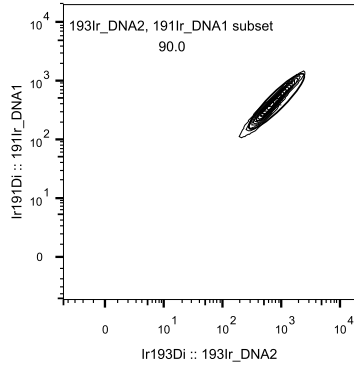

2790\_T034.fcs  
Ungated  
1.31E6

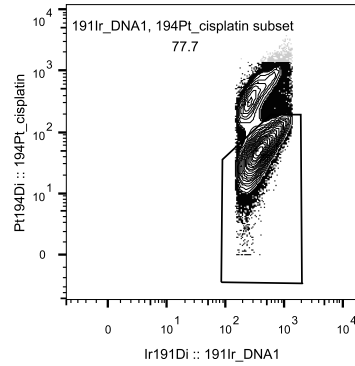

2790\_T034.fcs  
193Ir\_DNA2, 191Ir\_DNA1 subset  
1.17E6

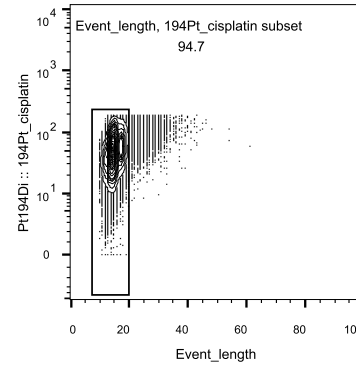

2790\_T034.fcs  
191Ir\_DNA1, 194Pt\_cisplatin subset  
9.13E5

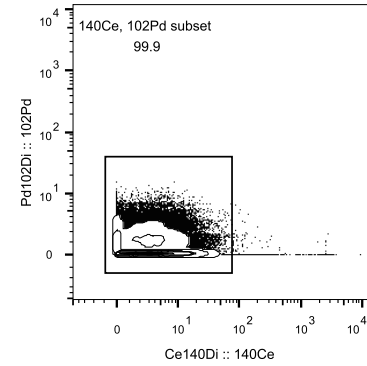

2790\_T034.fcs  
Event\_length, 194Pt\_cisplatin subset  
8.65E5

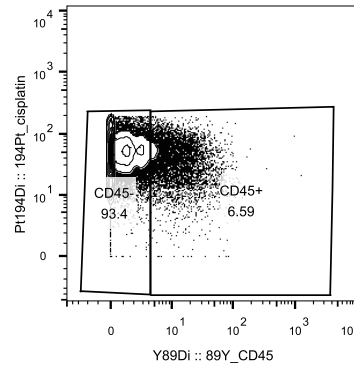

2790\_T034.fcs  
140Ce, 102Pd subset  
8.64E5

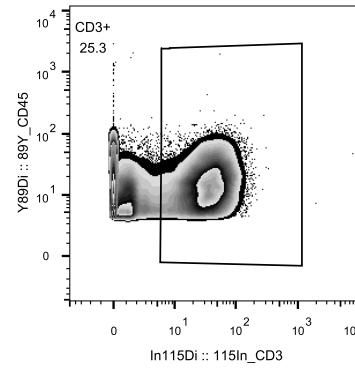

2790\_T034.fcs  
CD45+  
56897

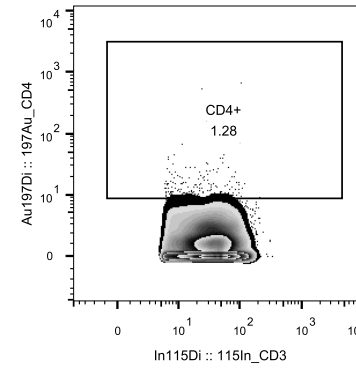

2790\_T034.fcs  
CD3+  
14397

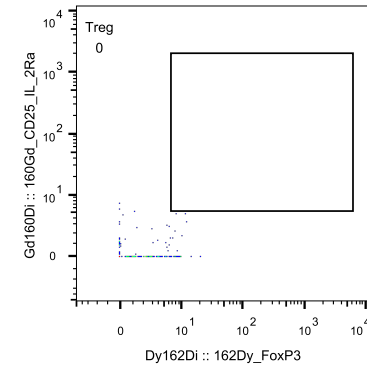

2790\_T034.fcs  
CD4+  
185

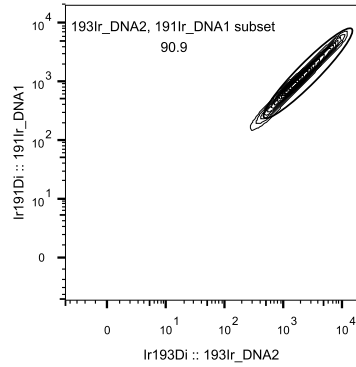

2791\_T037.fcs  
Ungated  
115135

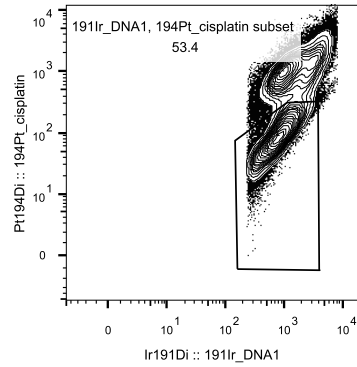

2791\_T037.fcs  
193Ir\_DNA2, 191Ir\_DNA1 subset  
104623

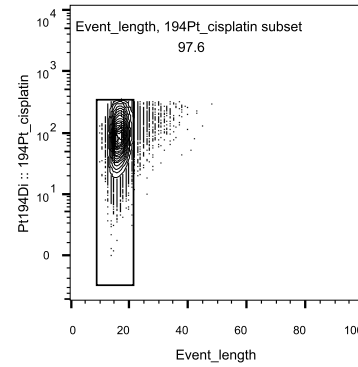

2791\_T037.fcs  
191Ir\_DNA1, 194Pt\_cisplatin subset  
55867

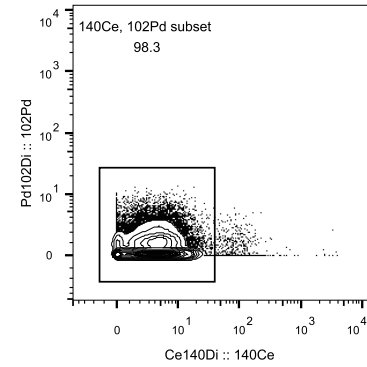

2791\_T037.fcs  
Event\_length, 194Pt\_cisplatin subset  
54542

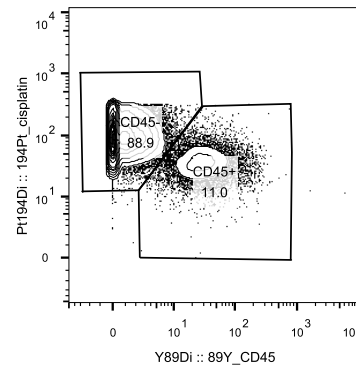

2791\_T037.fcs  
140Ce, 102Pd subset  
53625

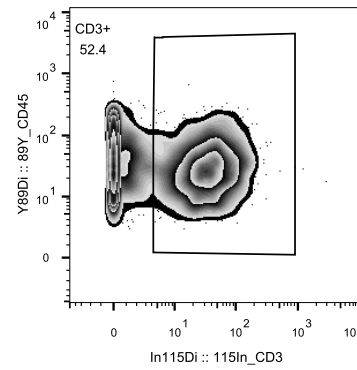

2791\_T037.fcs  
CD45+  
5920

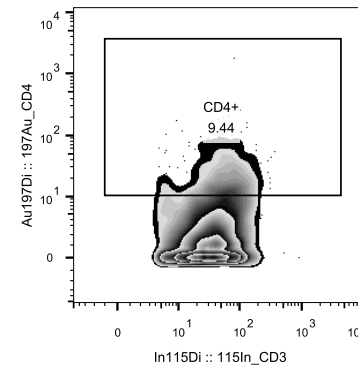

2791\_T037.fcs  
CD3+  
3104

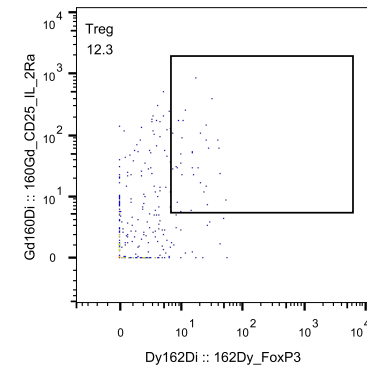

2791\_T037.fcs  
CD4+  
293



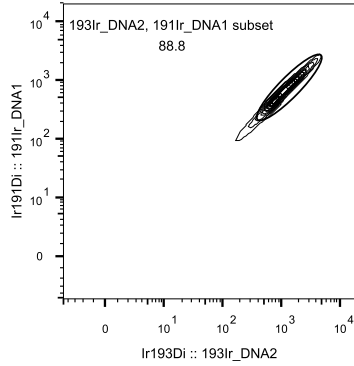

2791\_T038.fcs  
Ungated  
369556

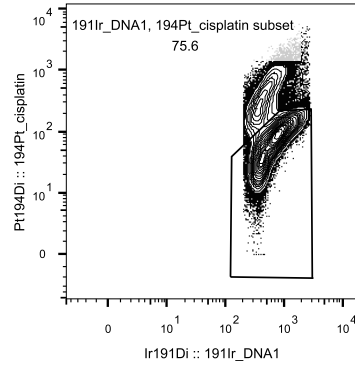

2791\_T038.fcs  
193Ir\_DNA2, 191Ir\_DNA1 subset  
328290

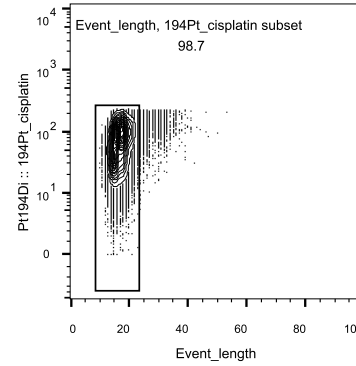

2791\_T038.fcs  
191Ir\_DNA1, 194Pt\_cisplatin subset  
248094

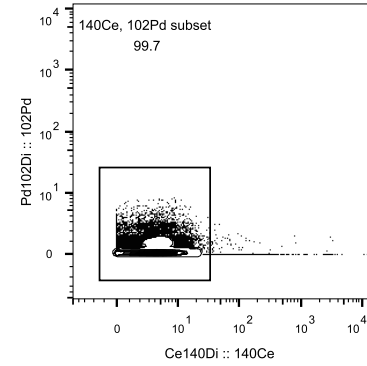

2791\_T038.fcs  
Event\_length, 194Pt\_cisplatin subset  
244923

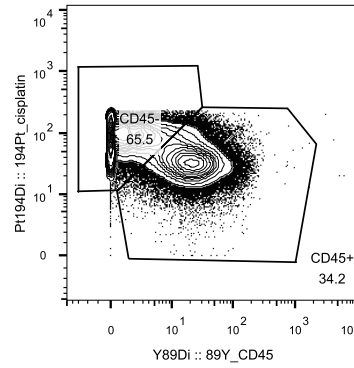

2791\_T038.fcs  
140Ce, 102Pd subset  
244190

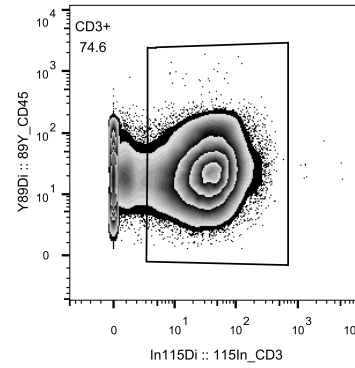

2791\_T038.fcs  
CD45+  
83566

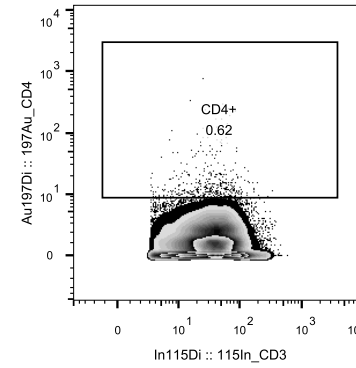

2791\_T038.fcs  
CD3+  
62320

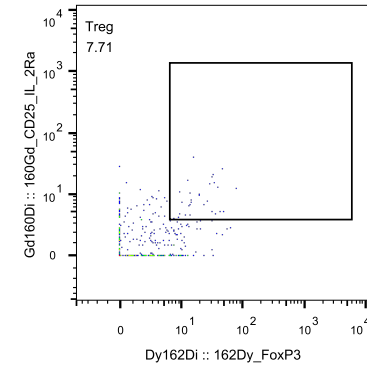

2791\_T038.fcs  
CD4+  
389

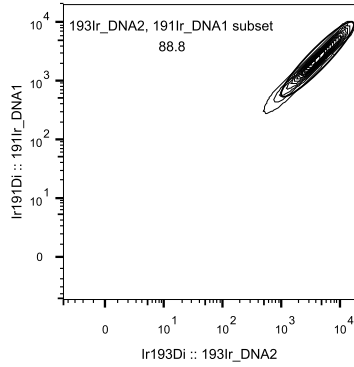

2791\_T039.fcs  
Ungated  
39239

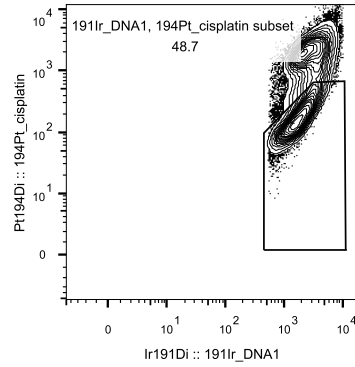

2791\_T039.fcs  
193Ir\_DNA2, 191Ir\_DNA1 subset  
34836

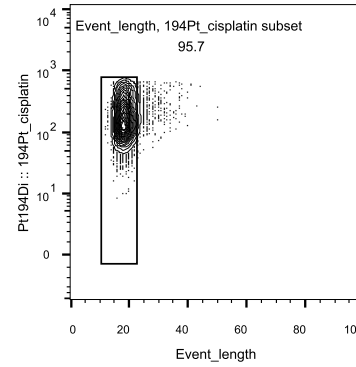

2791\_T039.fcs  
191Ir\_DNA1, 194Pt\_cisplatin subset  
16951

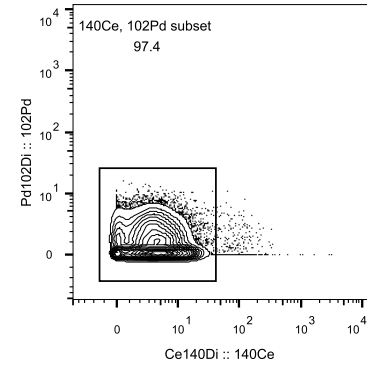

2791\_T039.fcs  
Event\_length, 194Pt\_cisplatin subset  
16224

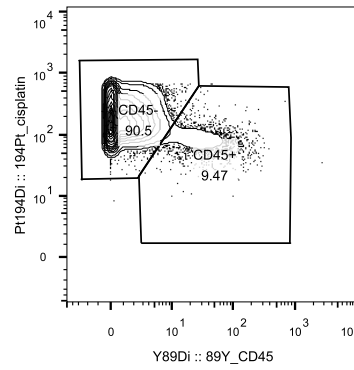

2791\_T039.fcs  
140Ce, 102Pd subset  
15808

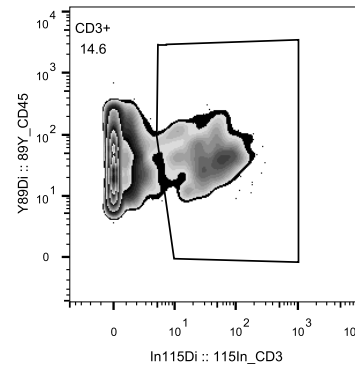

2791\_T039.fcs  
CD45+  
1497

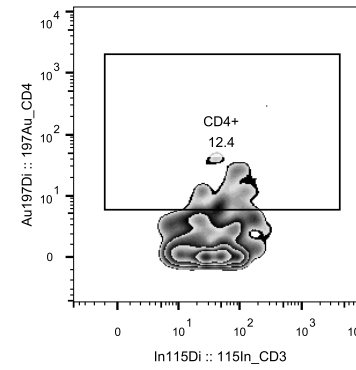

2791\_T039.fcs  
CD3+  
218

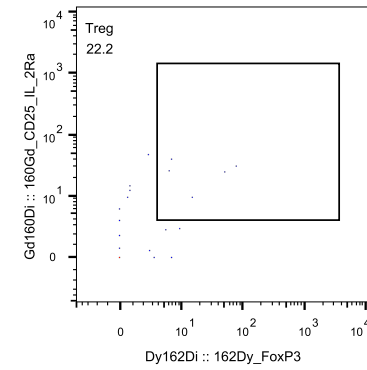

2791\_T039.fcs  
CD4+  
27.0

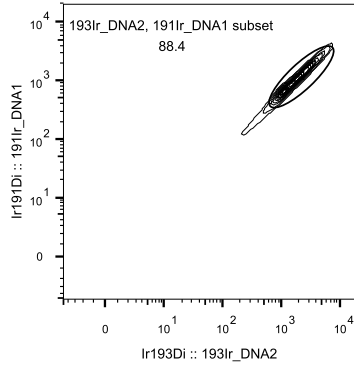

2791\_T040.fcs  
Ungated  
211682

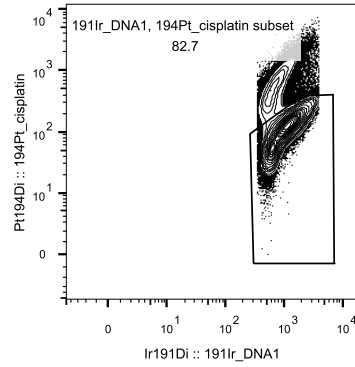

2791\_T040.fcs  
193Ir\_DNA2, 191Ir\_DNA1 subset  
187040

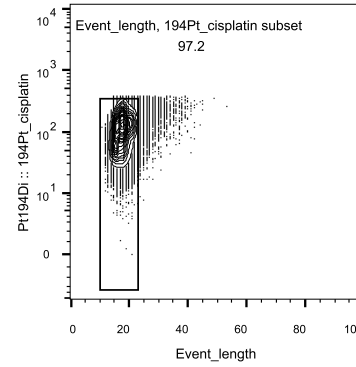

2791\_T040.fcs  
191Ir\_DNA1, 194Pt\_cisplatin subset  
154742

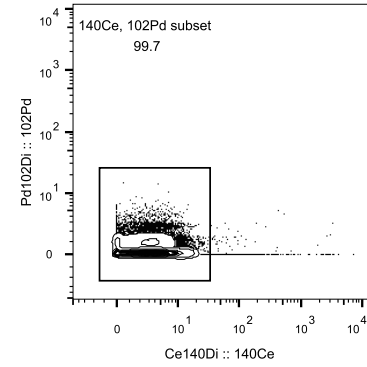

2791\_T040.fcs  
Event\_length, 194Pt\_cisplatin subset  
150463

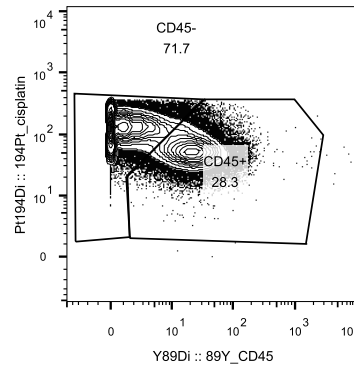

2791\_T040.fcs  
140Ce, 102Pd subset  
150019

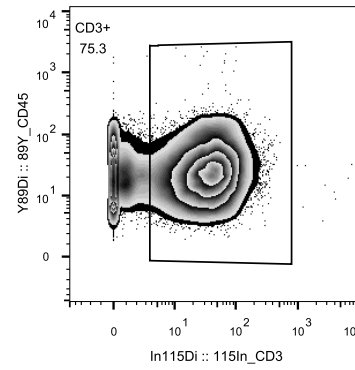

2791\_T040.fcs  
CD45+  
42429

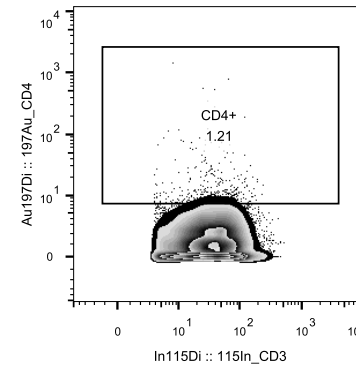

2791\_T040.fcs  
CD3+  
31928

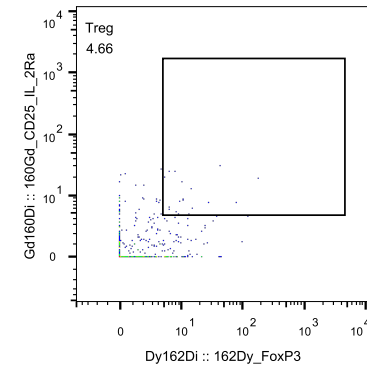

2791\_T040.fcs  
CD4+  
386

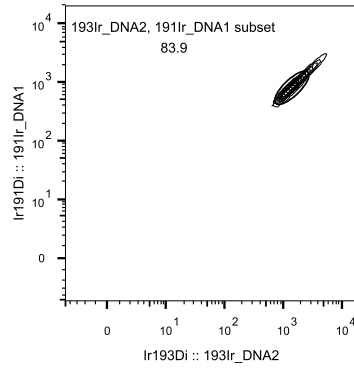

2791\_T043.fcs  
Ungated  
357002

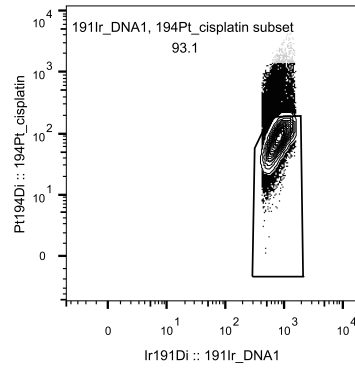

2791\_T043.fcs  
193Ir\_DNA2, 191Ir\_DNA1 subset  
299574

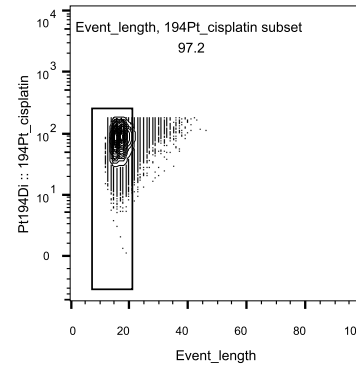

2791\_T043.fcs  
191Ir\_DNA1, 194Pt\_cisplatin subset  
279002

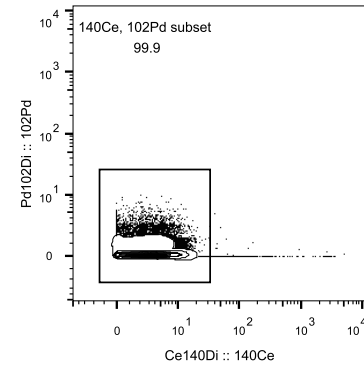

2791\_T043.fcs  
Event\_length, 194Pt\_cisplatin subset  
271131

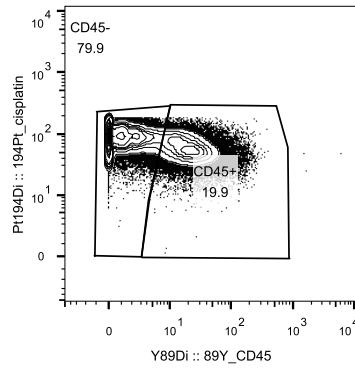

2791\_T043.fcs  
140Ce, 102Pd subset  
270855

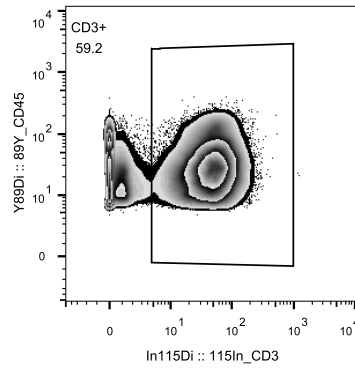

2791\_T043.fcs  
CD45+  
53918

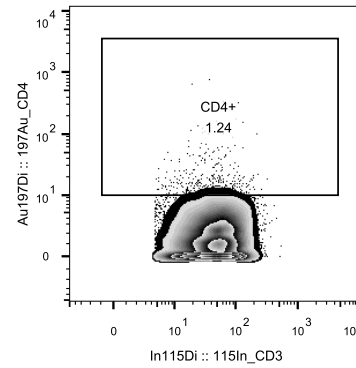

2791\_T043.fcs  
CD3+  
31920

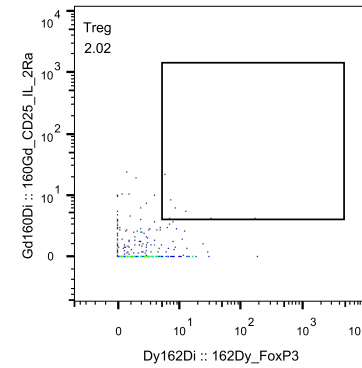

2791\_T043.fcs  
CD4+  
397

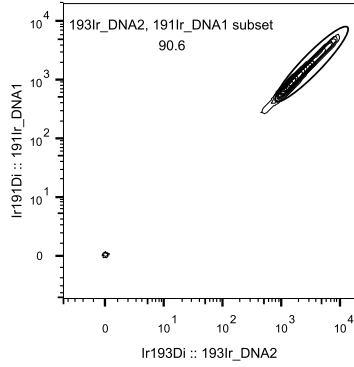

2905\_T045.fcs  
Ungated  
314106

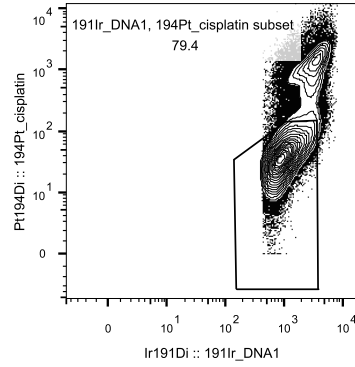

2905\_T045.fcs  
193Ir\_DNA2, 191Ir\_DNA1 subset  
284472

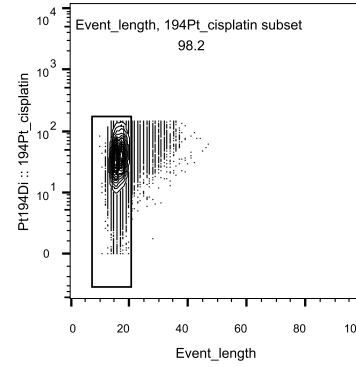

2905\_T045.fcs  
191Ir\_DNA1, 194Pt\_cisplatin subset  
226004

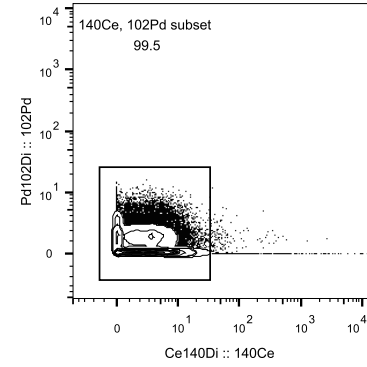

2905\_T045.fcs  
Event\_length, 194Pt\_cisplatin subset  
221914

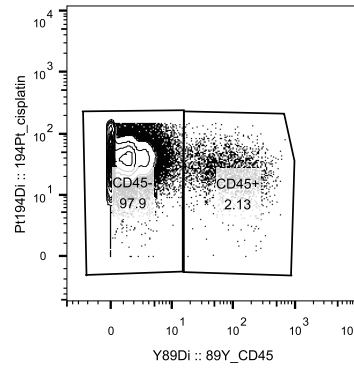

2905\_T045.fcs  
140Ce, 102Pd subset  
220721

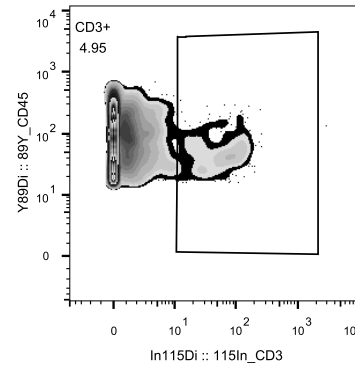

2905\_T045.fcs  
CD45+  
4706

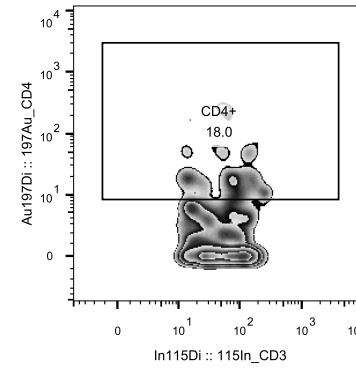

2905\_T045.fcs  
CD3+  
233

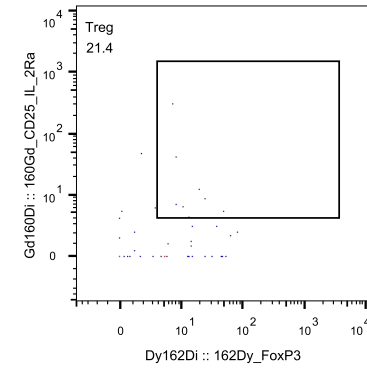

2905\_T045.fcs  
CD4+  
42.0

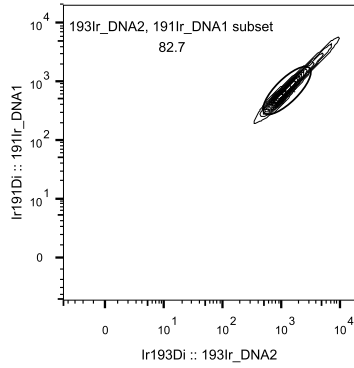

2905\_T046.fcs  
Ungated  
330082

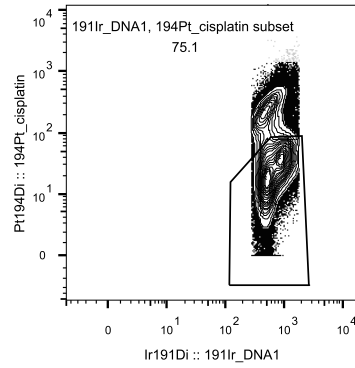

2905\_T046.fcs  
193Ir\_DNA2, 191Ir\_DNA1 subset  
273056

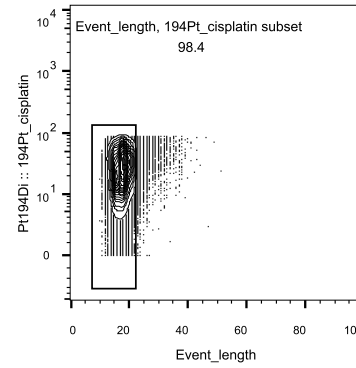

2905\_T046.fcs  
191Ir\_DNA1, 194Pt\_cisplatin subset  
205179

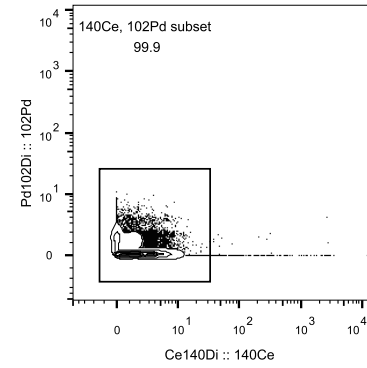

2905\_T046.fcs  
Event\_length, 194Pt\_cisplatin subset  
201882

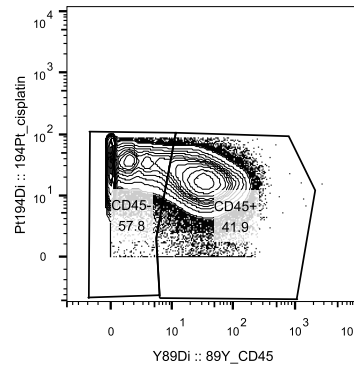

2905\_T046.fcs  
140Ce, 102Pd subset  
201656

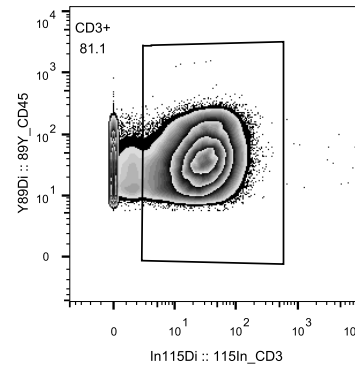

2905\_T046.fcs  
CD45+  
84570

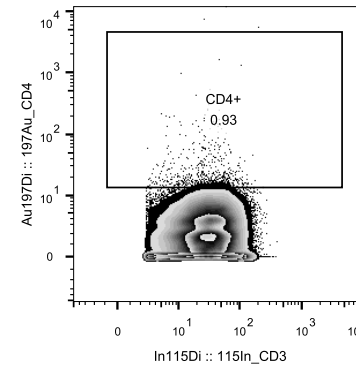

2905\_T046.fcs  
CD3+  
68591

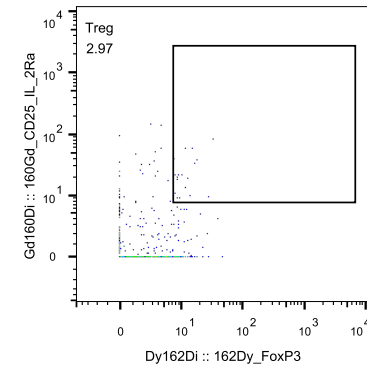

2905\_T046.fcs  
CD4+  
639

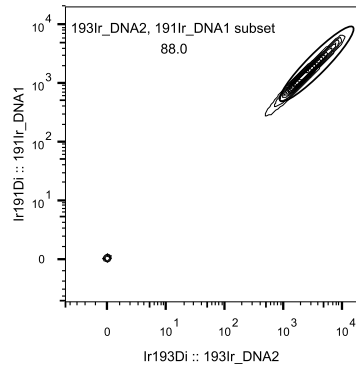

2905\_T047.fcs  
Ungated  
225499

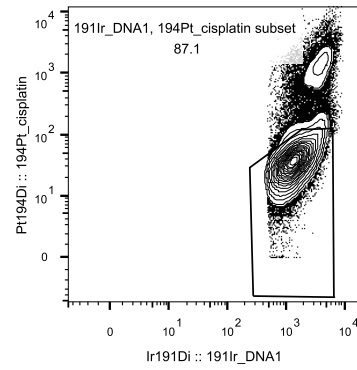

2905\_T047.fcs  
193Ir\_DNA2, 191Ir\_DNA1 subset  
198443

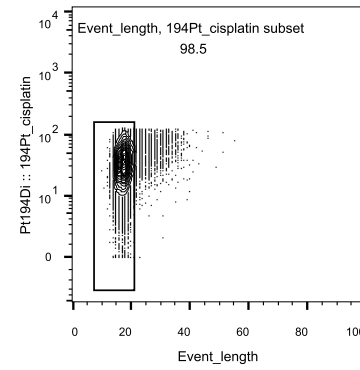

2905\_T047.fcs  
191Ir\_DNA1, 194Pt\_cisplatin subset  
172904

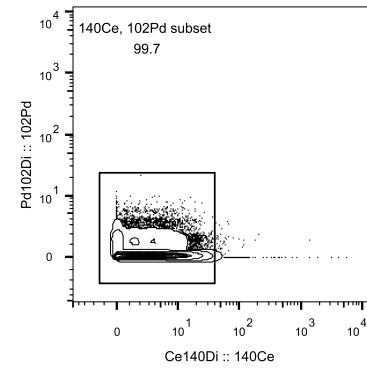

2905\_T047.fcs  
Event\_length, 194Pt\_cisplatin subset  
170326

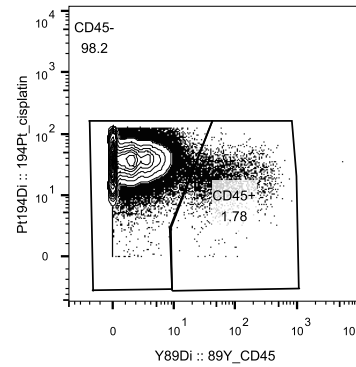

2905\_T047.fcs  
140Ce, 102Pd subset  
169749

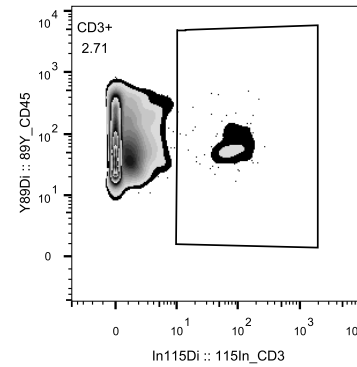

2905\_T047.fcs  
CD45+  
3028

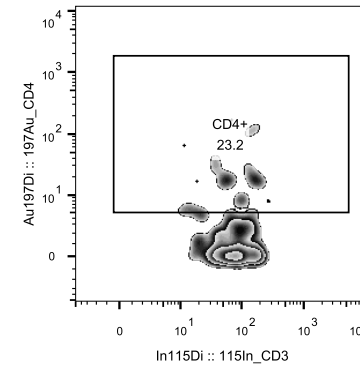

2905\_T047.fcs  
CD3+  
82.0

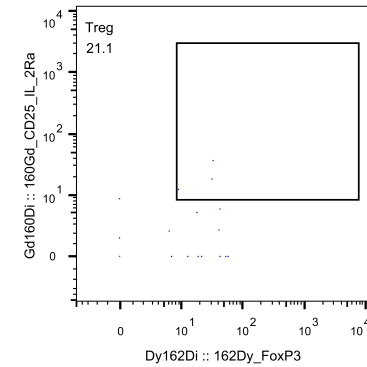

2905\_T047.fcs  
CD4+  
19.0

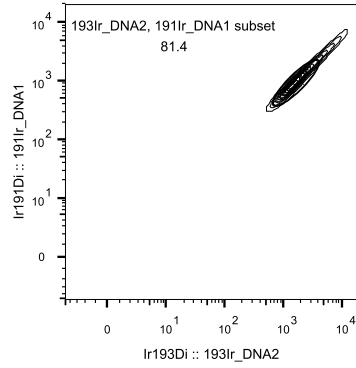

2905\_T048.fcs  
Ungated  
186693

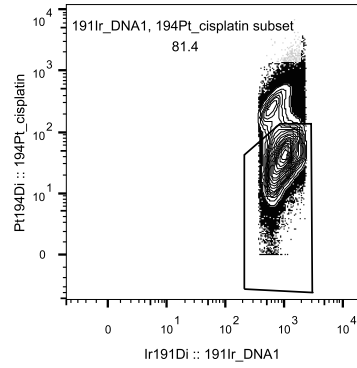

2905\_T048.fcs  
193Ir\_DNA2, 191Ir\_DNA1 subset  
151969

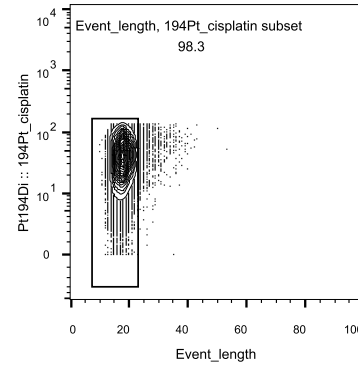

2905\_T048.fcs  
191Ir\_DNA1, 194Pt\_cisplatin subset  
123680

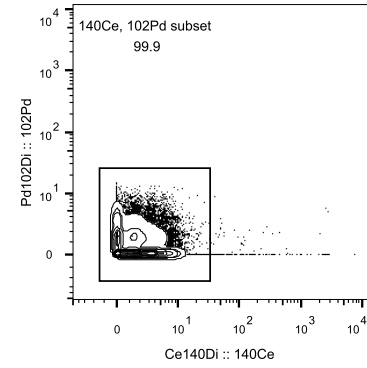

2905\_T048.fcs  
Event\_length, 194Pt\_cisplatin subset  
121577

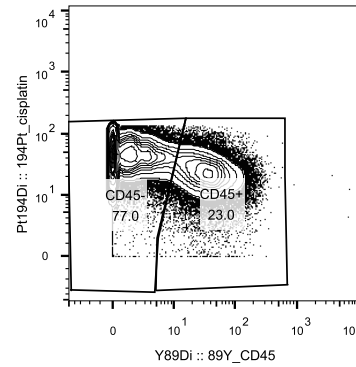

2905\_T048.fcs  
140Ce, 102Pd subset  
121405

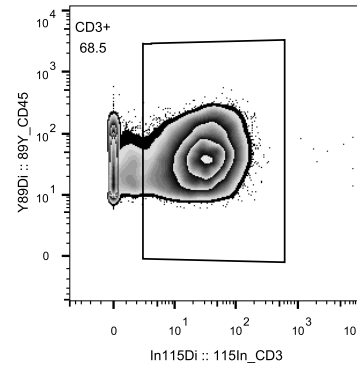

2905\_T048.fcs  
CD45+  
27878

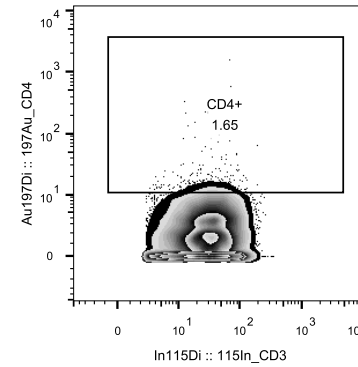

2905\_T048.fcs  
CD3+  
19094

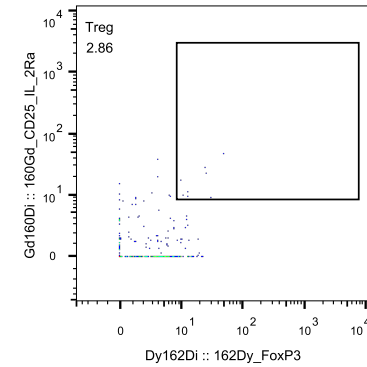

2905\_T048.fcs  
CD4+  
315



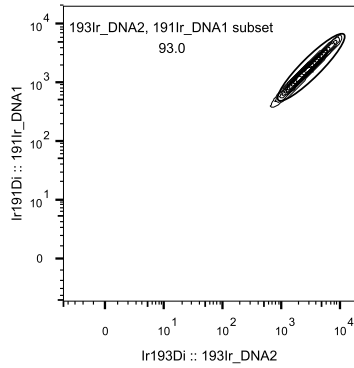

2905\_T049.fcs  
Ungated  
220673

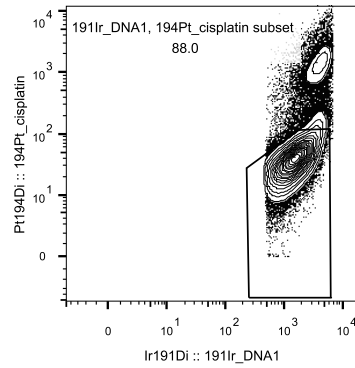

2905\_T049.fcs  
193Ir\_DNA2, 191Ir\_DNA1 subset  
205221

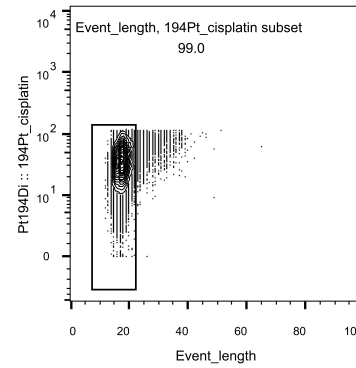

2905\_T049.fcs  
191Ir\_DNA1, 194Pt\_cisplatin subset  
180546

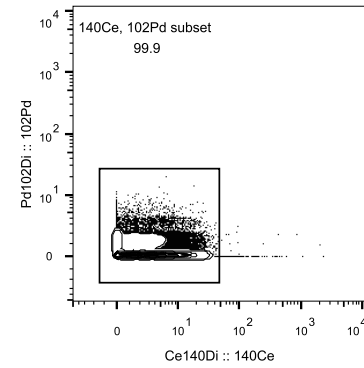

2905\_T049.fcs  
Event\_length, 194Pt\_cisplatin subset  
178712

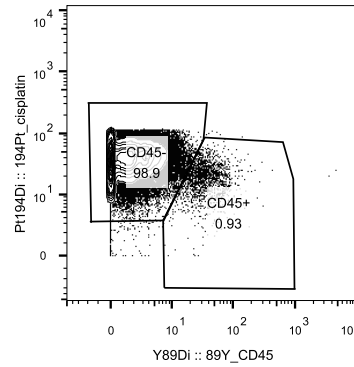

2905\_T049.fcs  
140Ce, 102Pd subset  
178535

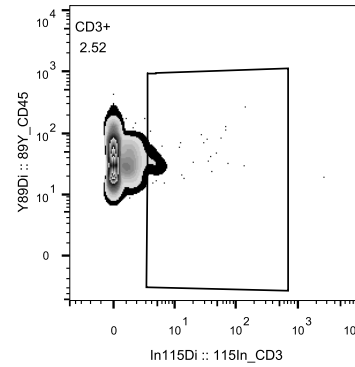

2905\_T049.fcs  
CD45+  
1664

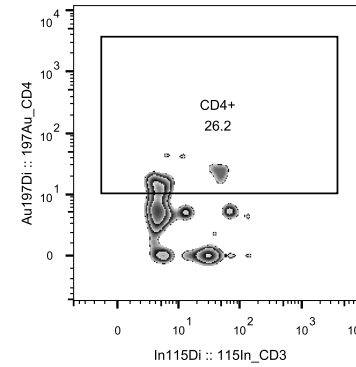

2905\_T049.fcs  
CD3+  
42.0

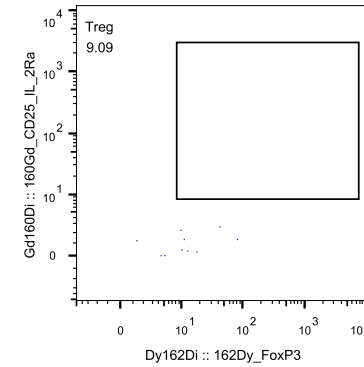

2905\_T049.fcs  
CD4+  
11.0

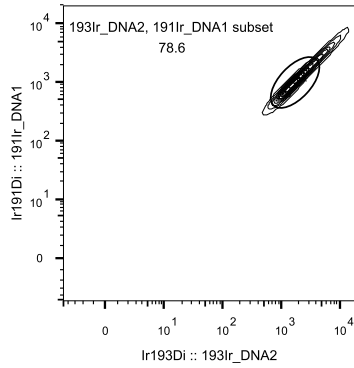

2905\_T050.fcs  
Ungated  
156121

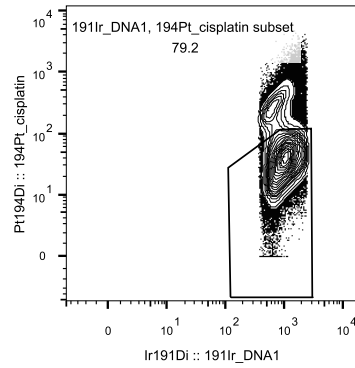

2905\_T050.fcs  
193Ir\_DNA2, 191Ir\_DNA1 subset  
122689

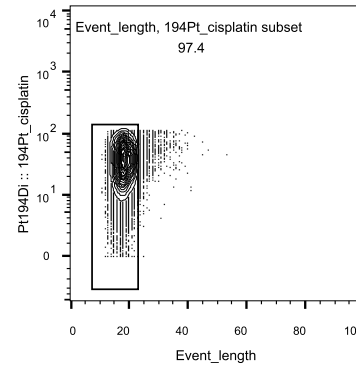

2905\_T050.fcs  
191Ir\_DNA1, 194Pt\_cisplatin subset  
97212

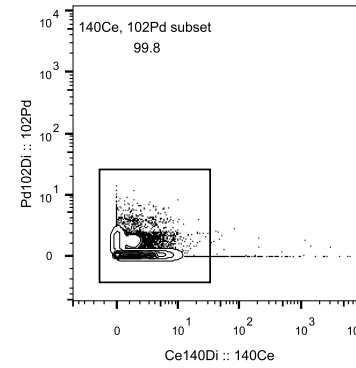

2905\_T050.fcs  
Event\_length, 194Pt\_cisplatin subset  
94731

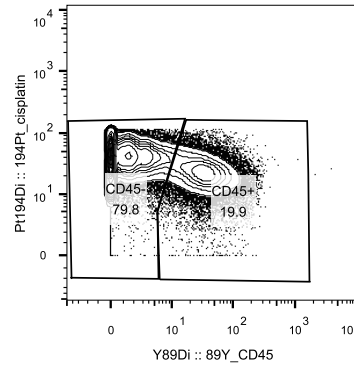

2905\_T050.fcs  
140Ce, 102Pd subset  
94573

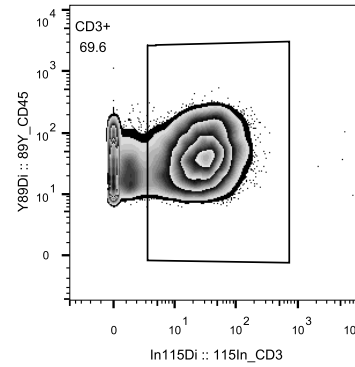

2905\_T050.fcs  
CD45+  
18858

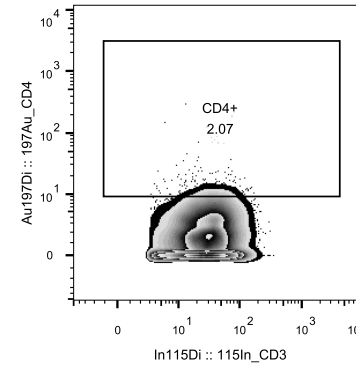

2905\_T050.fcs  
CD3+  
13119

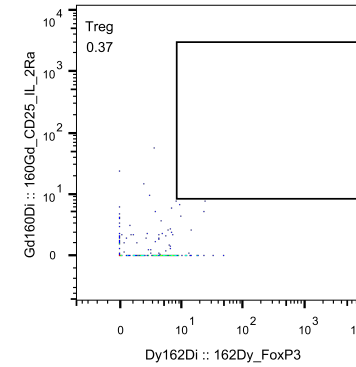

2905\_T050.fcs  
CD4+  
272

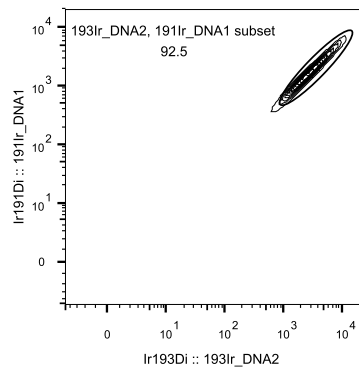

2905\_T051.fcs  
Ungated  
172433

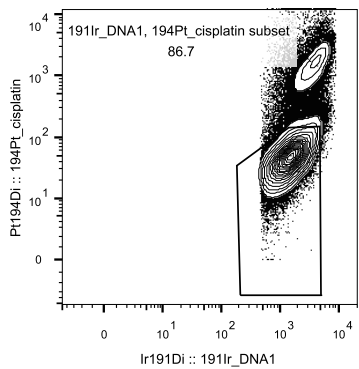

2905\_T051.fcs  
193Ir\_DNA2, 191Ir\_DNA1 subset  
159530

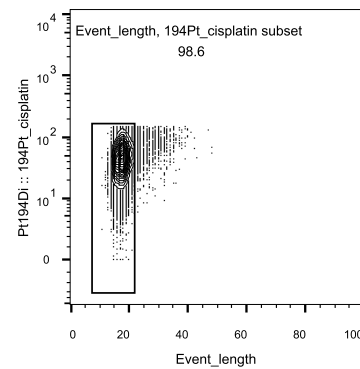

2905\_T051.fcs  
191Ir\_DNA1, 194Pt\_cisplatin subset  
138271

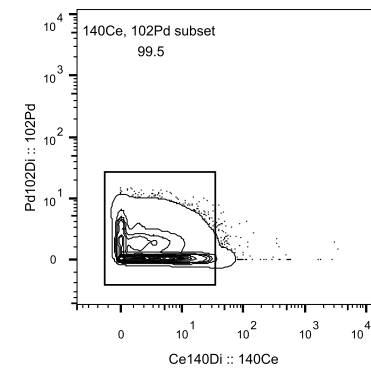

2905\_T051.fcs  
Event\_length, 194Pt\_cisplatin subset  
136288

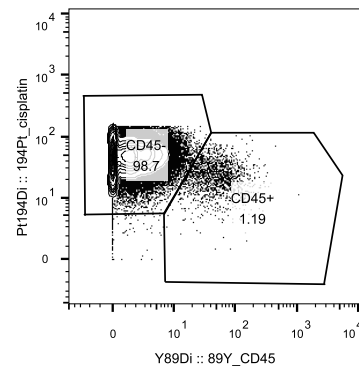

2905\_T051.fcs  
140Ce, 102Pd subset  
135609

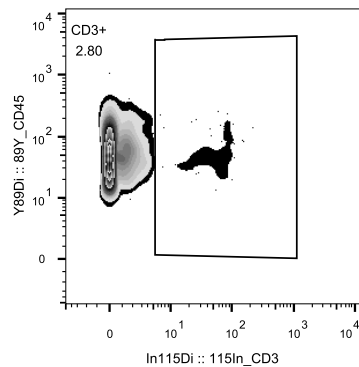

2905\_T051.fcs  
CD45+  
1610

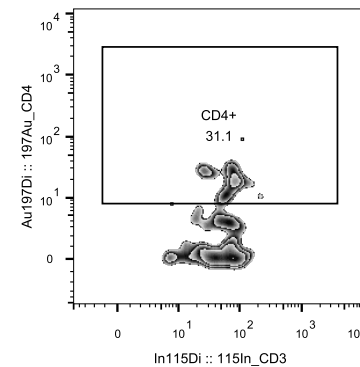

2905\_T051.fcs  
CD3+  
45.0

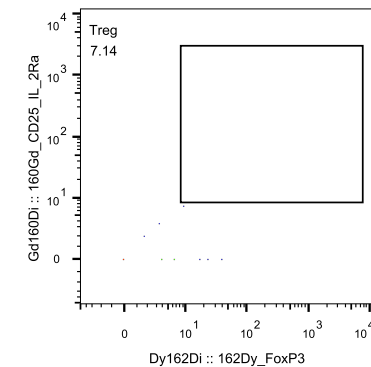

2905\_T051.fcs  
CD4+  
14.0

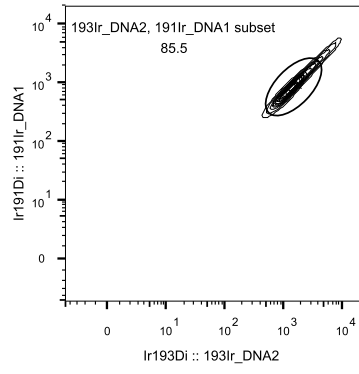

2905\_T052.fcs  
Ungated  
209167

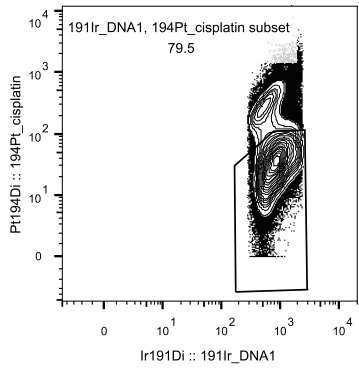

2905\_T052.fcs  
193Ir\_DNA2, 191Ir\_DNA1 subset  
178800

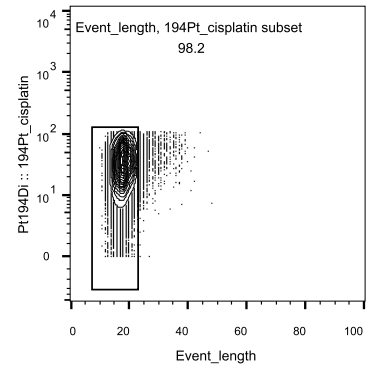

2905\_T052.fcs  
191Ir\_DNA1, 194Pt\_cisplatin subset  
142181

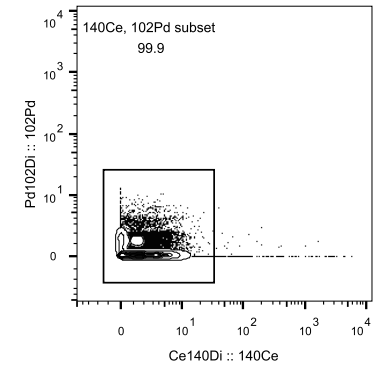

2905\_T052.fcs  
Event\_length, 194Pt\_cisplatin subset  
139639

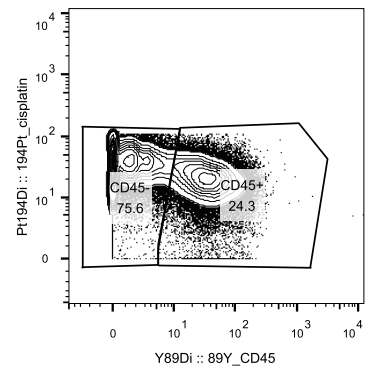

2905\_T052.fcs  
140Ce, 102Pd subset  
139432

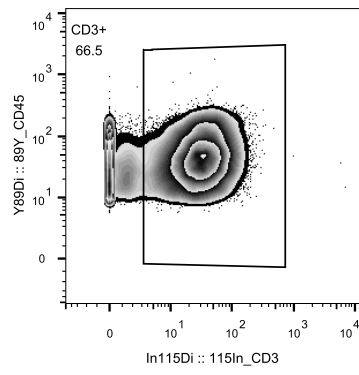

2905\_T052.fcs  
CD45+  
33894

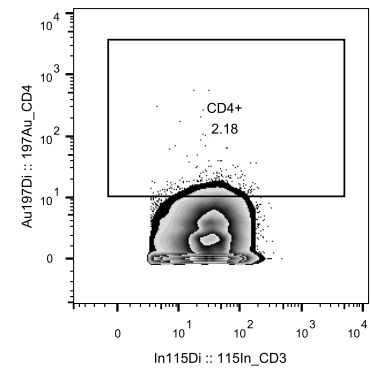

2905\_T052.fcs  
CD3+  
22525

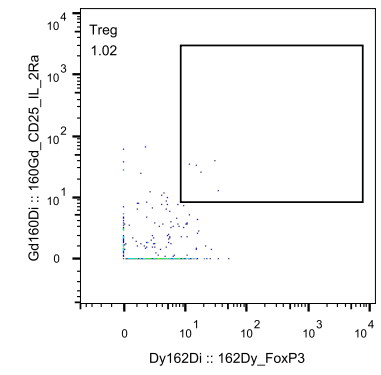

2905\_T052.fcs  
CD4+  
490

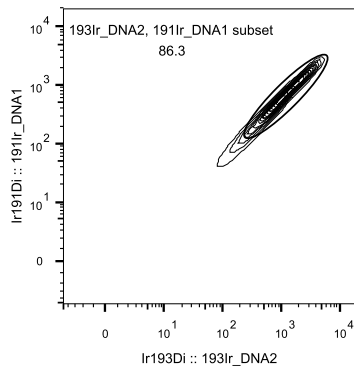

3077\_T055.fcs  
Ungated  
179180

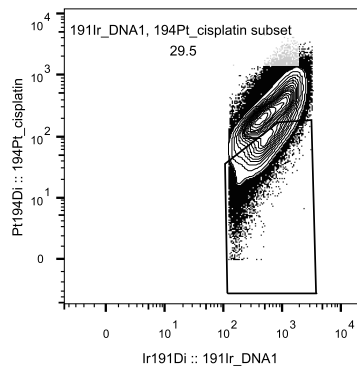

3077\_T055.fcs  
193Ir\_DNA2, 191Ir\_DNA1 subset  
154720

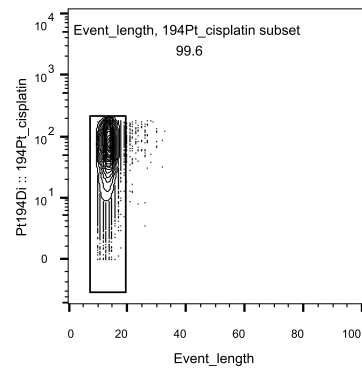

3077\_T055.fcs  
191Ir\_DNA1, 194Pt\_cisplatin subset  
45635

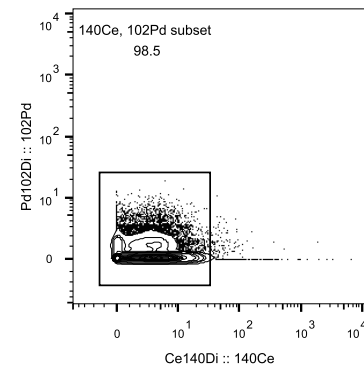

3077\_T055.fcs  
Event\_length, 194Pt\_cisplatin subset  
45453

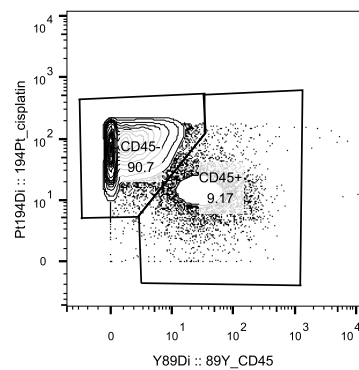

3077\_T055.fcs  
140Ce, 102Pd subset  
44766

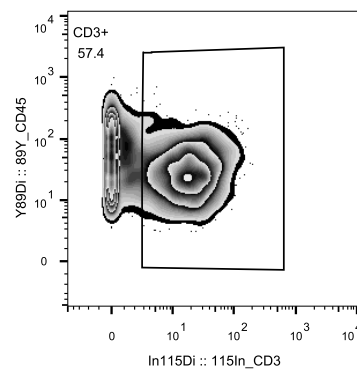

3077\_T055.fcs  
CD45+  
4107

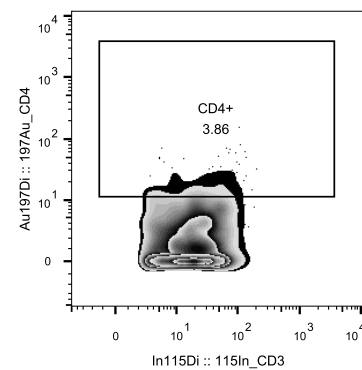

3077\_T055.fcs  
CD3+  
2356

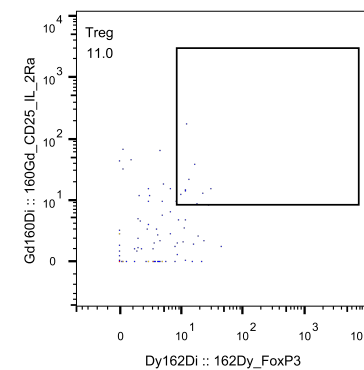

3077\_T055.fcs  
CD4+  
91.0

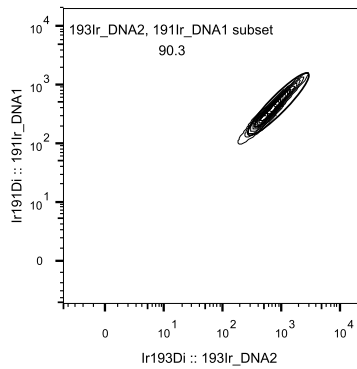

3078\_T056.fcs  
Ungated  
5.05E5

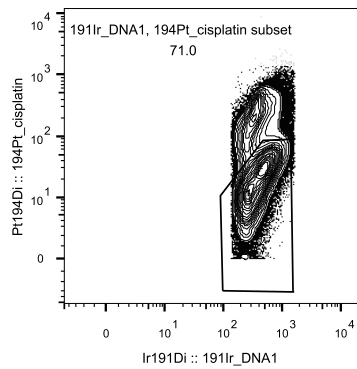

3078\_T056.fcs  
193Ir\_DNA2, 191Ir\_DNA1 subset  
4.56E5

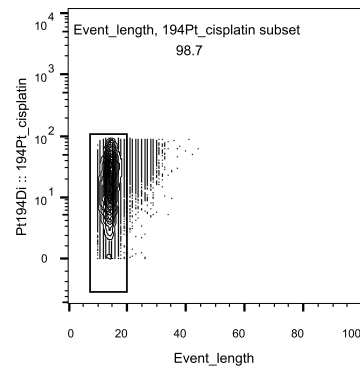

3078\_T056.fcs  
191Ir\_DNA1, 194Pt\_cisplatin subset  
323790

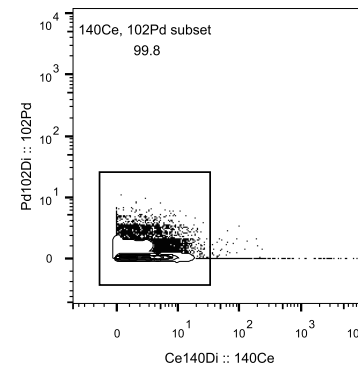

3078\_T056.fcs  
Event\_length, 194Pt\_cisplatin subset  
319433

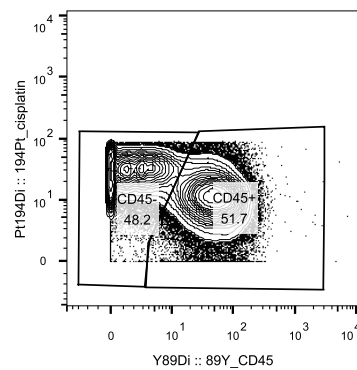

3078\_T056.fcs  
140Ce, 102Pd subset  
318943

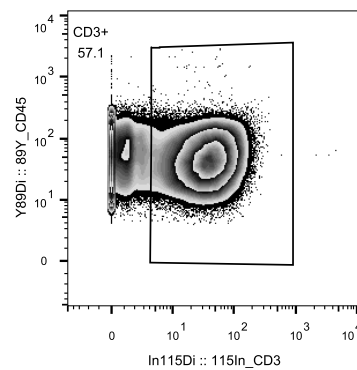

3078\_T056.fcs  
CD45+  
164840

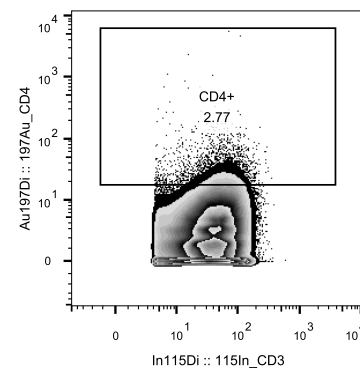

3078\_T056.fcs  
CD3+  
94187

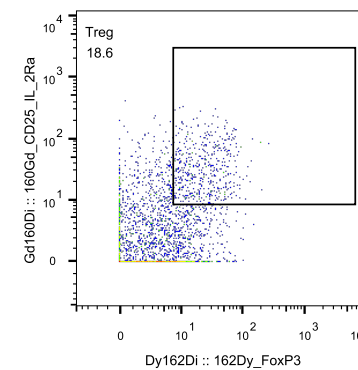

3078\_T056.fcs  
CD4+  
2612

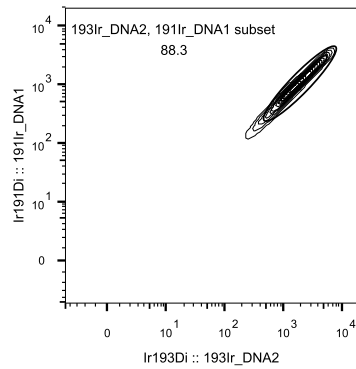

3079\_T057.fcs  
Ungated  
132501

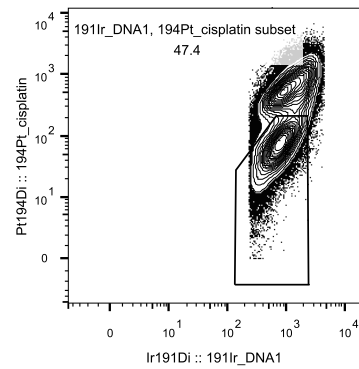

3079\_T057.fcs  
193Ir\_DNA2, 191Ir\_DNA1 subset  
117039

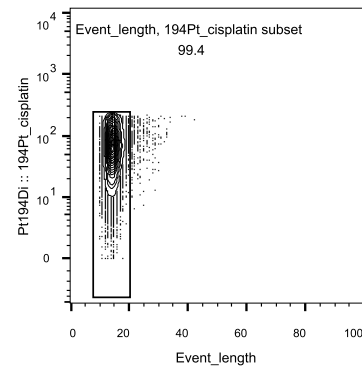

3079\_T057.fcs  
191Ir\_DNA1, 194Pt\_cisplatin subset  
55534

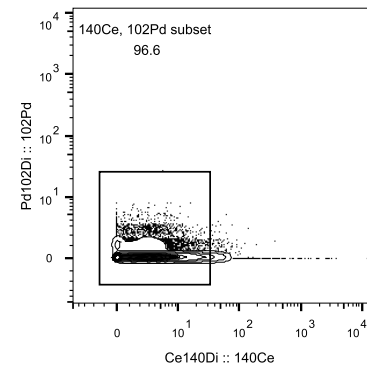

3079\_T057.fcs  
Event\_length, 194Pt\_cisplatin subset  
55188

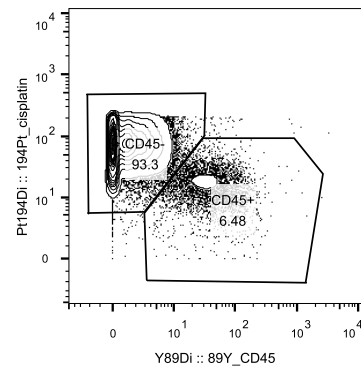

3079\_T057.fcs  
140Ce, 102Pd subset  
53316

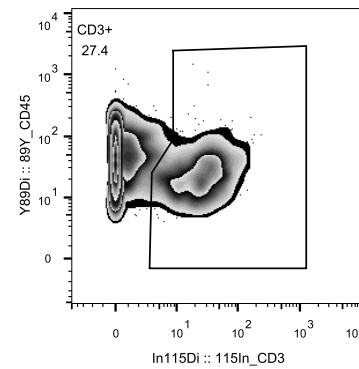

3079\_T057.fcs  
CD45+  
3456

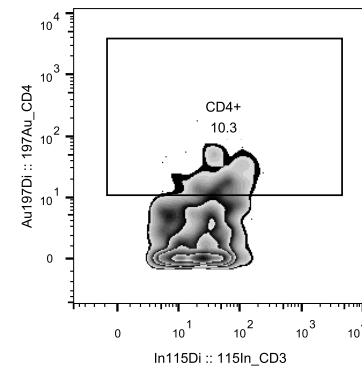

3079\_T057.fcs  
CD3+  
946

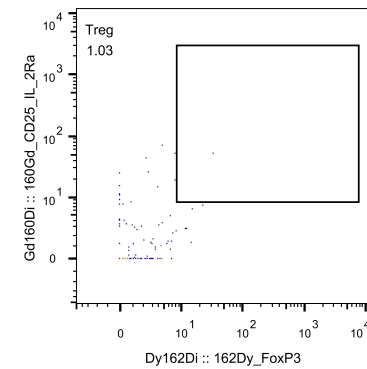

3079\_T057.fcs  
CD4+  
97.0

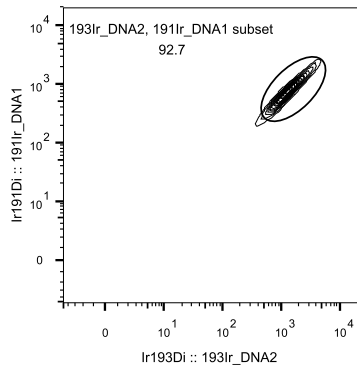

3080\_T058.fcs  
Ungated  
109273

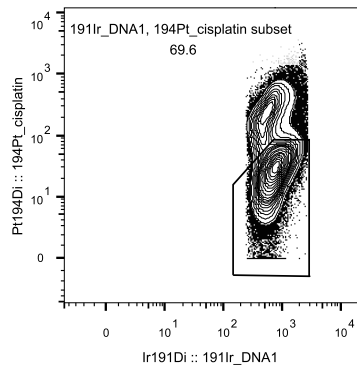

3080\_T058.fcs  
193Ir\_DNA2, 191Ir\_DNA1 subset  
101242

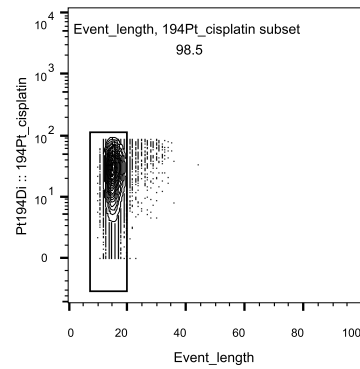

3080\_T058.fcs  
191Ir\_DNA1, 194Pt\_cisplatin subset  
70466

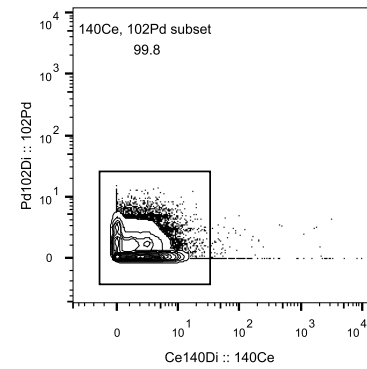

3080\_T058.fcs  
Event\_length, 194Pt\_cisplatin subset  
69436

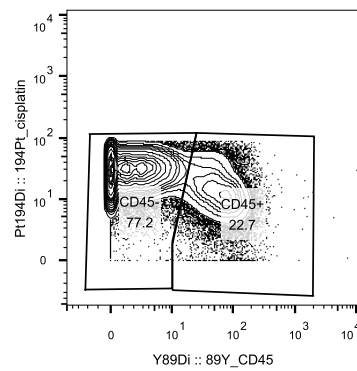

3080\_T058.fcs  
140Ce, 102Pd subset  
69268

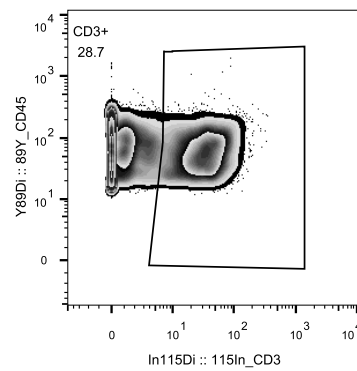

3080\_T058.fcs  
CD45+  
15756

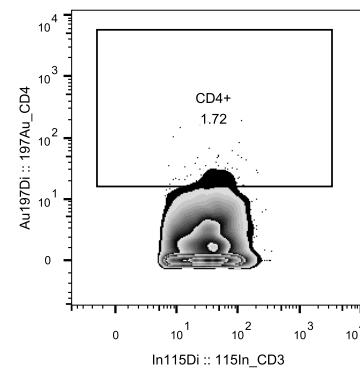

3080\_T058.fcs  
CD3+  
4522

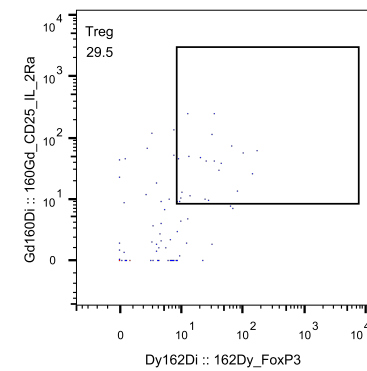

3080\_T058.fcs  
CD4+  
78.0



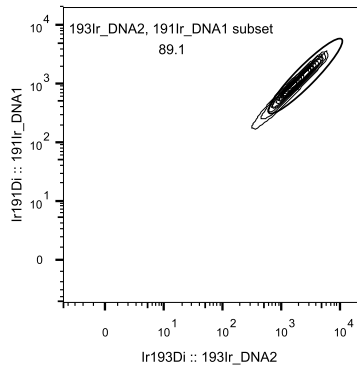

3081\_T059.fcs  
Ungated  
169585

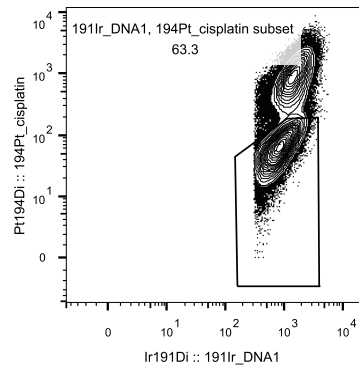

3081\_T059.fcs  
193Ir\_DNA2, 191Ir\_DNA1 subset  
151018

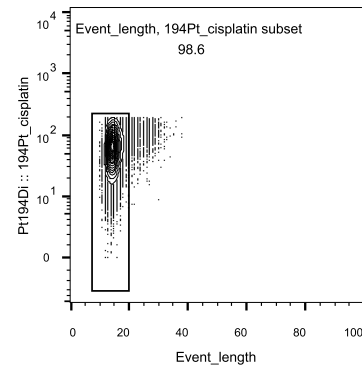

3081\_T059.fcs  
191Ir\_DNA1, 194Pt\_cisplatin subset  
95533

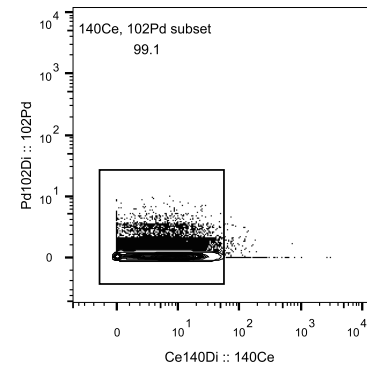

3081\_T059.fcs  
Event\_length, 194Pt\_cisplatin subset  
94192

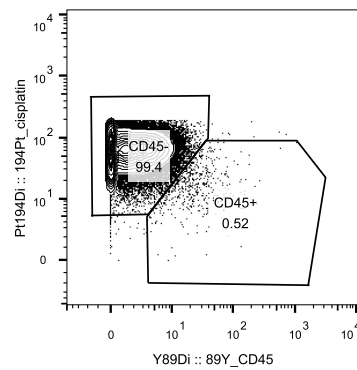

3081\_T059.fcs  
140Ce, 102Pd subset  
93350

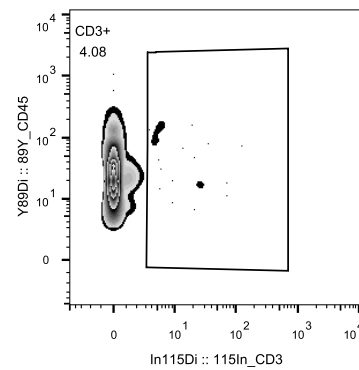

3081\_T059.fcs  
CD45+  
490

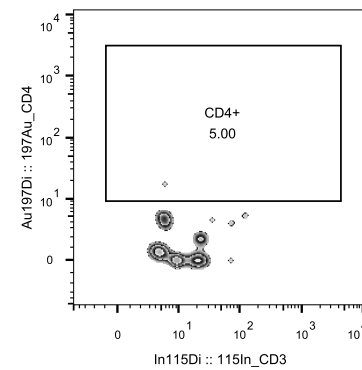

3081\_T059.fcs  
CD3+  
20.0

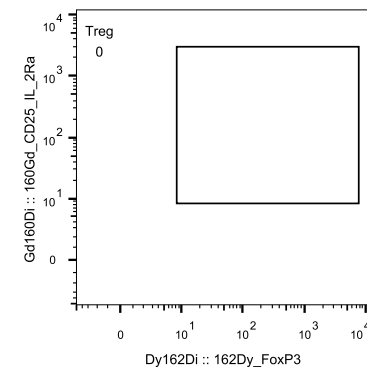

3081\_T059.fcs  
CD4+  
1.00

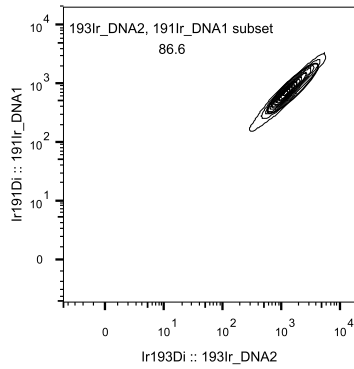

3082\_T060.fcs  
Ungated  
123425

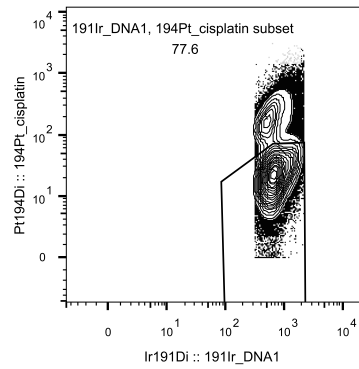

3082\_T060.fcs  
193Ir\_DNA2, 191Ir\_DNA1 subset  
106879

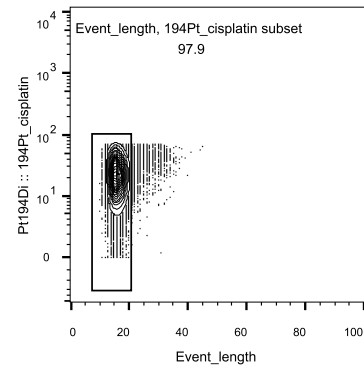

3082\_T060.fcs  
191Ir\_DNA1, 194Pt\_cisplatin subset  
82937

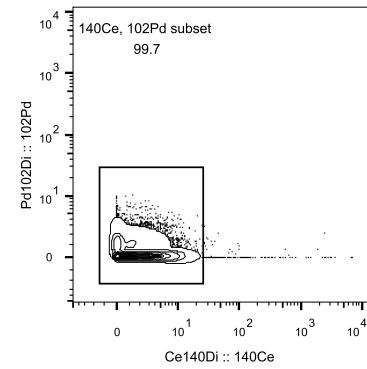

3082\_T060.fcs  
Event\_length, 194Pt\_cisplatin subset  
81233

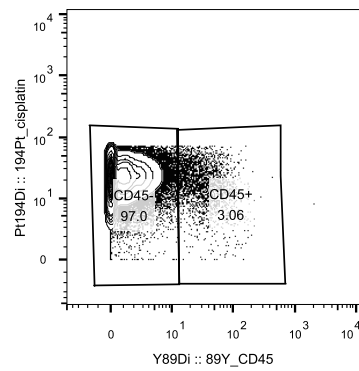

3082\_T060.fcs  
140Ce, 102Pd subset  
80986

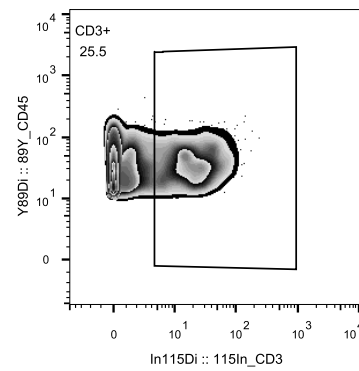

3082\_T060.fcs  
CD45+  
2475

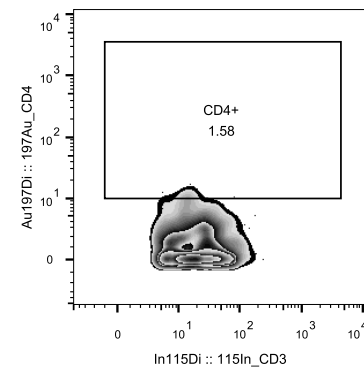

3082\_T060.fcs  
CD3+  
632

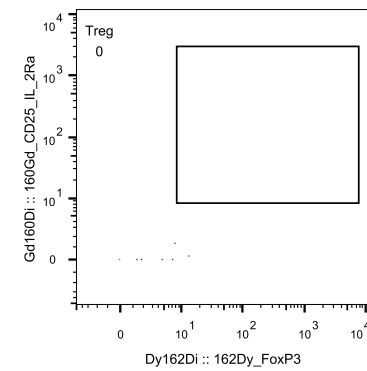

3082\_T060.fcs  
CD4+  
10.0

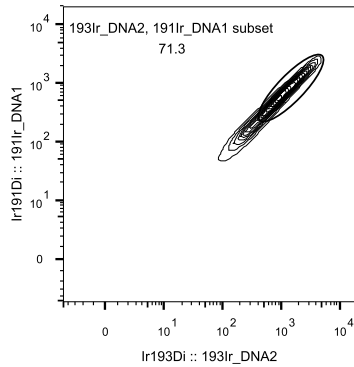

3096\_T061.fcs  
Ungated  
146846

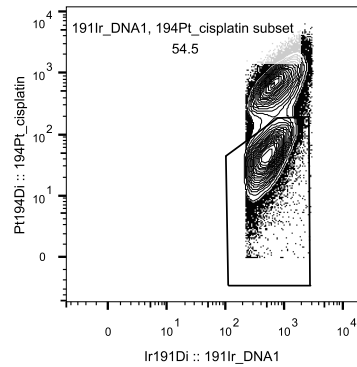

3096\_T061.fcs  
193Ir\_DNA2, 191Ir\_DNA1 subset  
104671

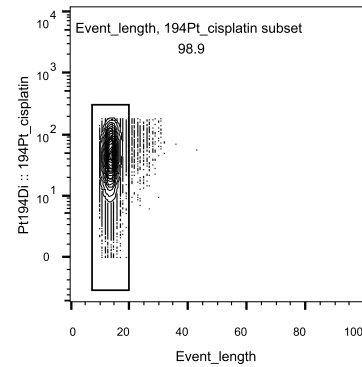

3096\_T061.fcs  
191Ir\_DNA1, 194Pt\_cisplatin subset  
57089

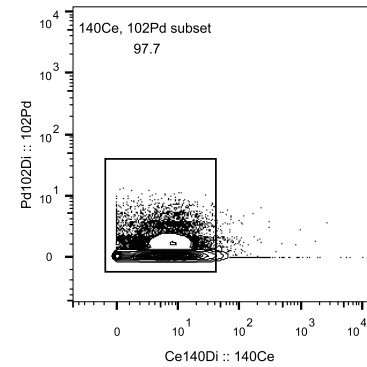

3096\_T061.fcs  
Event\_length, 194Pt\_cisplatin subset  
56443

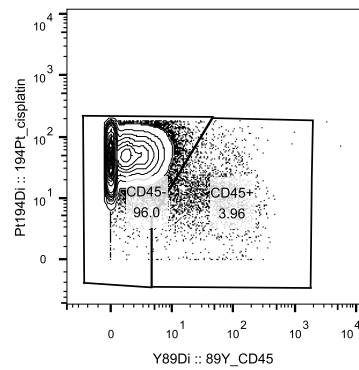

3096\_T061.fcs  
140Ce, 102Pd subset  
55125

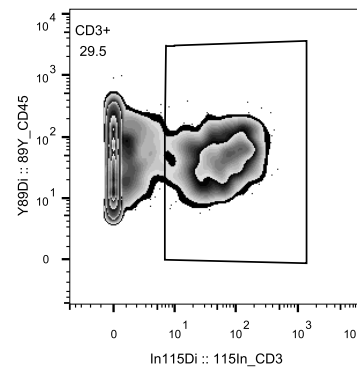

3096\_T061.fcs  
CD45+  
2185

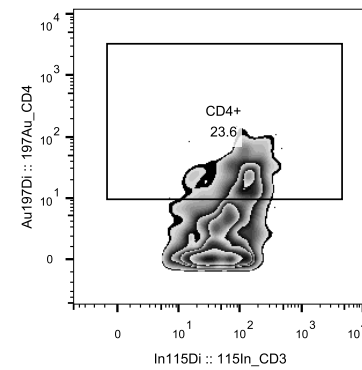

3096\_T061.fcs  
CD3+  
645

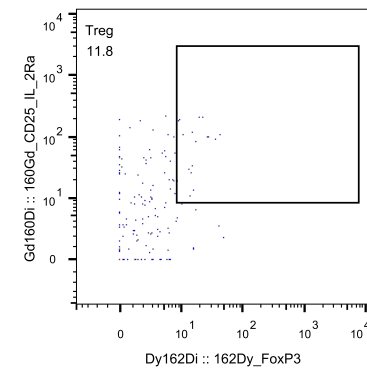

3096\_T061.fcs  
CD4+  
152

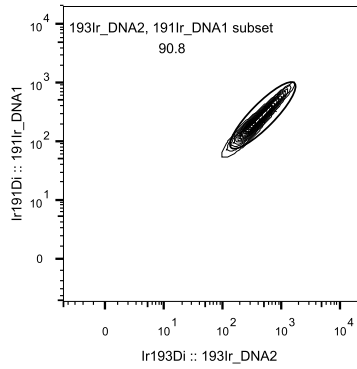

3097\_T062.fcs  
Ungated  
5.44E5

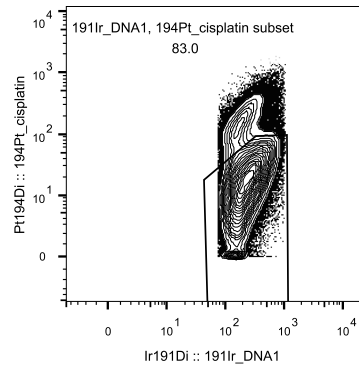

3097\_T062.fcs  
193Ir\_DNA2, 191Ir\_DNA1 subset  
4.94E5

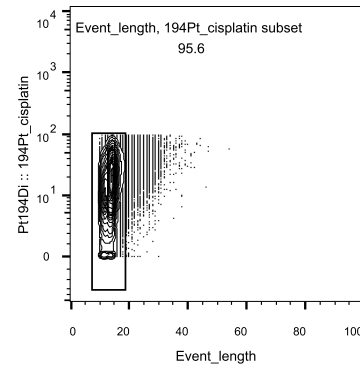

3097\_T062.fcs  
191Ir\_DNA1, 194Pt\_cisplatin subset  
4.10E5

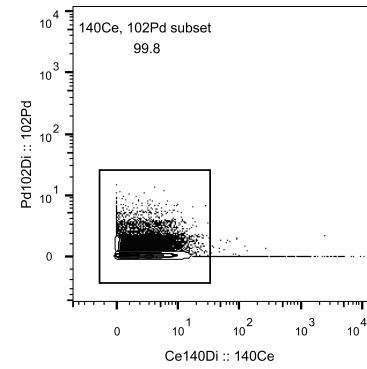

3097\_T062.fcs  
Event\_length, 194Pt\_cisplatin subset  
392169

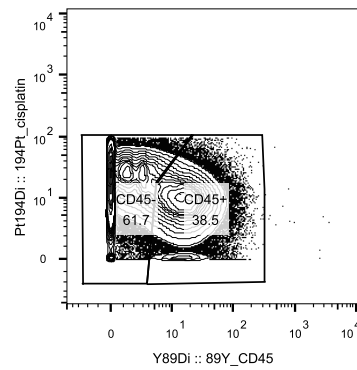

3097\_T062.fcs  
140Ce, 102Pd subset  
391578

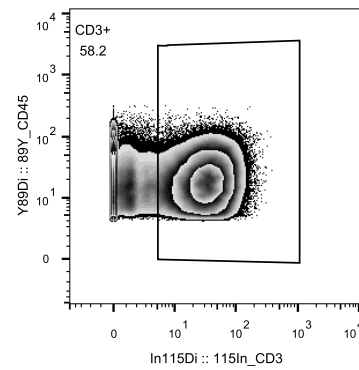

3097\_T062.fcs  
CD45+  
150878

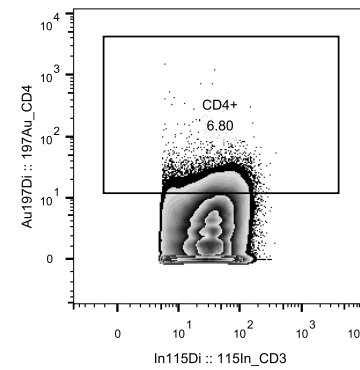

3097\_T062.fcs  
CD3+  
87787

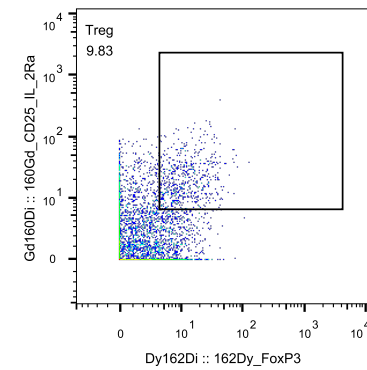

3097\_T062.fcs  
CD4+  
5971

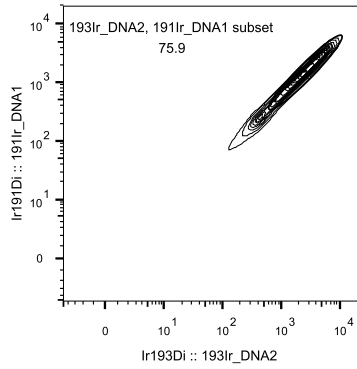

3098\_T063.fcs  
Ungated  
64292

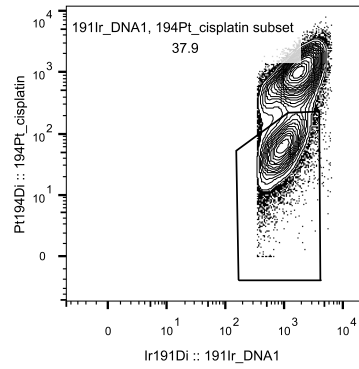

3098\_T063.fcs  
193Ir\_DNA2, 191Ir\_DNA1 subset  
48812

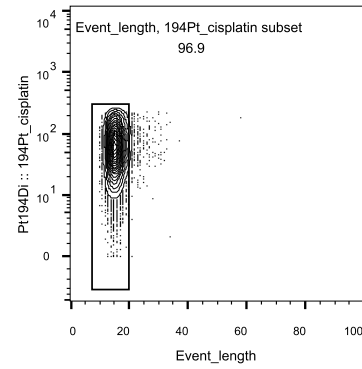

3098\_T063.fcs  
191Ir\_DNA1, 194Pt\_cisplatin subset  
18524

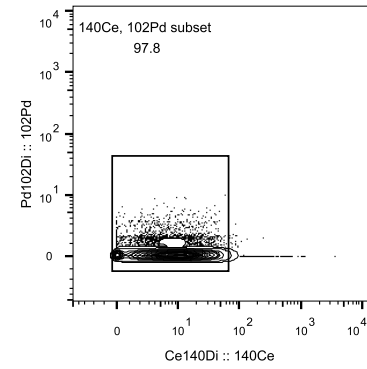

3098\_T063.fcs  
Event\_length, 194Pt\_cisplatin subset  
17957

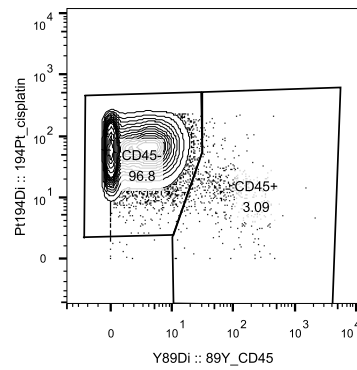

3098\_T063.fcs  
140Ce, 102Pd subset  
17560

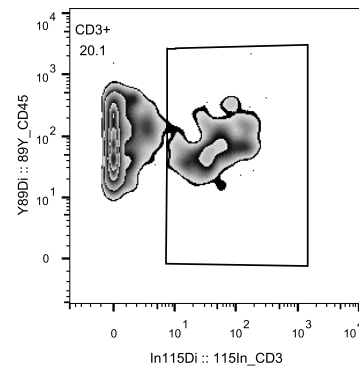

3098\_T063.fcs  
CD45+  
542

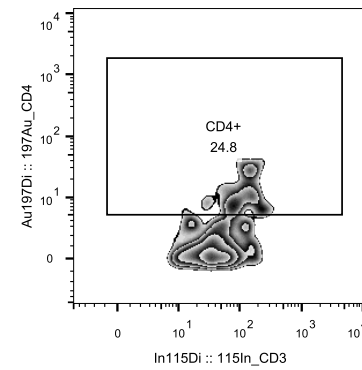

3098\_T063.fcs  
CD3+  
109

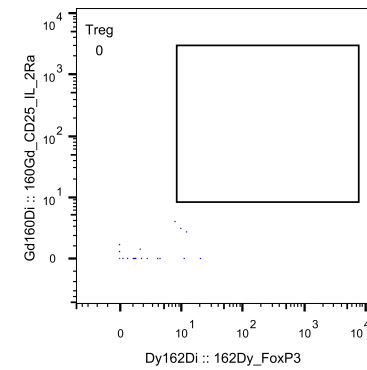

3098\_T063.fcs  
CD4+  
27.0

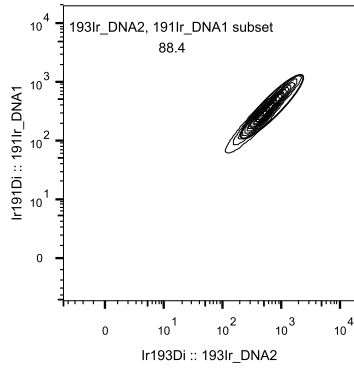

3098\_T064.fcs  
Ungated  
184454

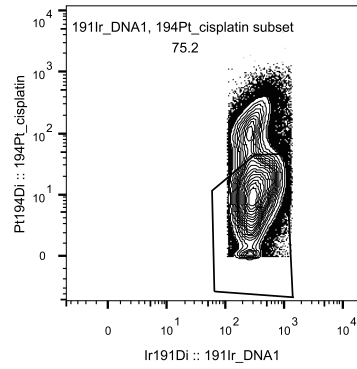

3098\_T064.fcs  
193Ir\_DNA2, 191Ir\_DNA1 subset  
163087

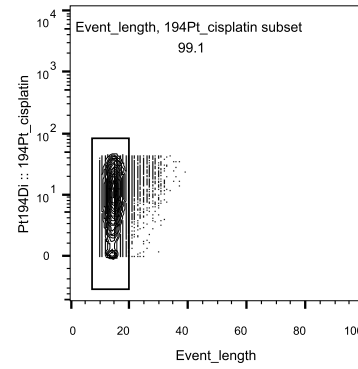

3098\_T064.fcs  
191Ir\_DNA1, 194Pt\_cisplatin subset  
122606

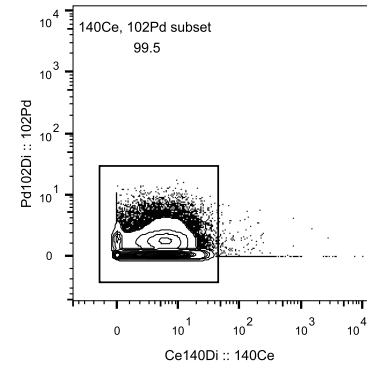

3098\_T064.fcs  
Event\_length, 194Pt\_cisplatin subset  
121515

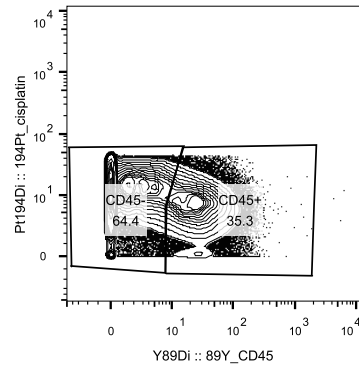

3098\_T064.fcs  
140Ce, 102Pd subset  
120963

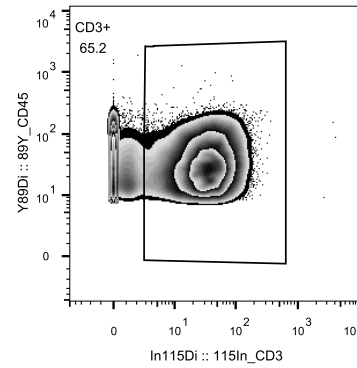

3098\_T064.fcs  
CD45+  
42665

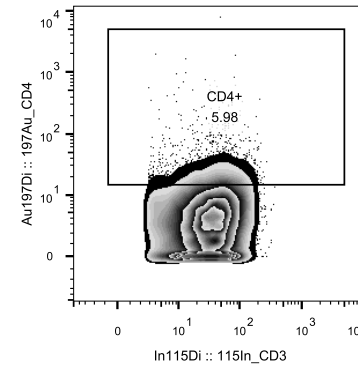

3098\_T064.fcs  
CD3+  
27803

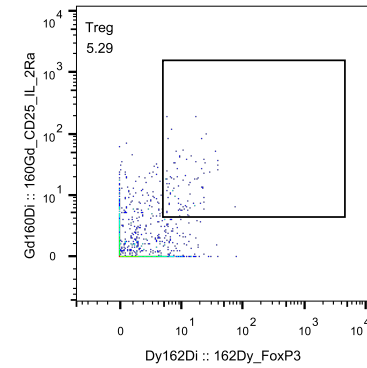

3098\_T064.fcs  
CD4+  
1664

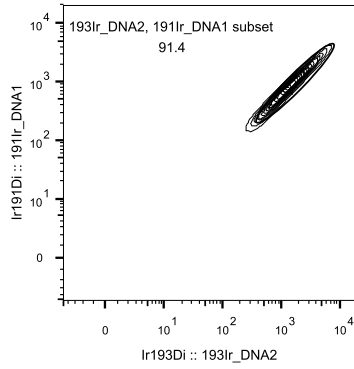

3098\_T065.fcs  
Ungated  
67254

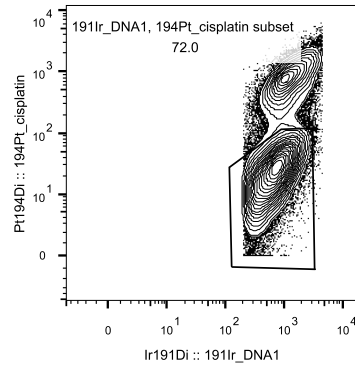

3098\_T065.fcs  
193Ir\_DNA2, 191Ir\_DNA1 subset  
61469

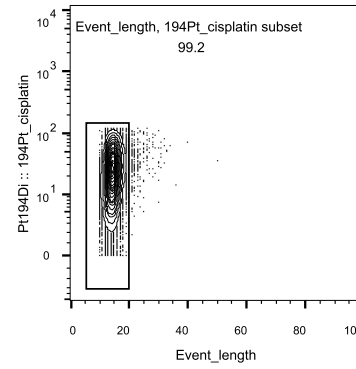

3098\_T065.fcs  
191Ir\_DNA1, 194Pt\_cisplatin subset  
44267

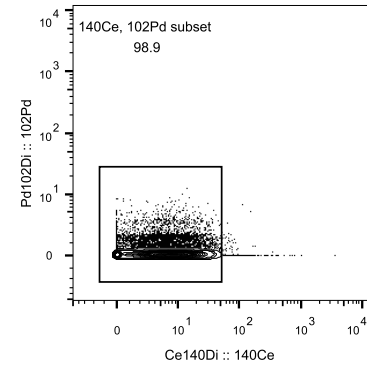

3098\_T065.fcs  
Event\_length, 194Pt\_cisplatin subset  
43896

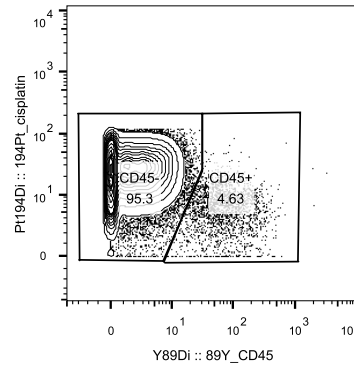

3098\_T065.fcs  
140Ce, 102Pd subset  
43396

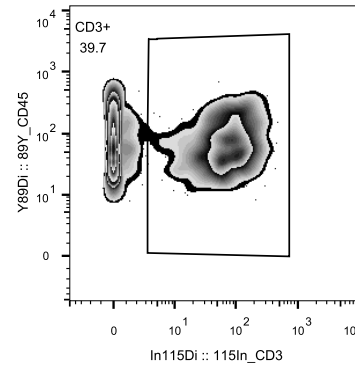

3098\_T065.fcs  
CD45+  
2008

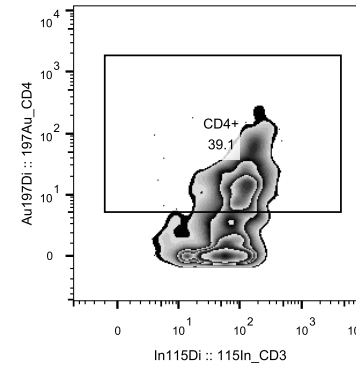

3098\_T065.fcs  
CD3+  
798

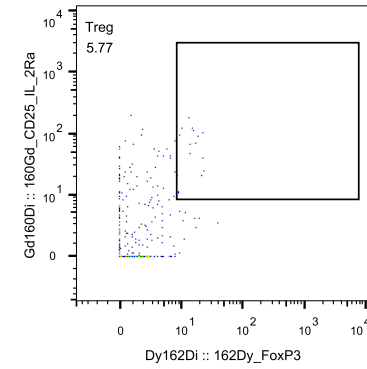

3098\_T065.fcs  
CD4+  
312

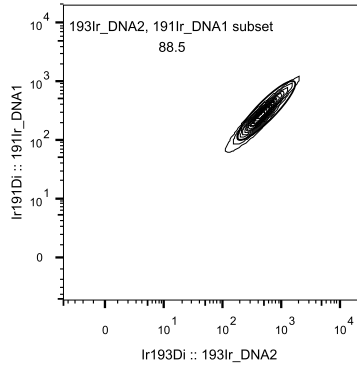

3098\_T066.fcs  
Ungated  
287533

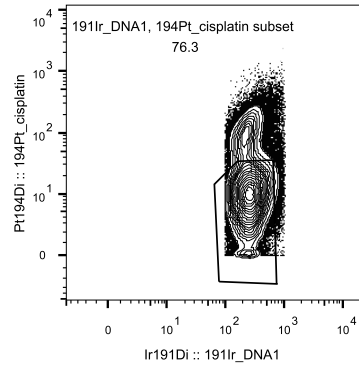

3098\_T066.fcs  
193Ir\_DNA2, 191Ir\_DNA1 subset  
254403

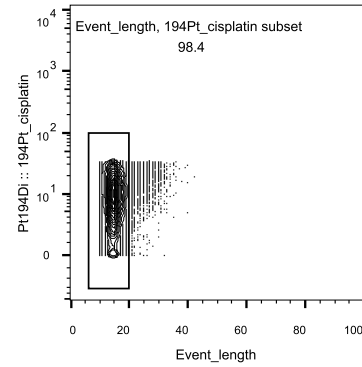

3098\_T066.fcs  
191Ir\_DNA1, 194Pt\_cisplatin subset  
194020

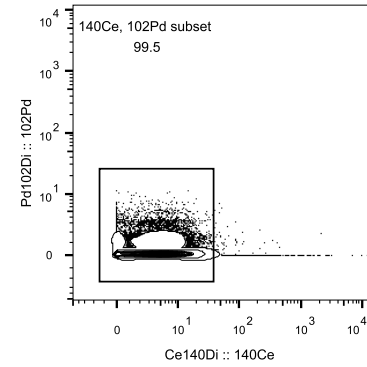

3098\_T066.fcs  
Event\_length, 194Pt\_cisplatin subset  
190824

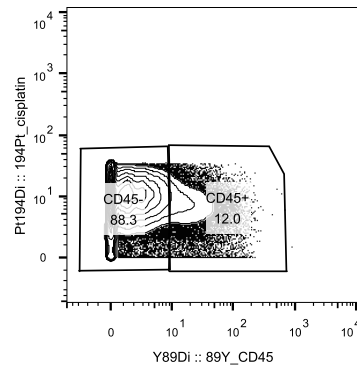

3098\_T066.fcs  
140Ce, 102Pd subset  
189896

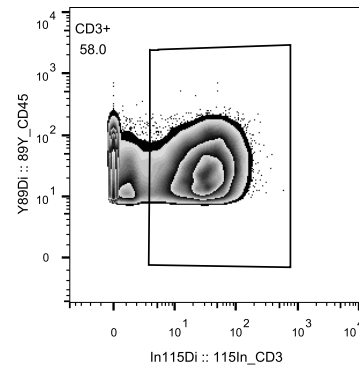

3098\_T066.fcs  
CD45+  
22713

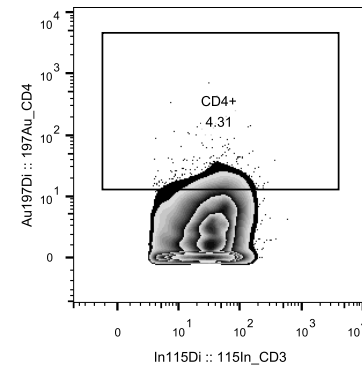

3098\_T066.fcs  
CD3+  
13163

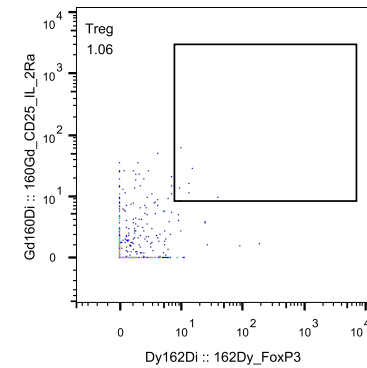

3098\_T066.fcs  
CD4+  
567



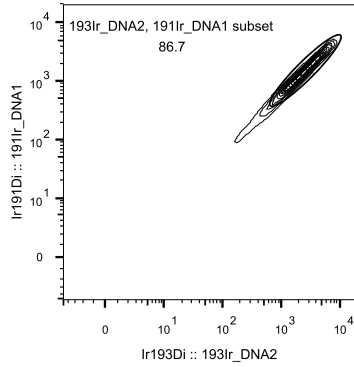

3192\_T069.fcs  
Ungated  
126304

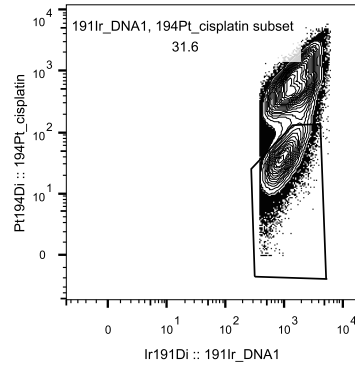

3192\_T069.fcs  
193Ir\_DNA2, 191r\_DNA1 subset  
109479

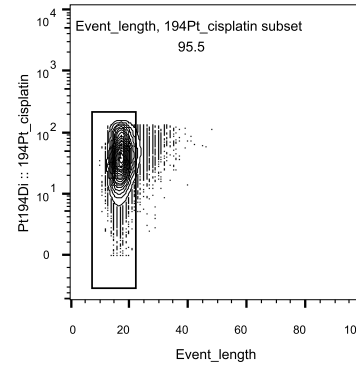

3192\_T069.fcs  
191r\_DNA1, 194Pt\_cisplatin subset  
34636

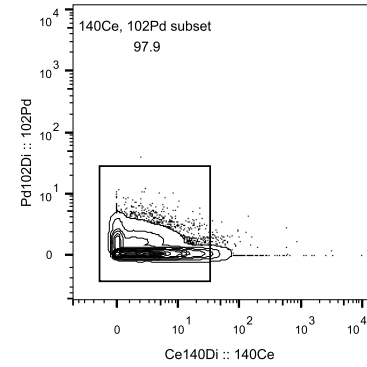

3192\_T069.fcs  
Event\_length, 194Pt\_cisplatin subset  
33089

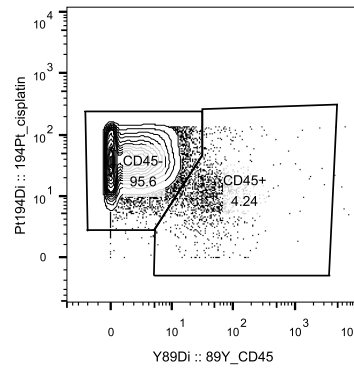

3192\_T069.fcs  
140Ce, 102Pd subset  
32390

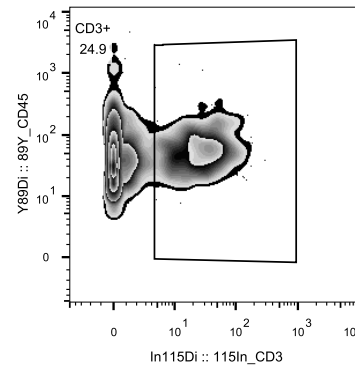

3192\_T069.fcs  
CD45+  
1373

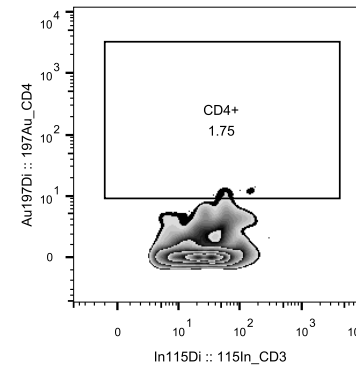

3192\_T069.fcs  
CD3+  
342

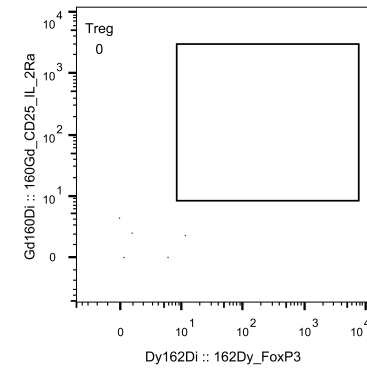

3192\_T069.fcs  
CD4+  
6.00

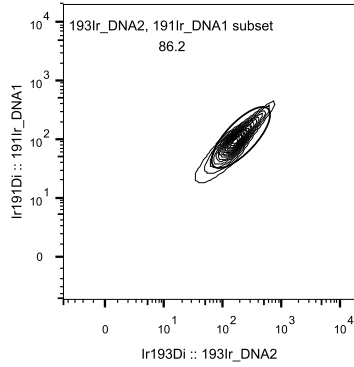

3192\_T070.fcs  
Ungated  
5.88E5

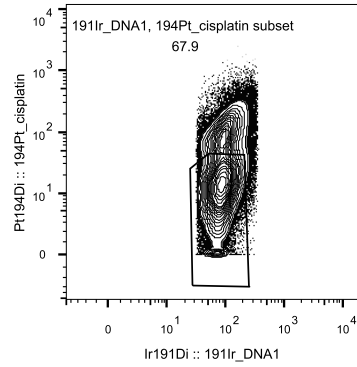

3192\_T070.fcs  
193Ir\_DNA2, 191Ir\_DNA1 subset  
5.07E5

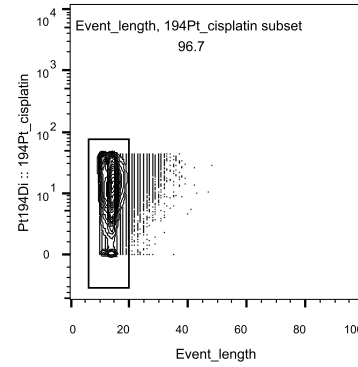

3192\_T070.fcs  
191Ir\_DNA1, 194Pt\_cisplatin subset  
344385

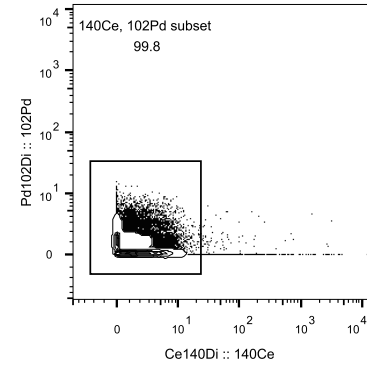

3192\_T070.fcs  
Event\_length, 194Pt\_cisplatin subset  
332861

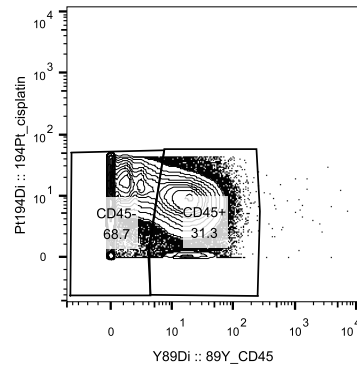

3192\_T070.fcs  
140Ce, 102Pd subset  
332260

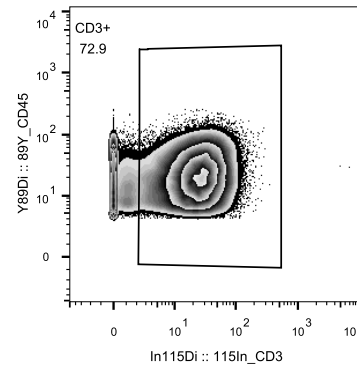

3192\_T070.fcs  
CD45+  
104045

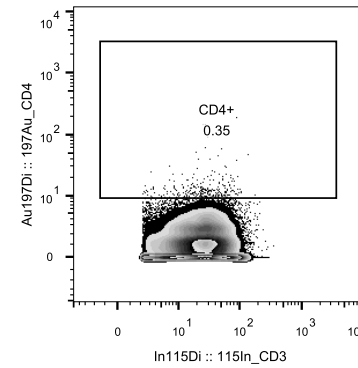

3192\_T070.fcs  
CD3+  
75819

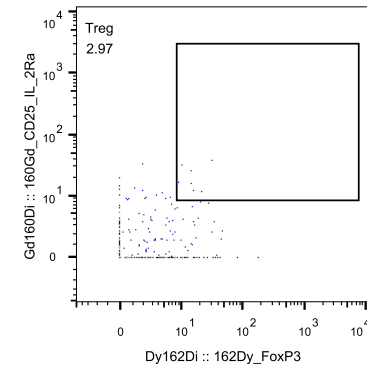

3192\_T070.fcs  
CD4+  
269

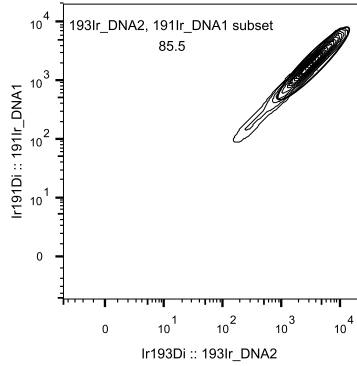

3192\_T071.fcs  
Ungated  
36879

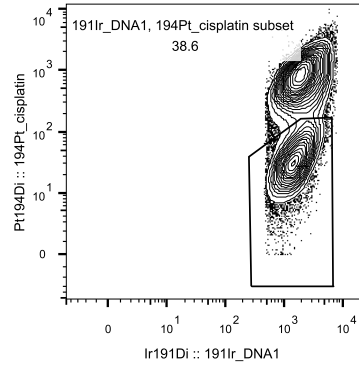

3192\_T071.fcs  
193Ir\_DNA2, 191Ir\_DNA1 subset  
31517

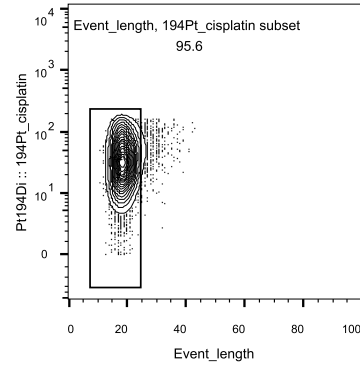

3192\_T071.fcs  
191Ir\_DNA1, 194Pt\_cisplatin subset  
12165

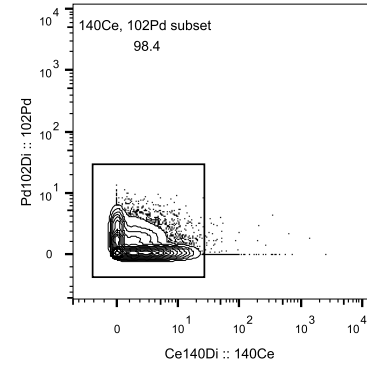

3192\_T071.fcs  
Event\_length, 194Pt\_cisplatin subset  
11624

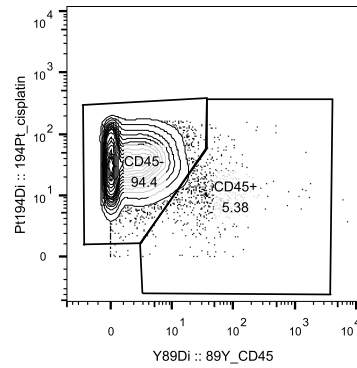

3192\_T071.fcs  
140Ce, 102Pd subset  
11435

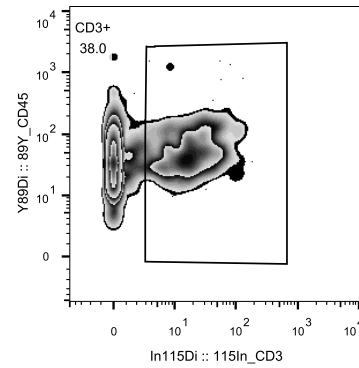

3192\_T071.fcs  
CD45+  
615

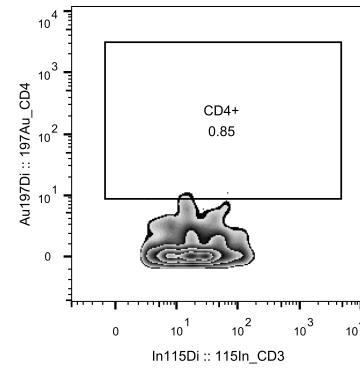

3192\_T071.fcs  
CD3+  
234

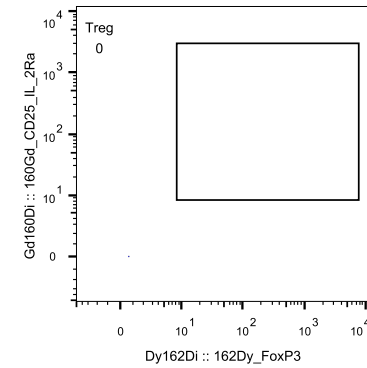

3192\_T071.fcs  
CD4+  
2.00

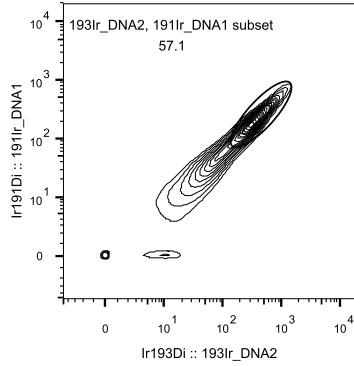

3192\_T072.fcs  
Ungated  
278703

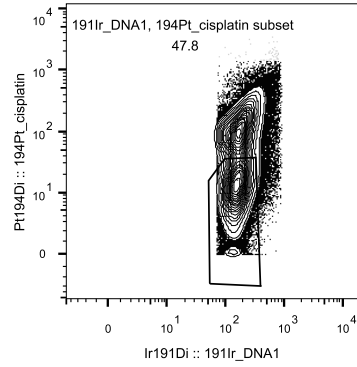

3192\_T072.fcs  
193Ir\_DNA2, 191Ir\_DNA1 subset  
159065

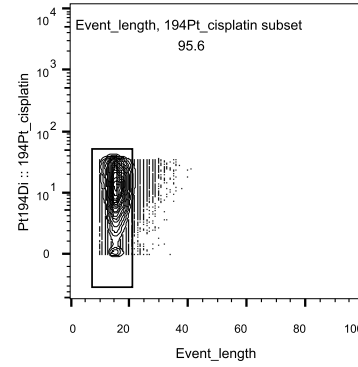

3192\_T072.fcs  
191Ir\_DNA1, 194Pt\_cisplatin subset  
76093

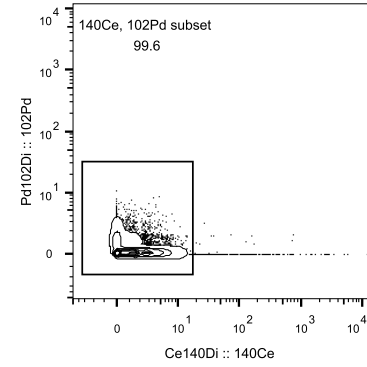

3192\_T072.fcs  
Event\_length, 194Pt\_cisplatin subset  
72726

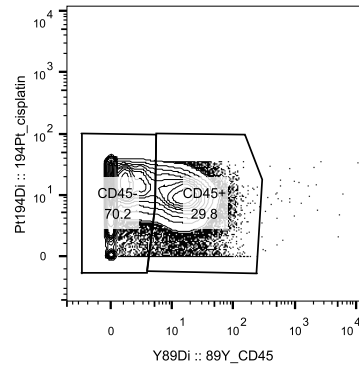

3192\_T072.fcs  
140Ce, 102Pd subset  
72402

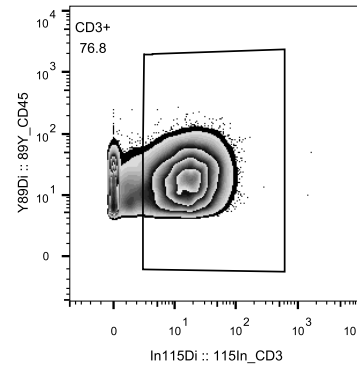

3192\_T072.fcs  
CD45+  
21546

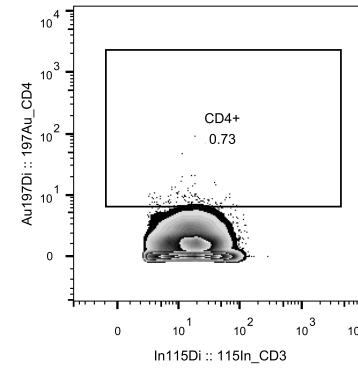

3192\_T072.fcs  
CD3+  
16547

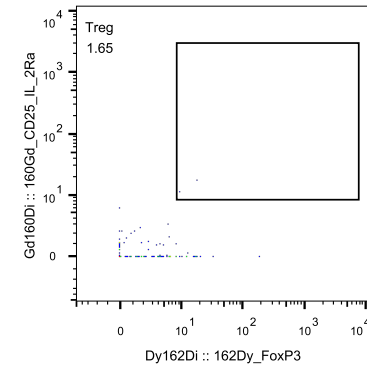

3192\_T072.fcs  
CD4+  
121

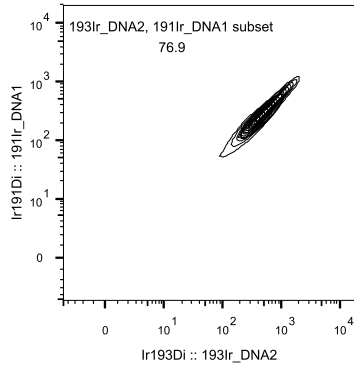

3193\_T067.fcs  
Ungated  
9.07E5

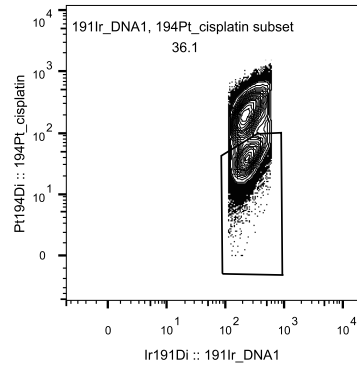

3193\_T067.fcs  
193Ir\_DNA2, 191Ir\_DNA1 subset  
6.98E5

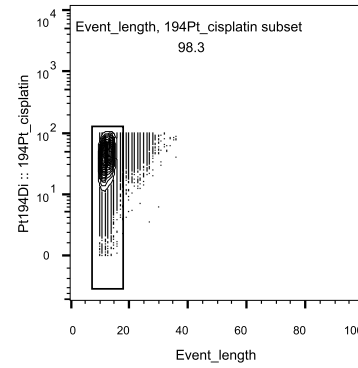

3193\_T067.fcs  
191Ir\_DNA1, 194Pt\_cisplatin subset  
251916

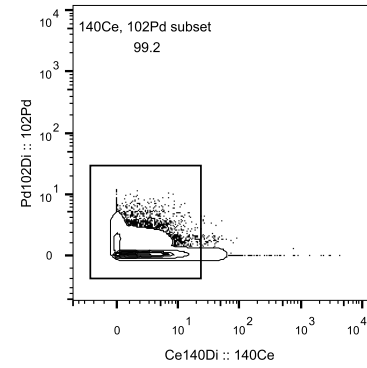

3193\_T067.fcs  
Event\_length, 194Pt\_cisplatin subset  
247573

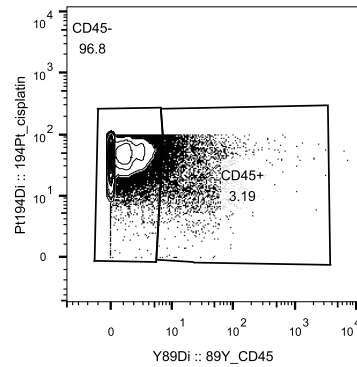

3193\_T067.fcs  
140Ce, 102Pd subset  
245535

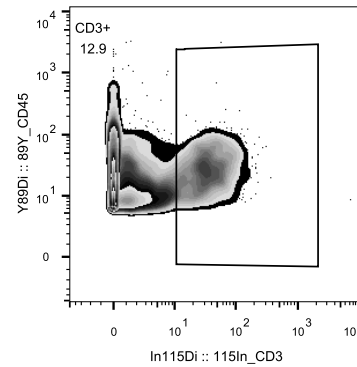

3193\_T067.fcs  
CD45+  
7841

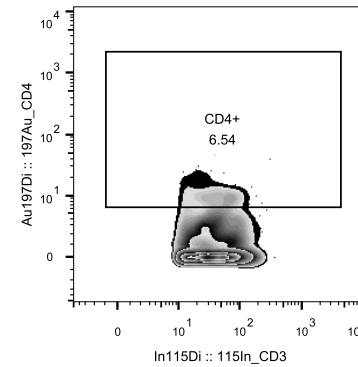

3193\_T067.fcs  
CD3+  
1009

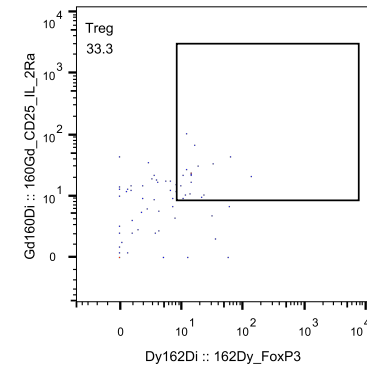

3193\_T067.fcs  
CD4+  
66.0

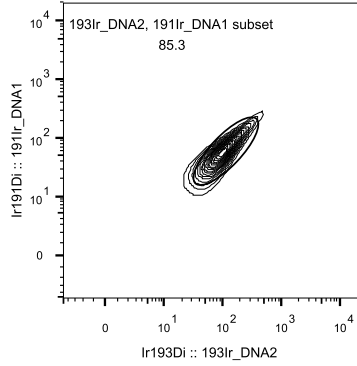

3194\_T068.fcs  
Ungated  
7.35E5

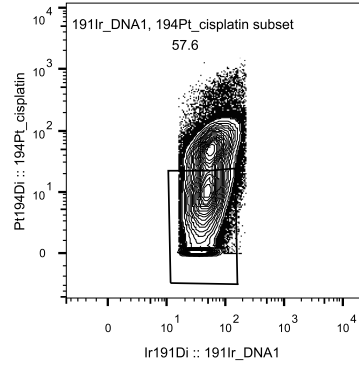

3194\_T068.fcs  
193Ir\_DNA2, 191Ir\_DNA1 subset  
6.27E5

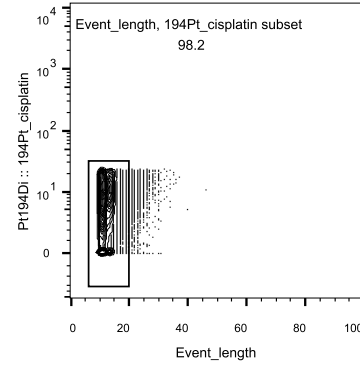

3194\_T068.fcs  
191Ir\_DNA1, 194Pt\_cisplatin subset  
360957

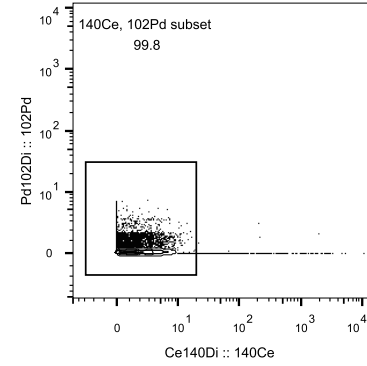

3194\_T068.fcs  
Event\_length, 194Pt\_cisplatin subset  
354598

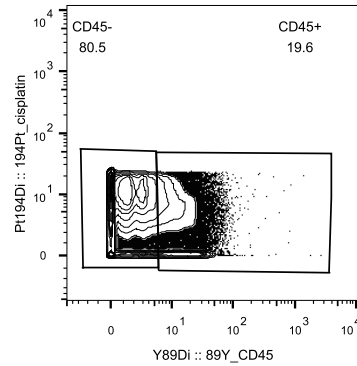

3194\_T068.fcs  
140Ce, 102Pd subset  
353985

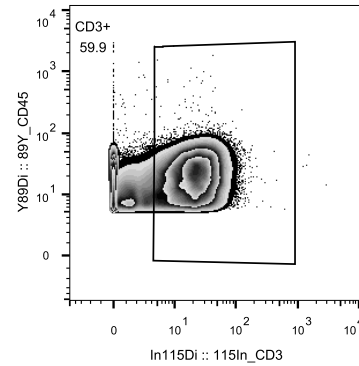

3194\_T068.fcs  
CD45+  
69427

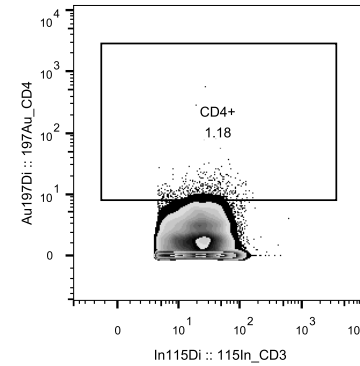

3194\_T068.fcs  
CD3+  
41599

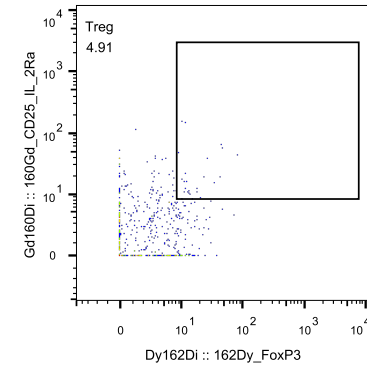

3194\_T068.fcs  
CD4+  
489

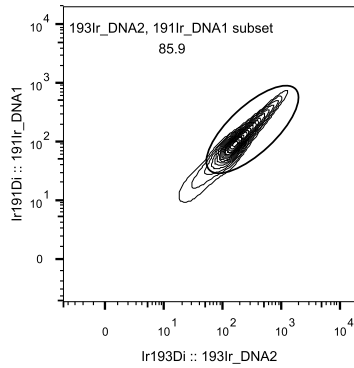

3293\_T073.fcs  
Ungated  
5.25E5

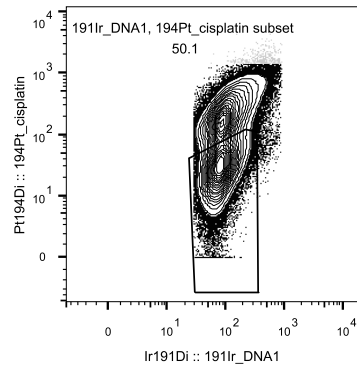

3293\_T073.fcs  
193Ir\_DNA2, 191Ir\_DNA1 subset  
4.51E5

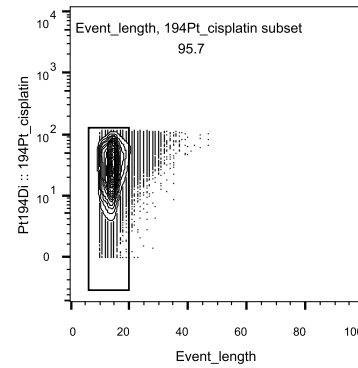

3293\_T073.fcs  
191Ir\_DNA1, 194Pt\_cisplatin subset  
225881

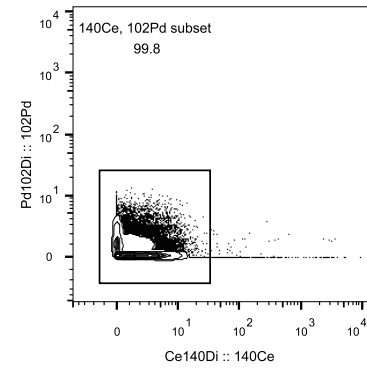

3293\_T073.fcs  
Event\_length, 194Pt\_cisplatin subset  
216274

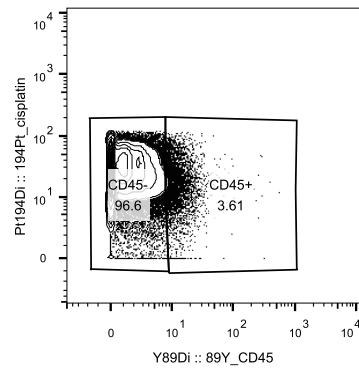

3293\_T073.fcs  
140Ce, 102Pd subset  
215888

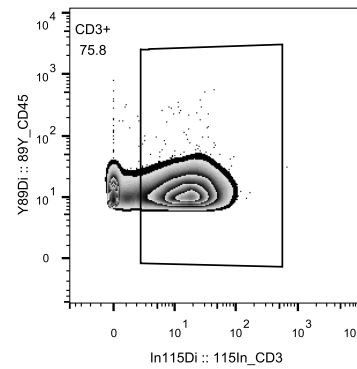

3293\_T073.fcs  
CD45+  
7785

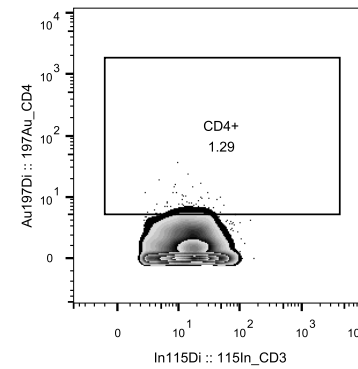

3293\_T073.fcs  
CD3+  
5902

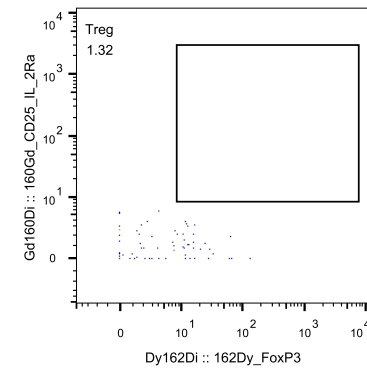

3293\_T073.fcs  
CD4+  
76.0

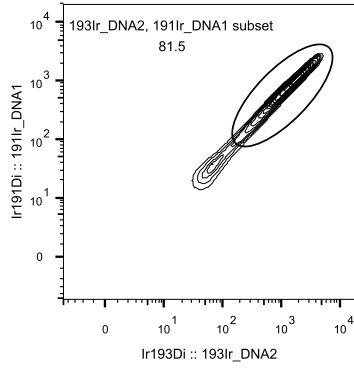

3294\_T074.fcs  
Ungated  
246441

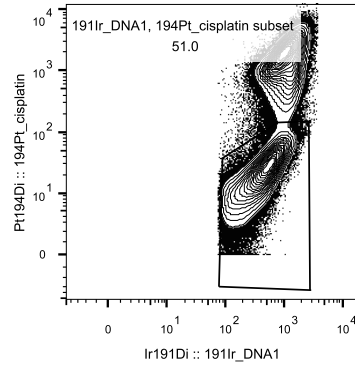

3294\_T074.fcs  
193Ir\_DNA2, 191Ir\_DNA1 subset  
200821

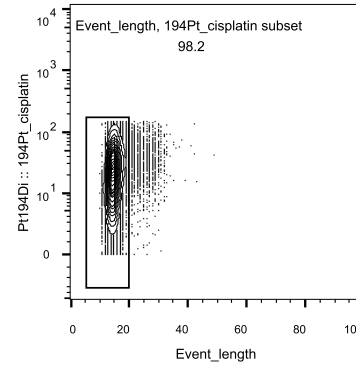

3294\_T074.fcs  
191Ir\_DNA1, 194Pt\_cisplatin subset  
102390

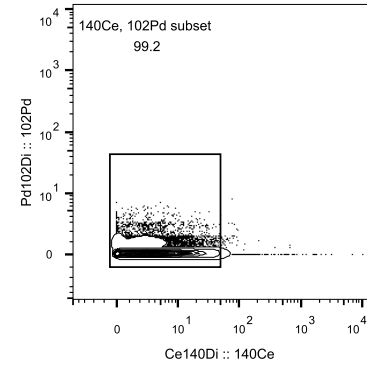

3294\_T074.fcs  
Event\_length, 194Pt\_cisplatin subset  
100536

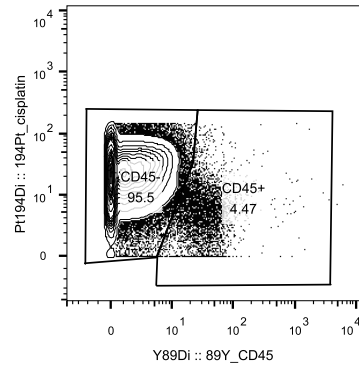

3294\_T074.fcs  
140Ce, 102Pd subset  
99737

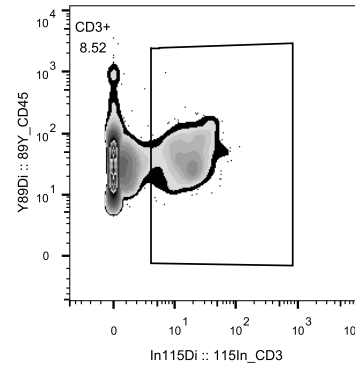

3294\_T074.fcs  
CD45+  
4462

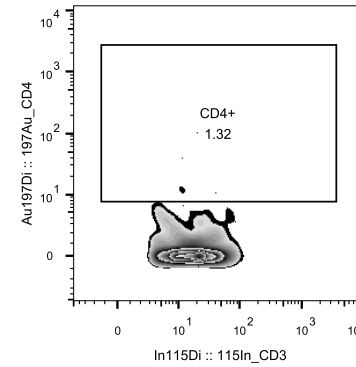

3294\_T074.fcs  
CD3+  
380

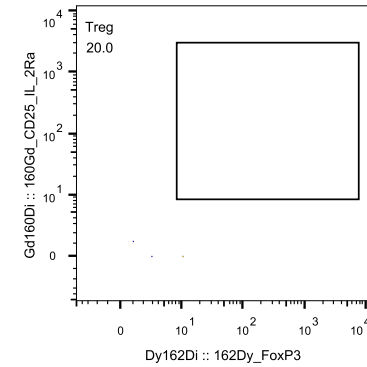

3294\_T074.fcs  
CD4+  
5.00



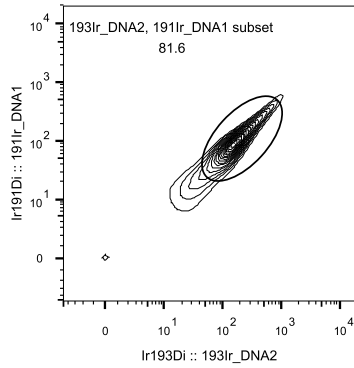

3353\_T076.fcs  
Ungated  
9.47E5

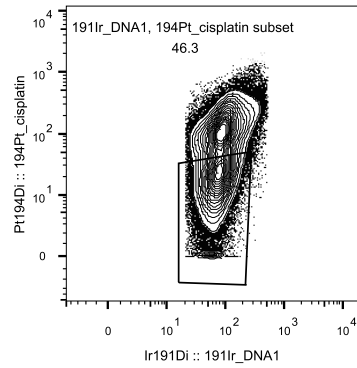

3353\_T076.fcs  
193Ir\_DNA2, 191Ir\_DNA1 subset  
7.73E5

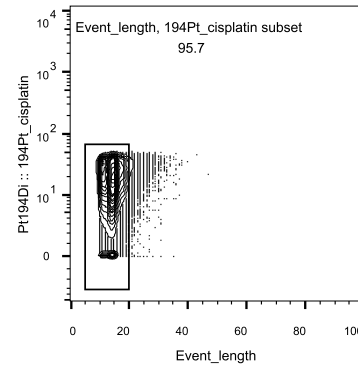

3353\_T076.fcs  
191Ir\_DNA1, 194Pt\_cisplatin subset  
358297

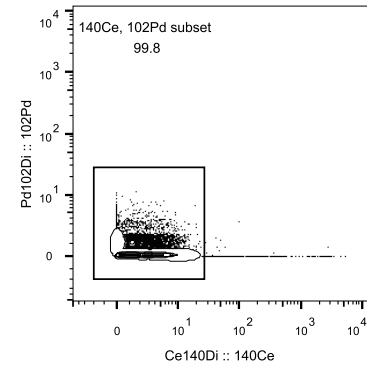

3353\_T076.fcs  
Event\_length, 194Pt\_cisplatin subset  
342764

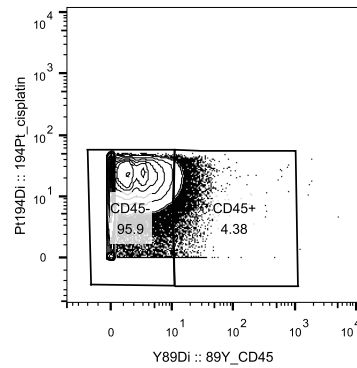

3353\_T076.fcs  
140Ce, 102Pd subset  
342233

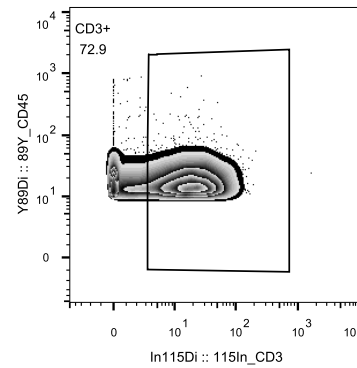

3353\_T076.fcs  
CD45+  
15000

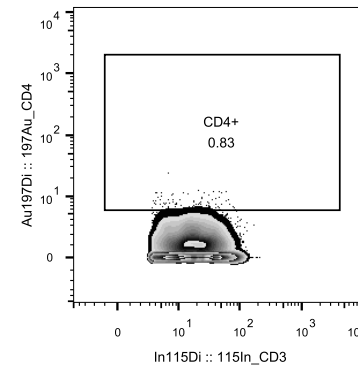

3353\_T076.fcs  
CD3+  
10940

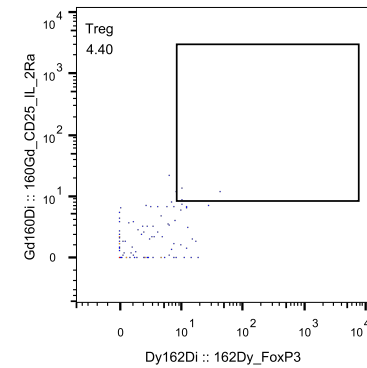

3353\_T076.fcs  
CD4+  
91.0

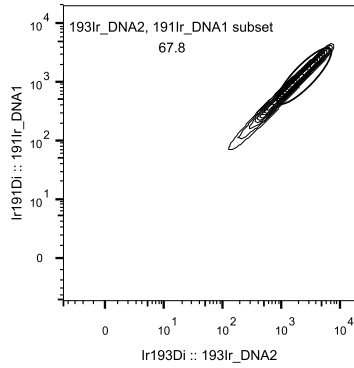

3353\_T077.fcs  
Ungated  
240768

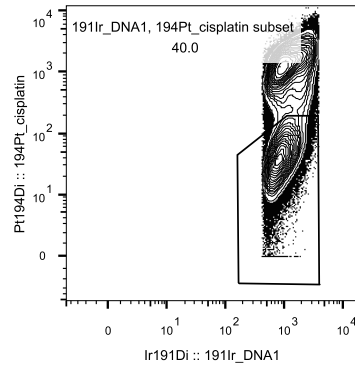

3353\_T077.fcs  
193Ir\_DNA2, 191Ir\_DNA1 subset  
163127

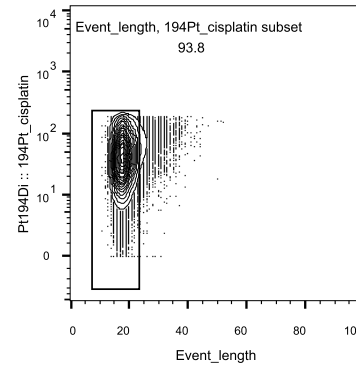

3353\_T077.fcs  
191Ir\_DNA1, 194Pt\_cisplatin subset  
65225

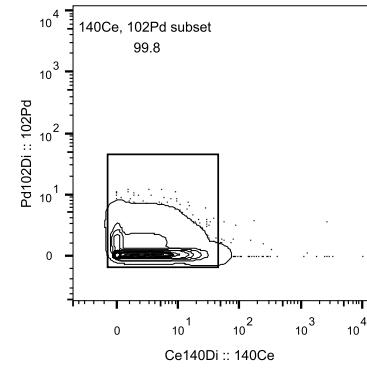

3353\_T077.fcs  
Event\_length, 194Pt\_cisplatin subset  
61193

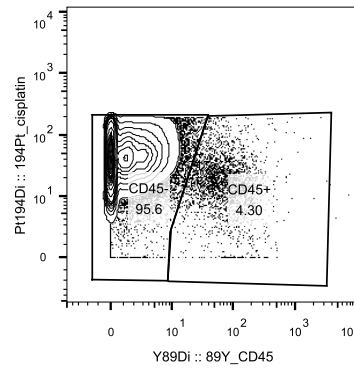

3353\_T077.fcs  
140Ce, 102Pd subset  
61078

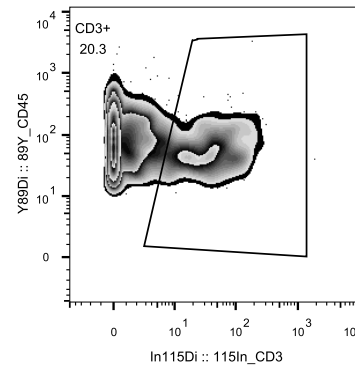

3353\_T077.fcs  
CD45+  
2628

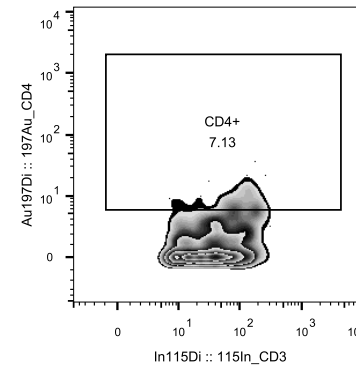

3353\_T077.fcs  
CD3+  
533

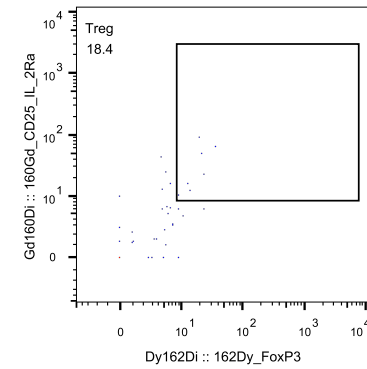

3353\_T077.fcs  
CD4+  
38.0

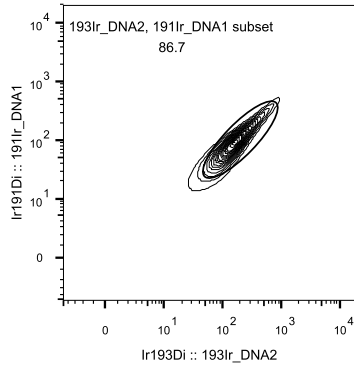

3353\_T078.fcs  
Ungated  
8.30E5

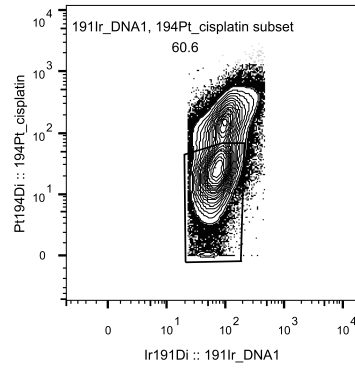

3353\_T078.fcs  
193Ir\_DNA2, 191Ir\_DNA1 subset  
7.19E5

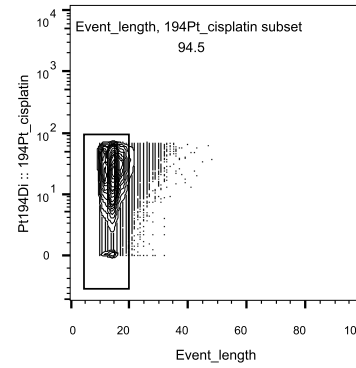

3353\_T078.fcs  
191Ir\_DNA1, 194Pt\_cisplatin subset  
4.36E5

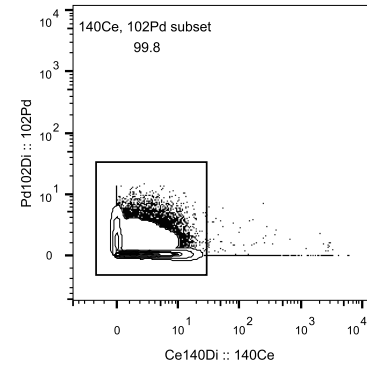

3353\_T078.fcs  
Event\_length, 194Pt\_cisplatin subset  
4.12E5

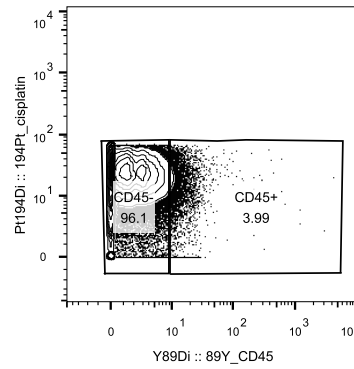

3353\_T078.fcs  
140Ce, 102Pd subset  
4.11E5

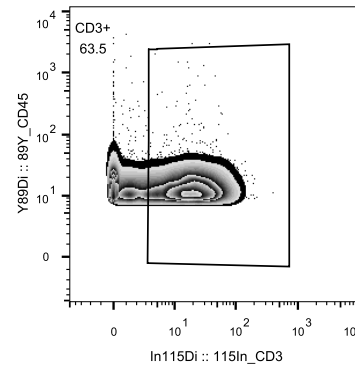

3353\_T078.fcs  
CD45+  
16378

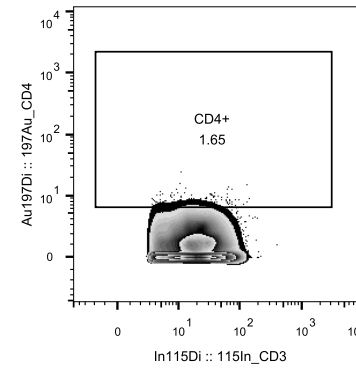

3353\_T078.fcs  
CD3+  
10407

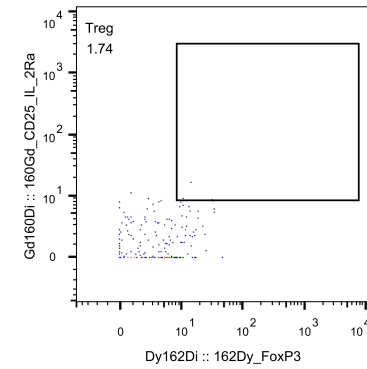

3353\_T078.fcs  
CD4+  
172

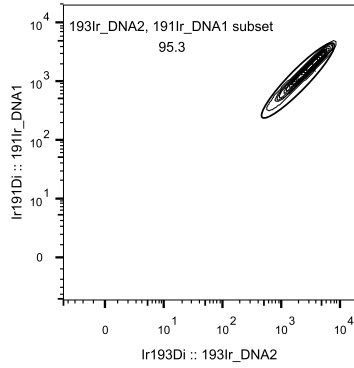

3353\_T079.fcs  
 Ungated  
 128774

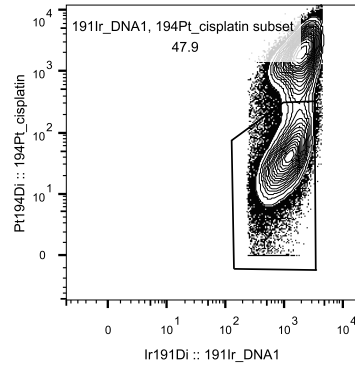

3353\_T079.fcs  
 193Ir\_DNA2, 191Ir\_DNA1 subset  
 122671

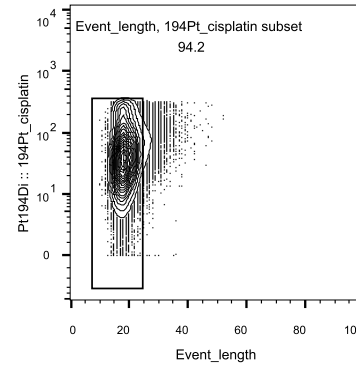

3353\_T079.fcs  
 191Ir\_DNA1, 194Pt\_cisplatin subset  
 58699

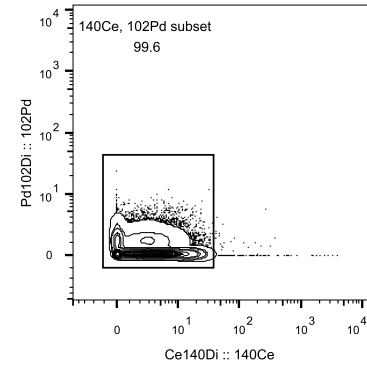

3353\_T079.fcs  
 Event\_length, 194Pt\_cisplatin subset  
 55299

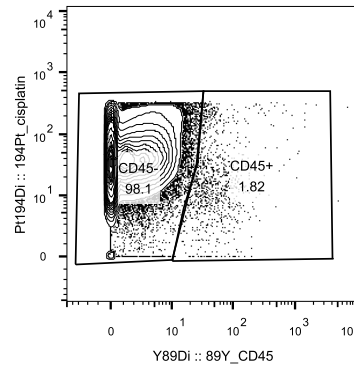

3353\_T079.fcs  
 140Ce, 102Pd subset  
 55084

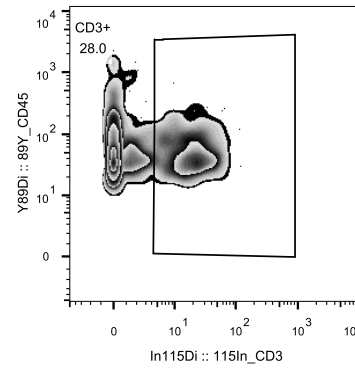

3353\_T079.fcs  
 CD45+  
 1004

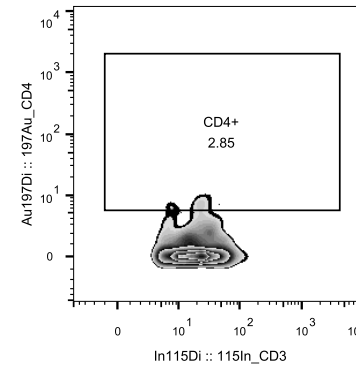

3353\_T079.fcs  
 CD3+  
 281

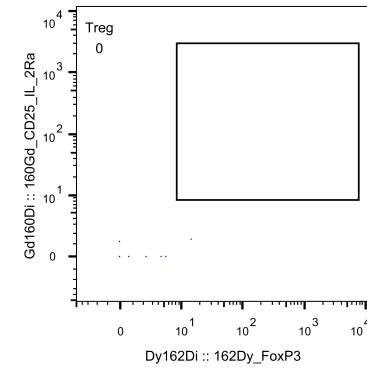

3353\_T079.fcs  
 CD4+  
 8.00

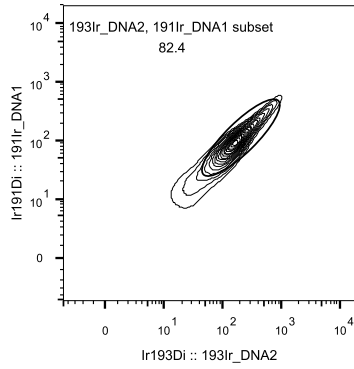

3353\_T080.fcs  
Ungated  
5.52E5

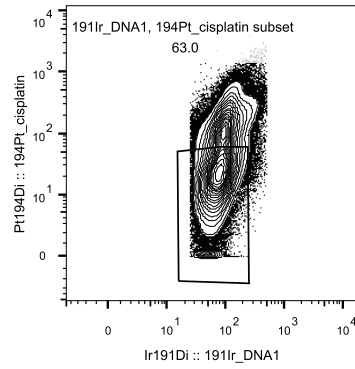

3353\_T080.fcs  
193Ir\_DNA2, 191Ir\_DNA1 subset  
4.55E5

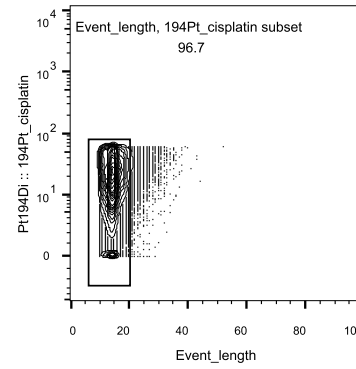

3353\_T080.fcs  
191Ir\_DNA1, 194Pt\_cisplatin subset  
286448

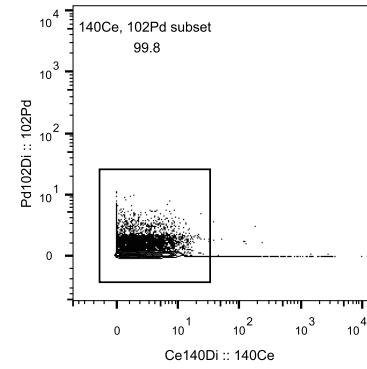

3353\_T080.fcs  
Event\_length, 194Pt\_cisplatin subset  
276886

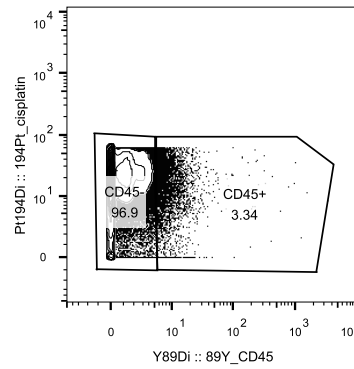

3353\_T080.fcs  
140Ce, 102Pd subset  
276469

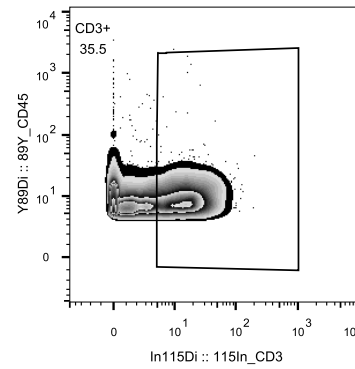

3353\_T080.fcs  
CD45+  
9236

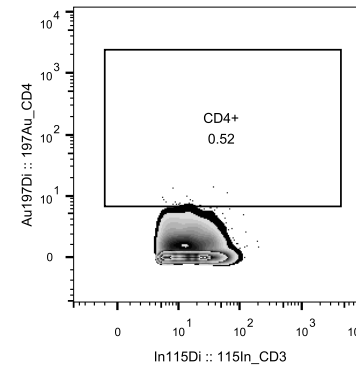

3353\_T080.fcs  
CD3+  
3275

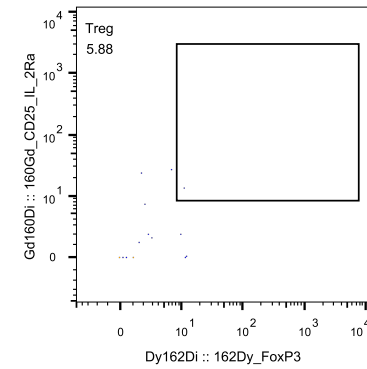

3353\_T080.fcs  
CD4+  
17.0

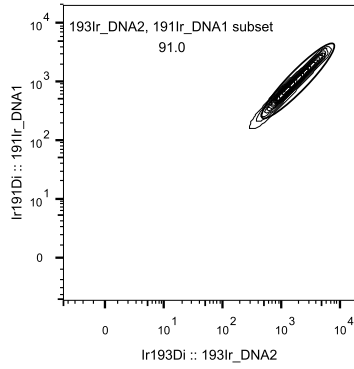

3363\_T083.fcs  
Ungated  
94309

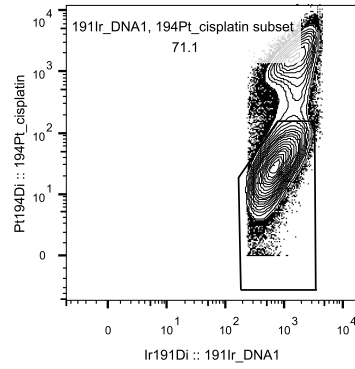

3363\_T083.fcs  
193Ir\_DNA2, 191Ir\_DNA1 subset  
85857

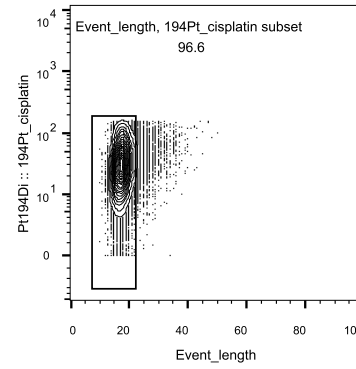

3363\_T083.fcs  
191Ir\_DNA1, 194Pt\_cisplatin subset  
61065

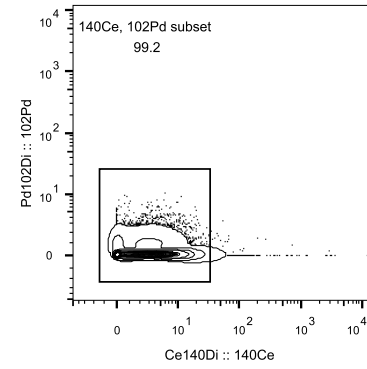

3363\_T083.fcs  
Event\_length, 194Pt\_cisplatin subset  
59000

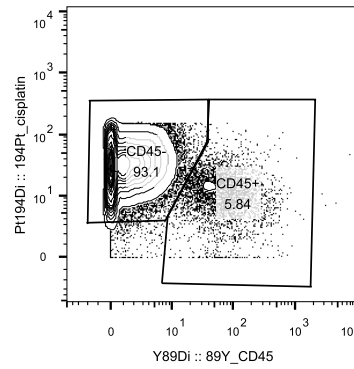

3363\_T083.fcs  
140Ce, 102Pd subset  
58551

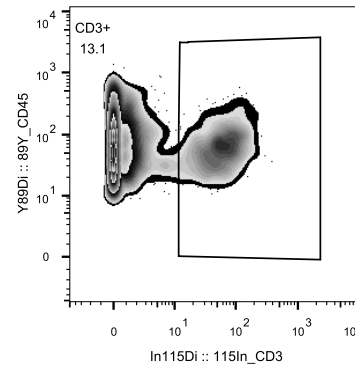

3363\_T083.fcs  
CD45+  
3421

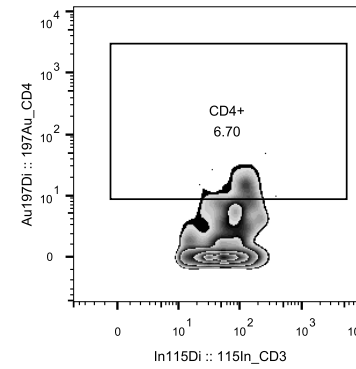

3363\_T083.fcs  
CD3+  
448

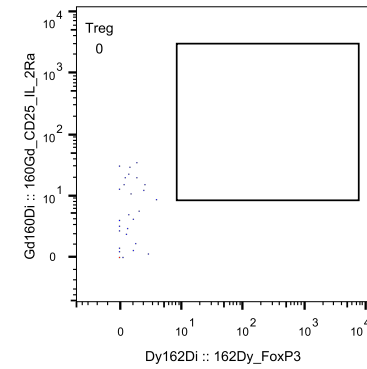

3363\_T083.fcs  
CD4+  
30.0

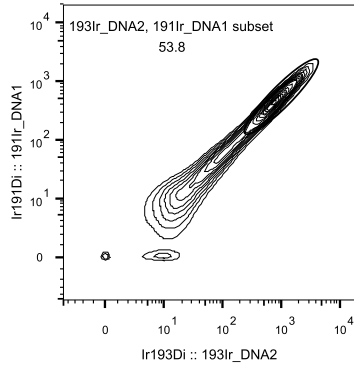

3363\_T084.fcs  
Ungated  
124922

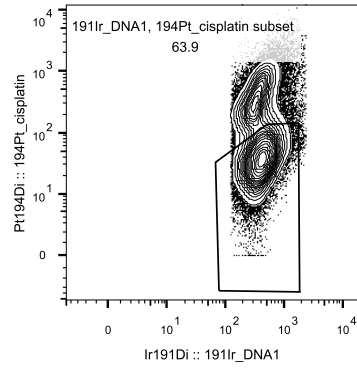

3363\_T084.fcs  
193Ir\_DNA2, 191Ir\_DNA1 subset  
67208

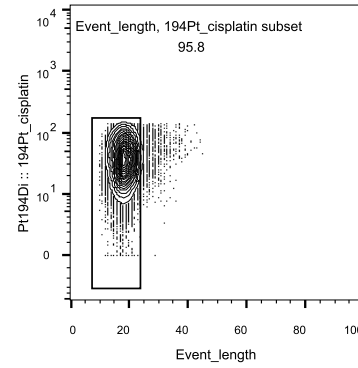

3363\_T084.fcs  
191Ir\_DNA1, 194Pt\_cisplatin subset  
42916

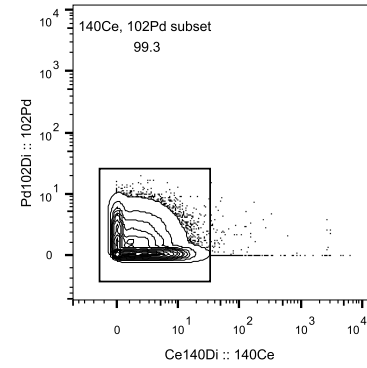

3363\_T084.fcs  
Event\_length, 194Pt\_cisplatin subset  
41113

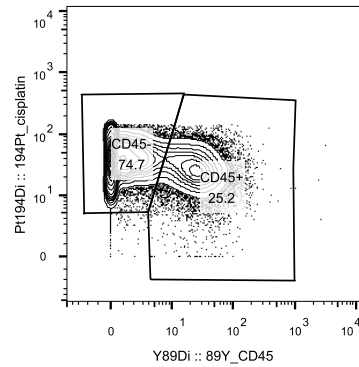

3363\_T084.fcs  
140Ce, 102Pd subset  
40842

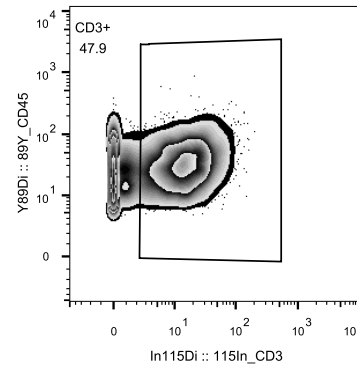

3363\_T084.fcs  
CD45+  
10272

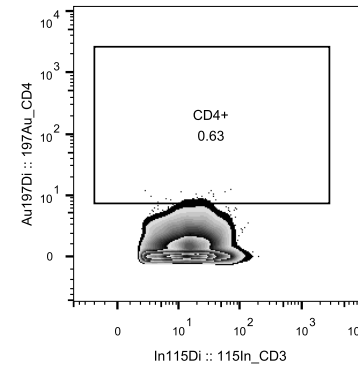

3363\_T084.fcs  
CD3+  
4920

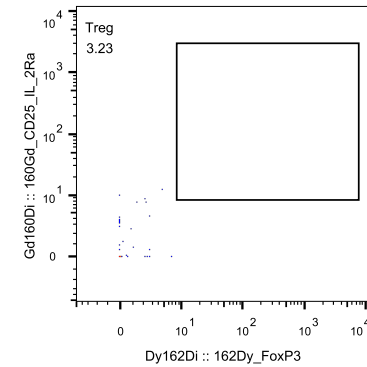

3363\_T084.fcs  
CD4+  
31.0

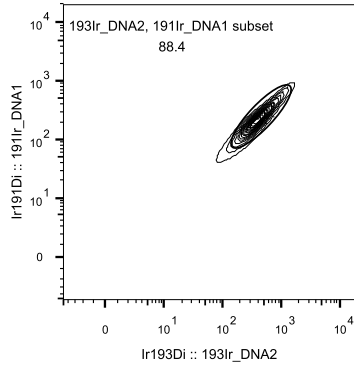

3364\_T082.fcs  
Ungated  
217720

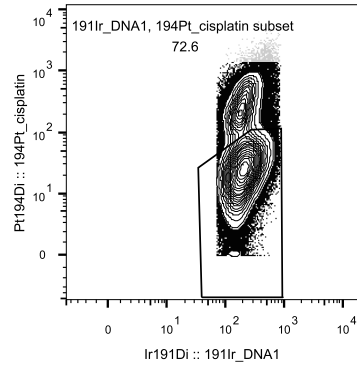

3364\_T082.fcs  
193Ir\_DNA2, 191Ir\_DNA1 subset  
192557

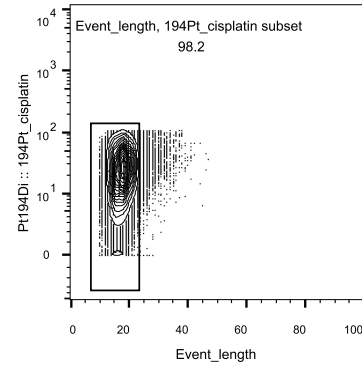

3364\_T082.fcs  
191Ir\_DNA1, 194Pt\_cisplatin subset  
139846

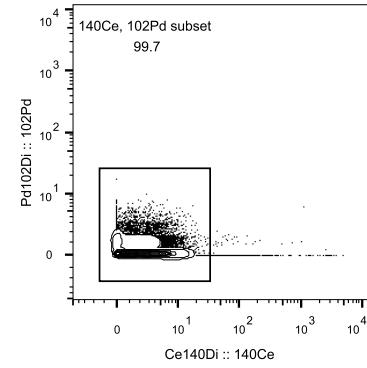

3364\_T082.fcs  
Event\_length, 194Pt\_cisplatin subset  
137287

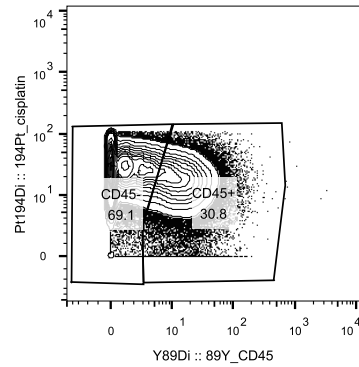

3364\_T082.fcs  
140Ce, 102Pd subset  
136893

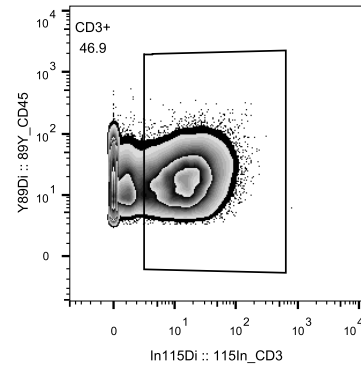

3364\_T082.fcs  
CD45+  
42222

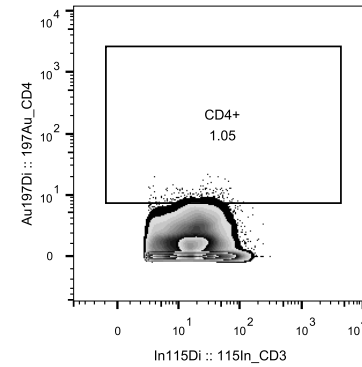

3364\_T082.fcs  
CD3+  
19811

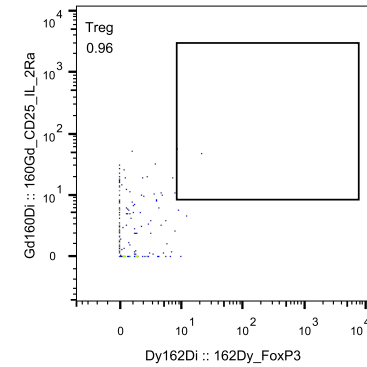

3364\_T082.fcs  
CD4+  
209



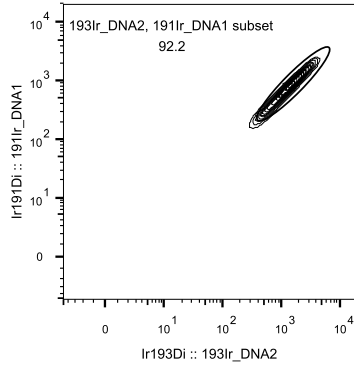

3364\_T085.fcs  
Ungated  
66305

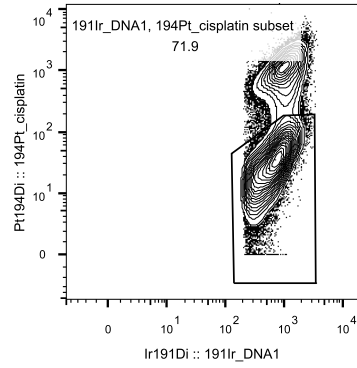

3364\_T085.fcs  
193Ir\_DNA2, 191Ir\_DNA1 subset  
61150

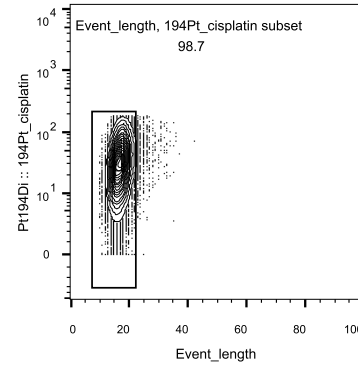

3364\_T085.fcs  
191Ir\_DNA1, 194Pt\_cisplatin subset  
43986

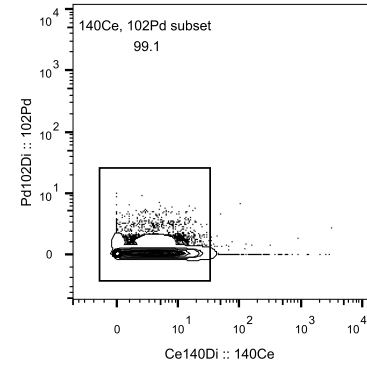

3364\_T085.fcs  
Event\_length, 194Pt\_cisplatin subset  
43418

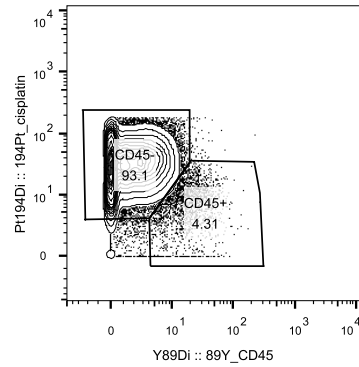

3364\_T085.fcs  
140Ce, 102Pd subset  
43047

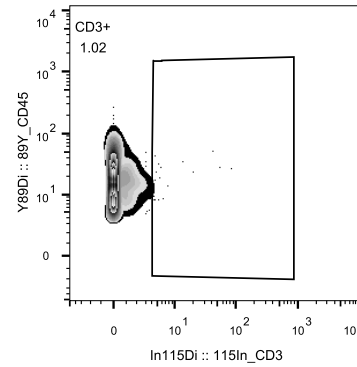

3364\_T085.fcs  
CD45+  
1856

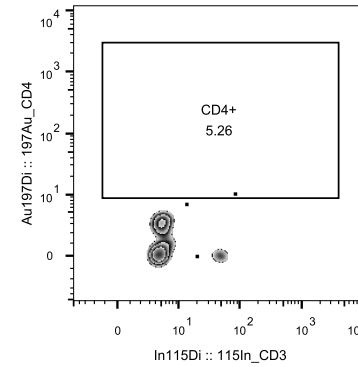

3364\_T085.fcs  
CD3+  
19.0

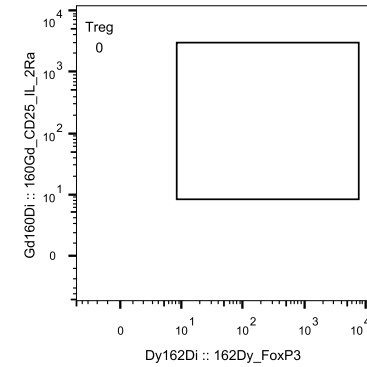

3364\_T085.fcs  
CD4+  
1.00

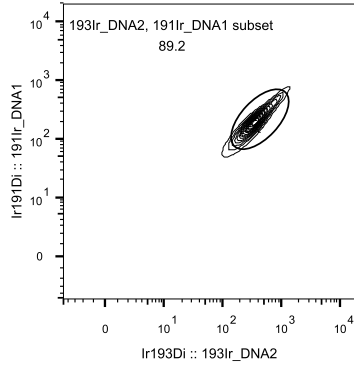

3364\_T086.fcs  
Ungated  
4.34E5

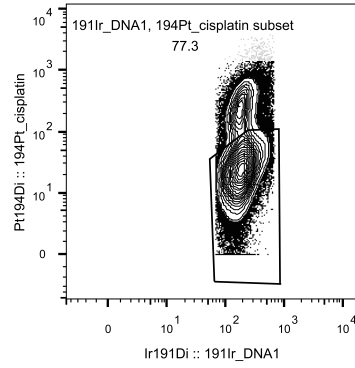

3364\_T086.fcs  
193Ir\_DNA2, 191Ir\_DNA1 subset  
386566

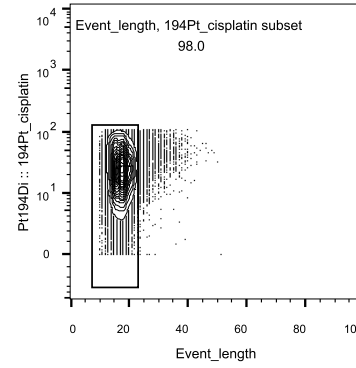

3364\_T086.fcs  
191Ir\_DNA1, 194Pt\_cisplatin subset  
298870

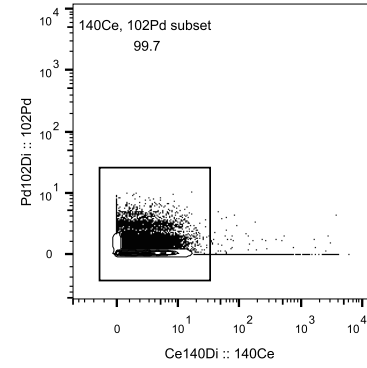

3364\_T086.fcs  
Event\_length, 194Pt\_cisplatin subset  
292943

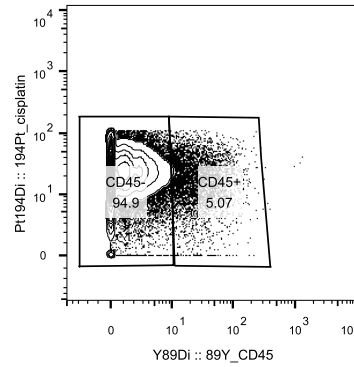

3364\_T086.fcs  
140Ce, 102Pd subset  
292144

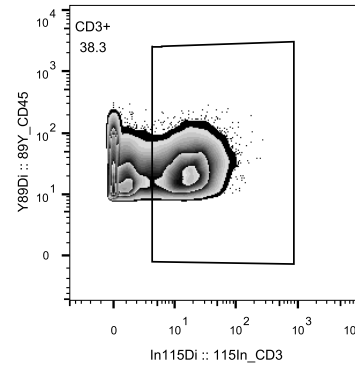

3364\_T086.fcs  
CD45+  
14808

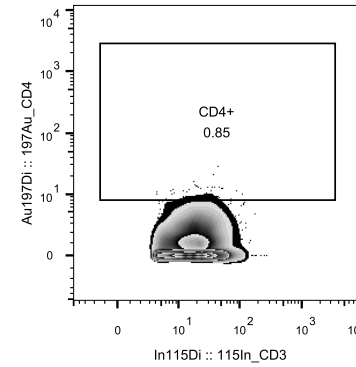

3364\_T086.fcs  
CD3+  
5668

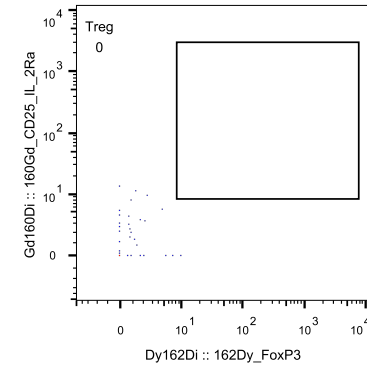

3364\_T086.fcs  
CD4+  
48.0

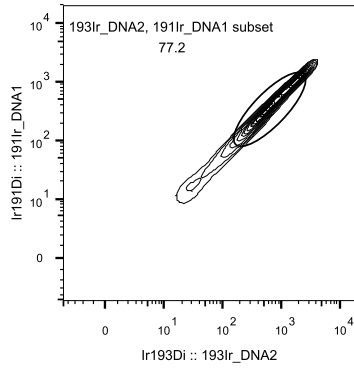

3415\_T087.fcs  
Ungated  
4.47E5

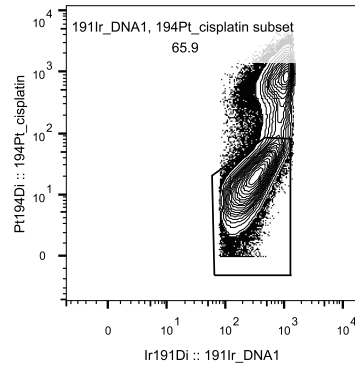

3415\_T087.fcs  
193Ir\_DNA2, 191Ir\_DNA1 subset  
345108

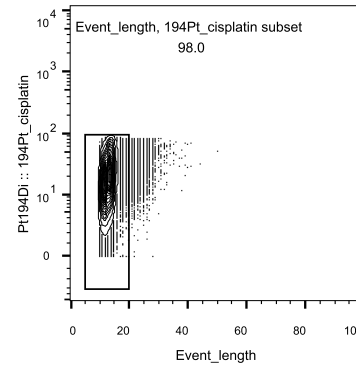

3415\_T087.fcs  
191Ir\_DNA1, 194Pt\_cisplatin subset  
227561

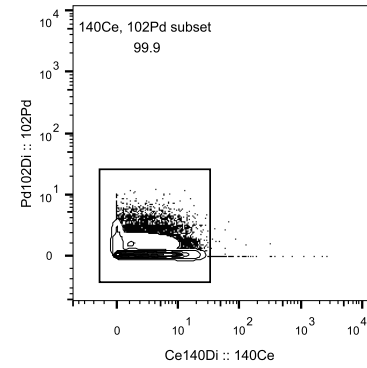

3415\_T087.fcs  
Event\_length, 194Pt\_cisplatin subset  
223071

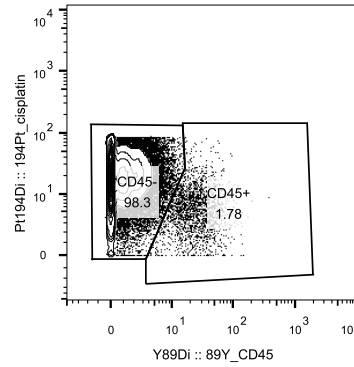

3415\_T087.fcs  
140Ce, 102Pd subset  
222897

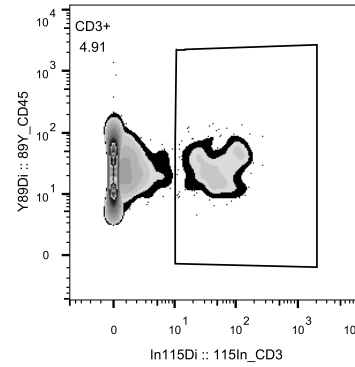

3415\_T087.fcs  
CD45+  
3973

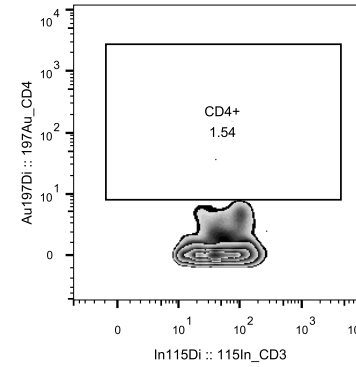

3415\_T087.fcs  
CD3+  
195

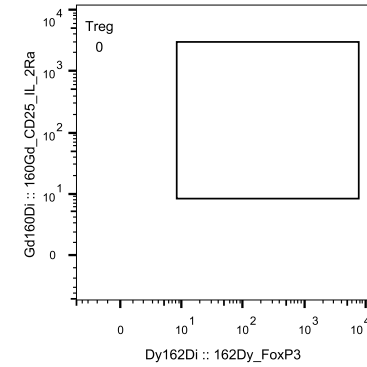

3415\_T087.fcs  
CD4+  
3.00

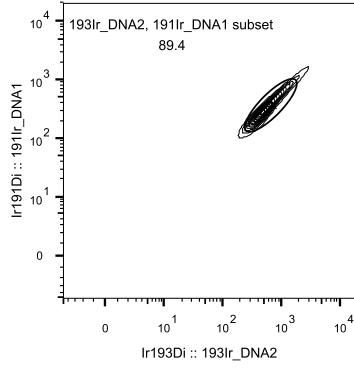

3416\_T088.fcs  
Ungated  
343762

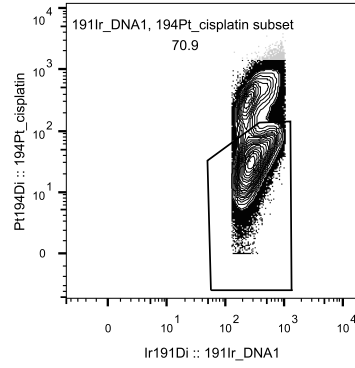

3416\_T088.fcs  
193Ir\_DNA2, 191Ir\_DNA1 subset  
307154

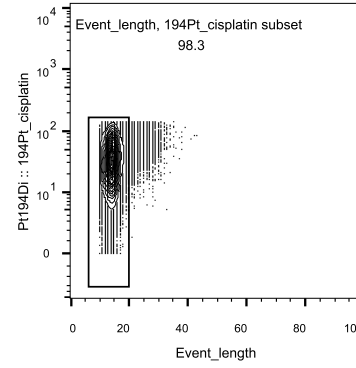

3416\_T088.fcs  
191Ir\_DNA1, 194Pt\_cisplatin subset  
217666

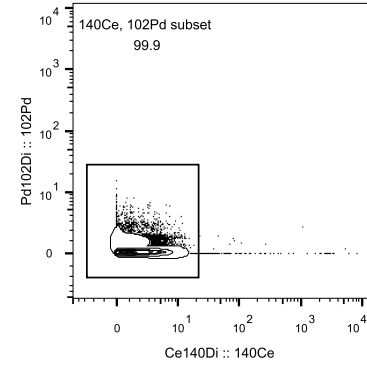

3416\_T088.fcs  
Event\_length, 194Pt\_cisplatin subset  
214057

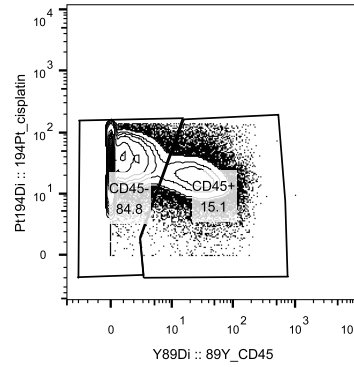

3416\_T088.fcs  
140Ce, 102Pd subset  
213897

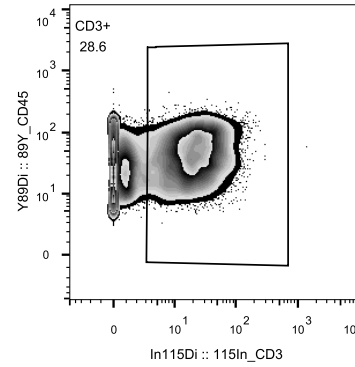

3416\_T088.fcs  
CD45+  
32200

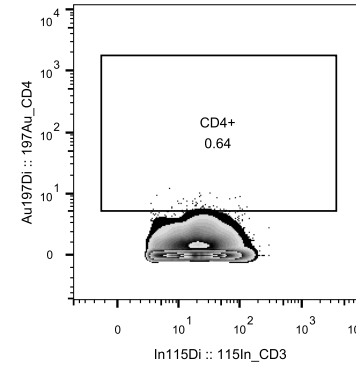

3416\_T088.fcs  
CD3+  
9225

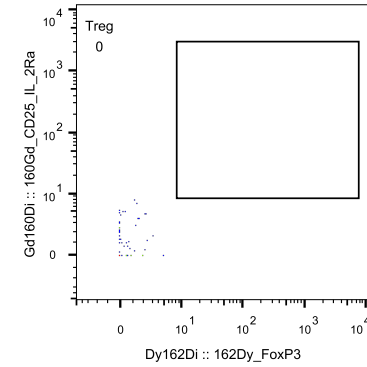

3416\_T088.fcs  
CD4+  
59.0

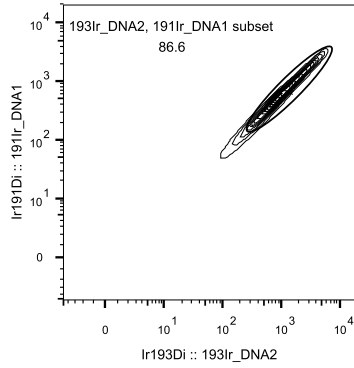

3443\_T089.fcs  
Ungated  
4.75E5

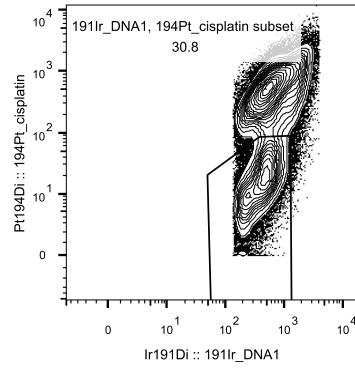

3443\_T089.fcs  
193Ir\_DNA2, 191Ir\_DNA1 subset  
4.11E5

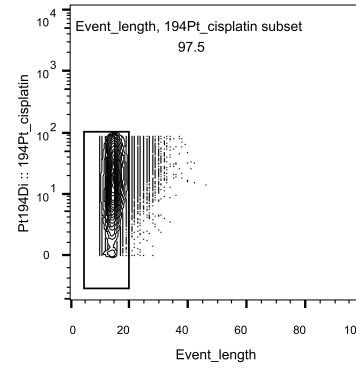

3443\_T089.fcs  
191Ir\_DNA1, 194Pt\_cisplatin subset  
126663

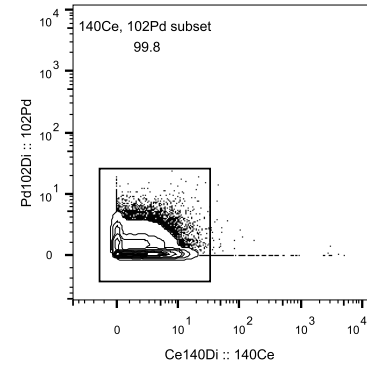

3443\_T089.fcs  
Event\_length, 194Pt\_cisplatin subset  
123495

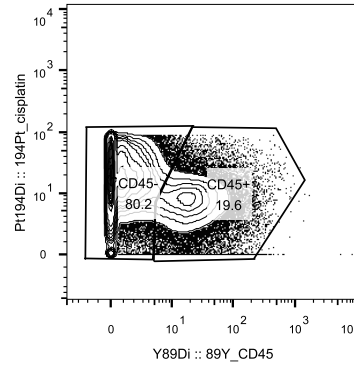

3443\_T089.fcs  
140Ce, 102Pd subset  
123251

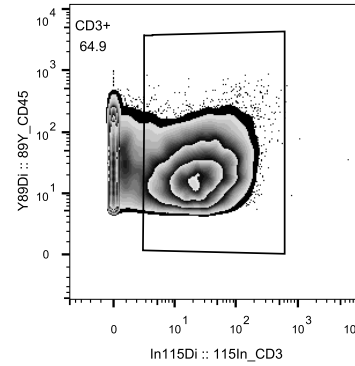

3443\_T089.fcs  
CD45+  
24206

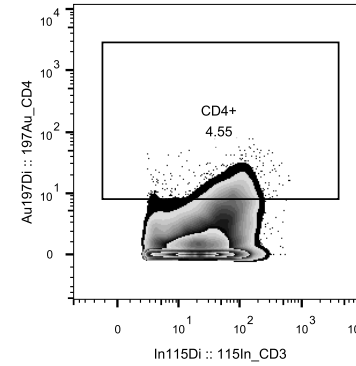

3443\_T089.fcs  
CD3+  
15705

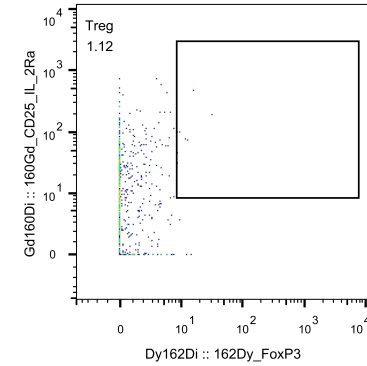

3443\_T089.fcs  
CD4+  
714

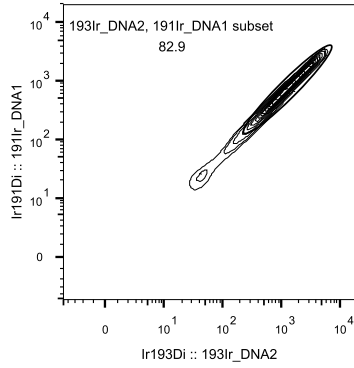

3477\_T093.fcs  
Ungated  
358499

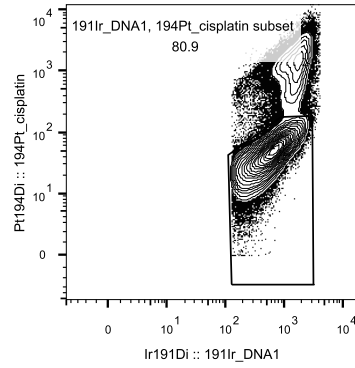

3477\_T093.fcs  
193Ir\_DNA2, 191Ir\_DNA1 subset  
297354

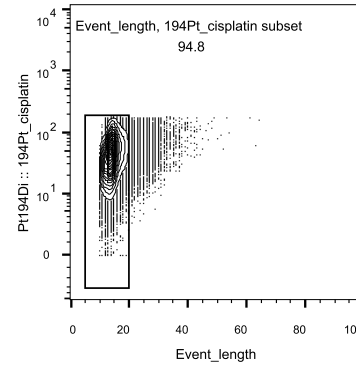

3477\_T093.fcs  
191Ir\_DNA1, 194Pt\_cisplatin subset  
240541

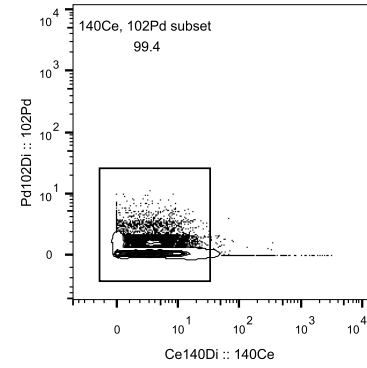

3477\_T093.fcs  
Event\_length, 194Pt\_cisplatin subset  
228066

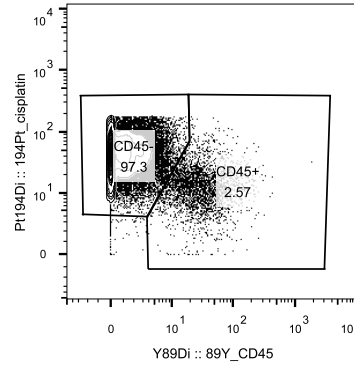

3477\_T093.fcs  
140Ce, 102Pd subset  
226692

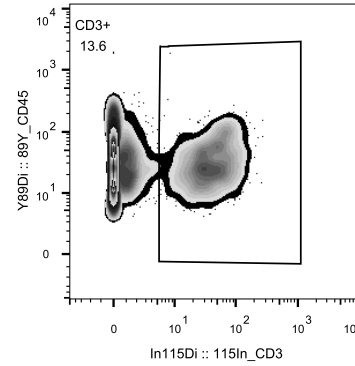

3477\_T093.fcs  
CD45+  
5828

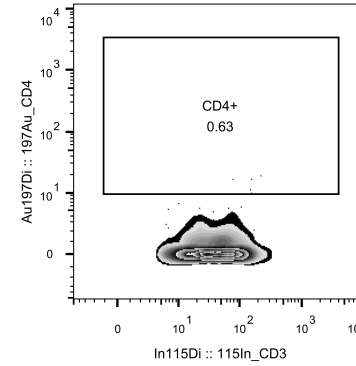

3477\_T093.fcs  
CD3+  
793

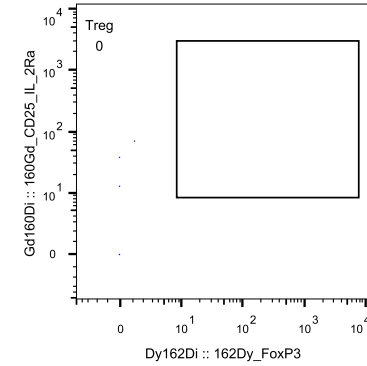

3477\_T093.fcs  
CD4+  
5.00

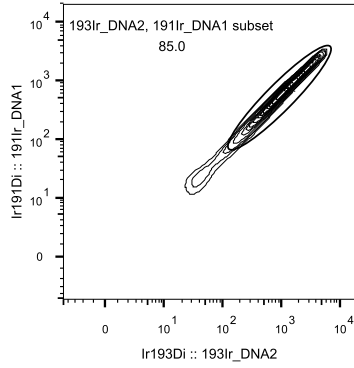

3478\_T095.fcs  
Ungated  
366800

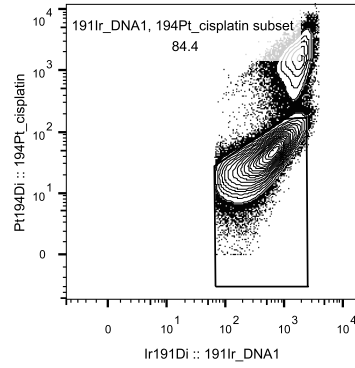

3478\_T095.fcs  
193Ir\_DNA2, 191Ir\_DNA1 subset  
311702

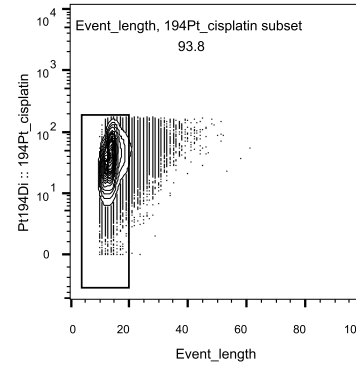

3478\_T095.fcs  
191Ir\_DNA1, 194Pt\_cisplatin subset  
263028

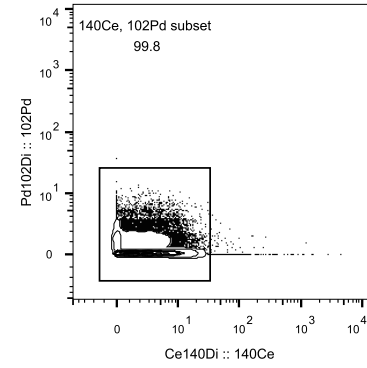

3478\_T095.fcs  
Event\_length, 194Pt\_cisplatin subset  
246716

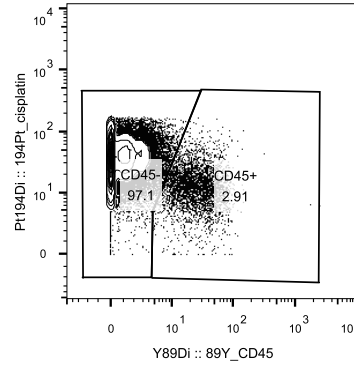

3478\_T095.fcs  
140Ce, 102Pd subset  
246225

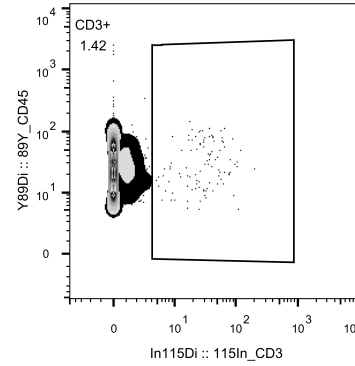

3478\_T095.fcs  
CD45+  
7162

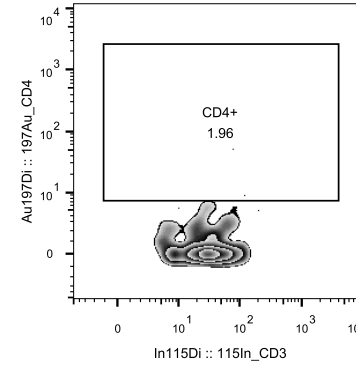

3478\_T095.fcs  
CD3+  
102

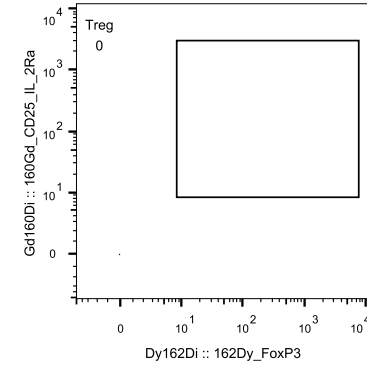

3478\_T095.fcs  
CD4+  
2.00

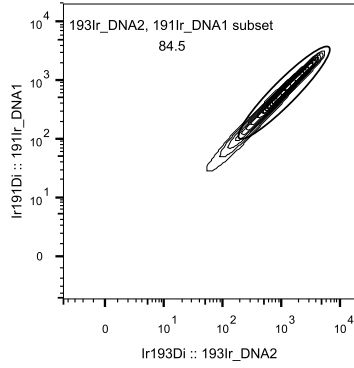

3479\_T091.fcs  
Ungated  
5.20E5

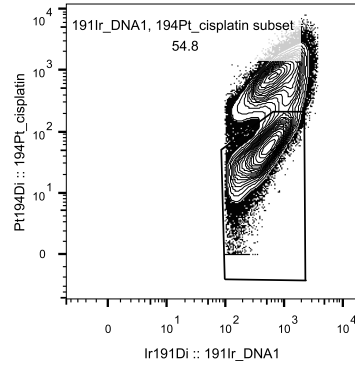

3479\_T091.fcs  
193Ir\_DNA2, 191Ir\_DNA1 subset  
4.40E5

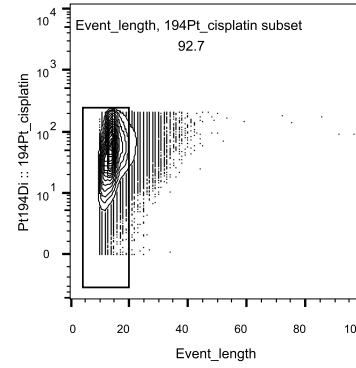

3479\_T091.fcs  
191Ir\_DNA1, 194Pt\_cisplatin subset  
240974

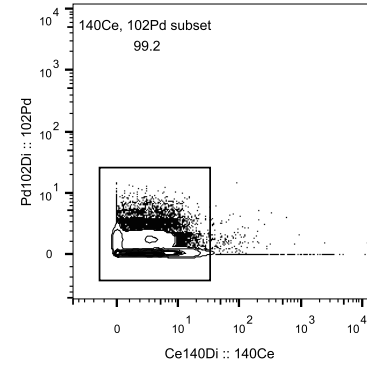

3479\_T091.fcs  
Event\_length, 194Pt\_cisplatin subset  
223388

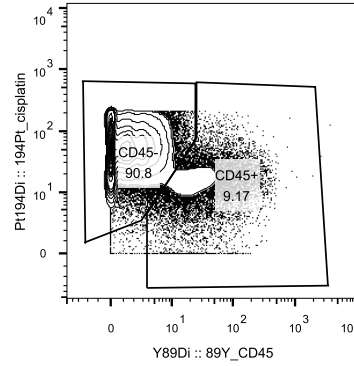

3479\_T091.fcs  
140Ce, 102Pd subset  
221698

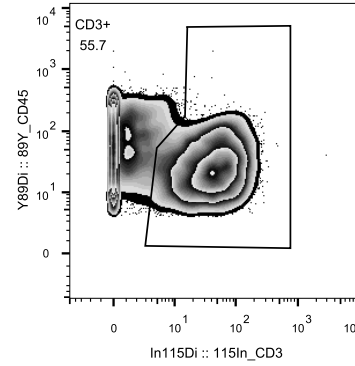

3479\_T091.fcs  
CD45+  
20329

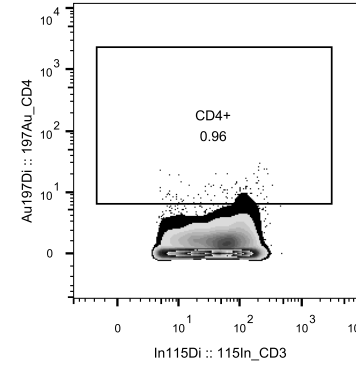

3479\_T091.fcs  
CD3+  
11330

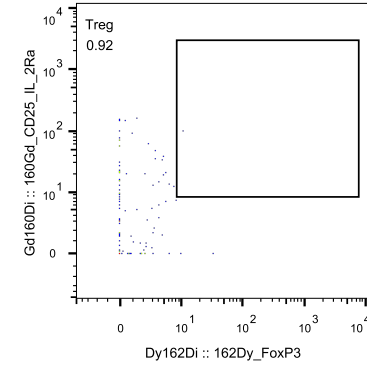

3479\_T091.fcs  
CD4+  
109



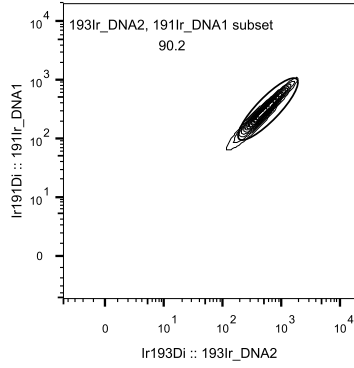

3479\_T092.fcs  
Ungated  
7.34E5

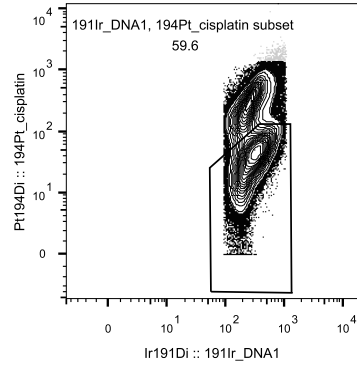

3479\_T092.fcs  
193Ir\_DNA2, 191Ir\_DNA1 subset  
6.62E5

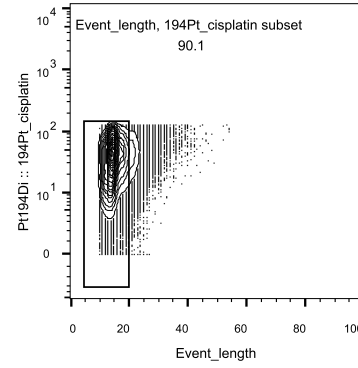

3479\_T092.fcs  
191Ir\_DNA1, 194Pt\_cisplatin subset  
394066

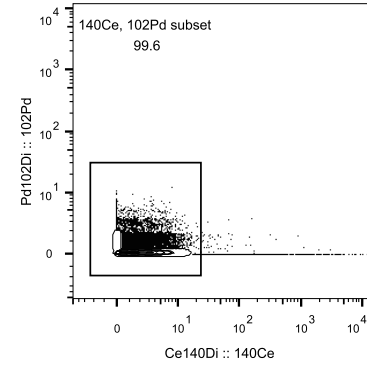

3479\_T092.fcs  
Event\_length, 194Pt\_cisplatin subset  
355013

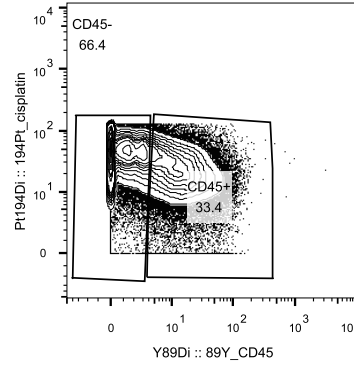

3479\_T092.fcs  
140Ce, 102Pd subset  
353677

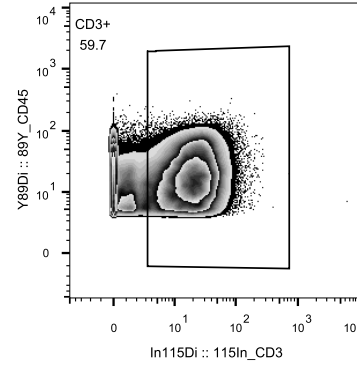

3479\_T092.fcs  
CD45+  
118256

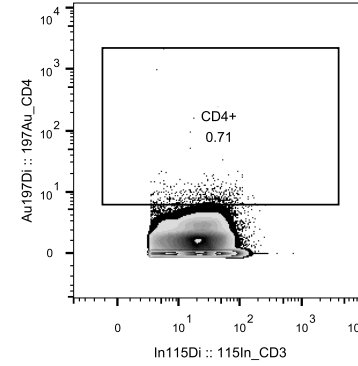

3479\_T092.fcs  
CD3+  
70579

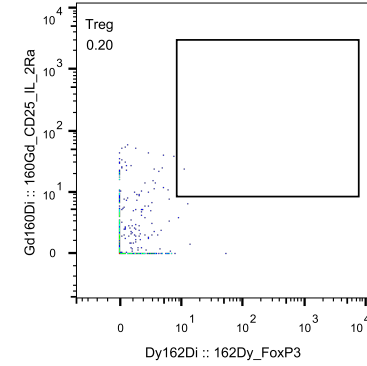

3479\_T092.fcs  
CD4+  
498

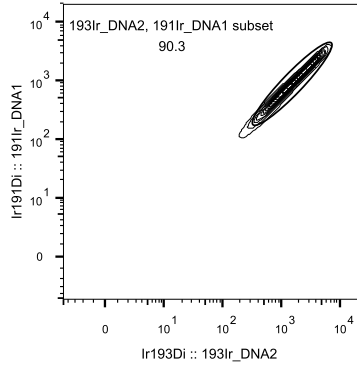

3532\_T097.fcs  
Ungated  
266265

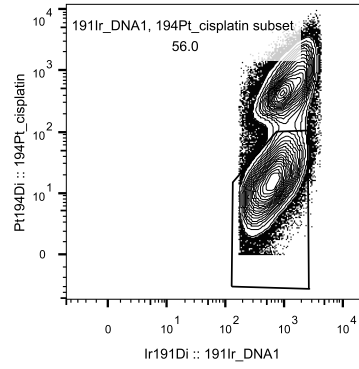

3532\_T097.fcs  
193Ir\_DNA2, 191Ir\_DNA1 subset  
240367

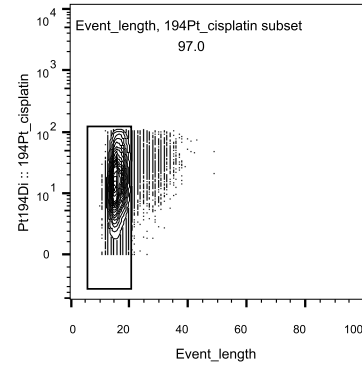

3532\_T097.fcs  
191Ir\_DNA1, 194Pt\_cisplatin subset  
134675

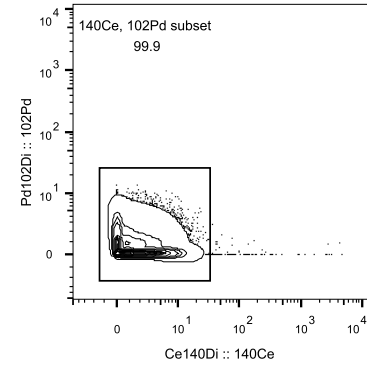

3532\_T097.fcs  
Event\_length, 194Pt\_cisplatin subset  
130600

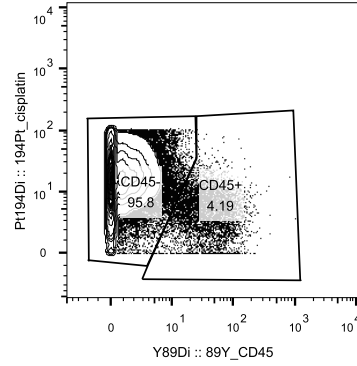

3532\_T097.fcs  
140Ce, 102Pd subset  
130482

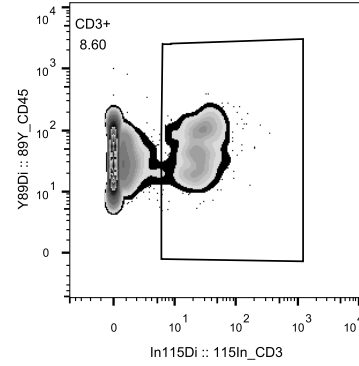

3532\_T097.fcs  
CD45+  
5462

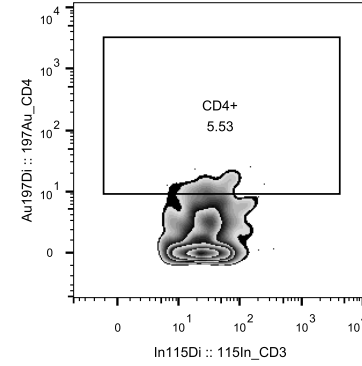

3532\_T097.fcs  
CD3+  
470

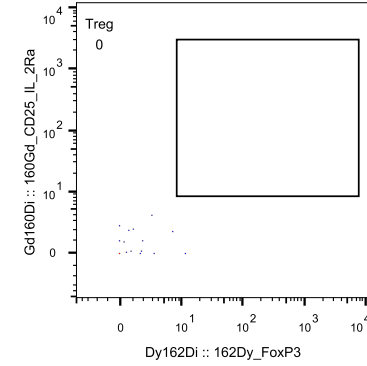

3532\_T097.fcs  
CD4+  
26.0

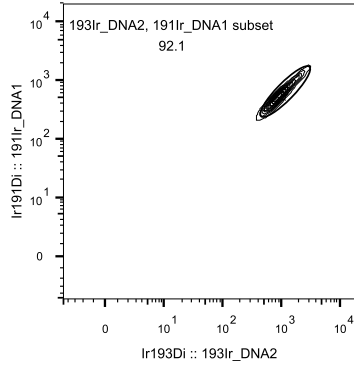

3533\_T098.fcs  
Ungated  
5.49E5

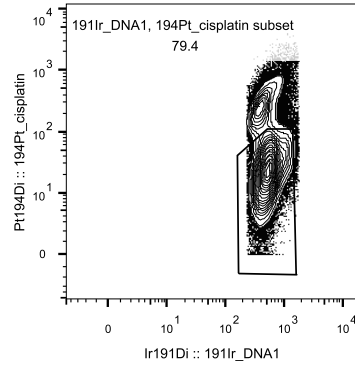

3533\_T098.fcs  
193Ir\_DNA2, 191Ir\_DNA1 subset  
5.05E5

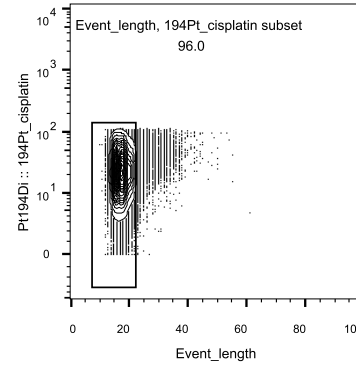

3533\_T098.fcs  
191Ir\_DNA1, 194Pt\_cisplatin subset  
4.01E5

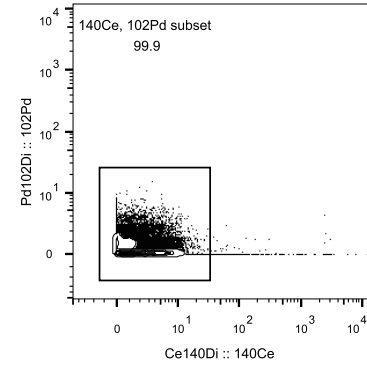

3533\_T098.fcs  
Event\_length, 194Pt\_cisplatin subset  
385129

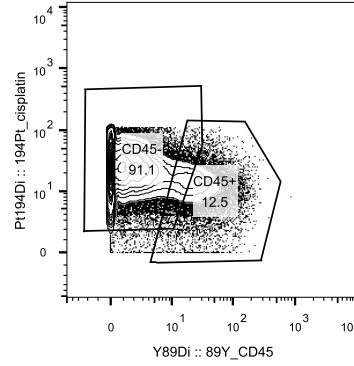

3533\_T098.fcs  
140Ce, 102Pd subset  
384815

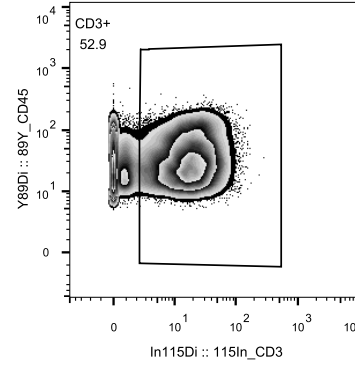

3533\_T098.fcs  
CD45+  
47915

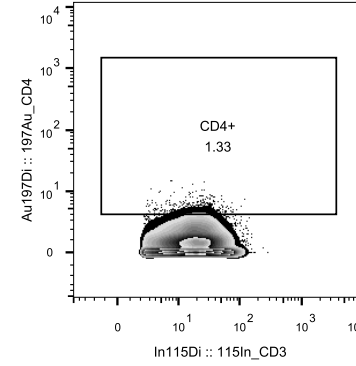

3533\_T098.fcs  
CD3+  
25333

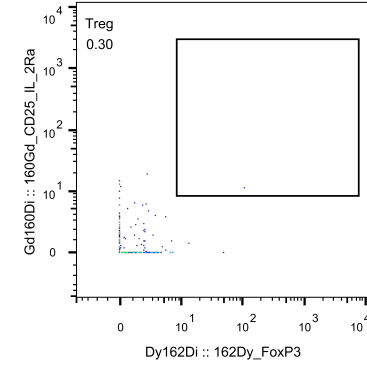

3533\_T098.fcs  
CD4+  
336

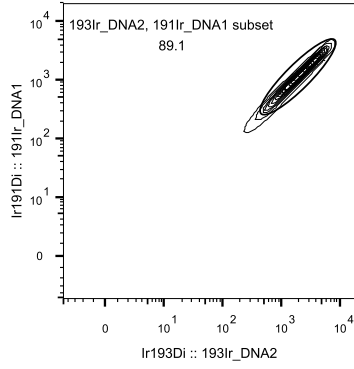

3533\_T099.fcs  
Ungated  
136401

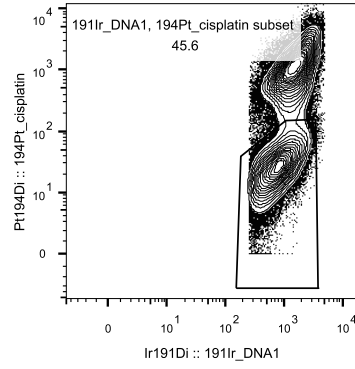

3533\_T099.fcs  
193Ir\_DNA2, 191Ir\_DNA1 subset  
121497

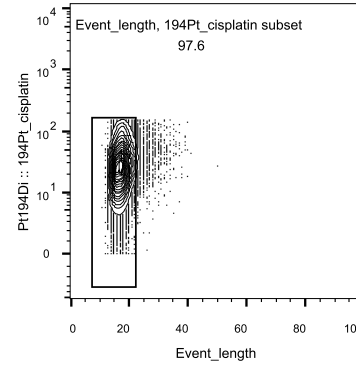

3533\_T099.fcs  
191Ir\_DNA1, 194Pt\_cisplatin subset  
55450

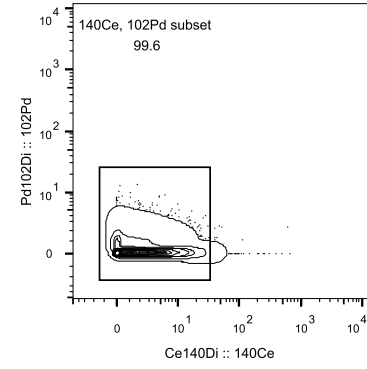

3533\_T099.fcs  
Event\_length, 194Pt\_cisplatin subset  
54098

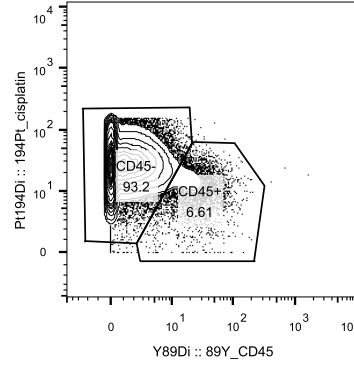

3533\_T099.fcs  
140Ce, 102Pd subset  
53873

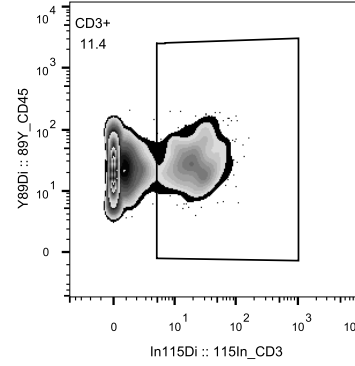

3533\_T099.fcs  
CD45+  
3562

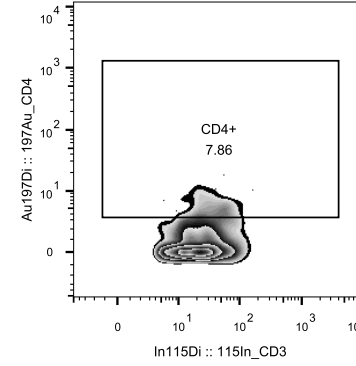

3533\_T099.fcs  
CD3+  
407

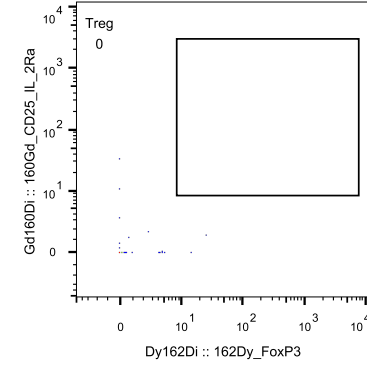

3533\_T099.fcs  
CD4+  
32.0

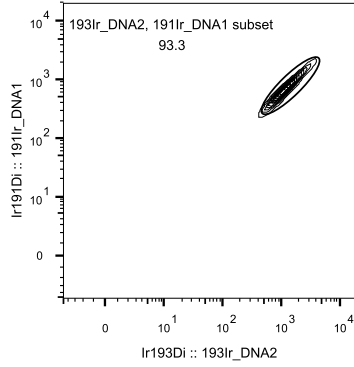

3533\_T100.fcs  
Ungated  
374694

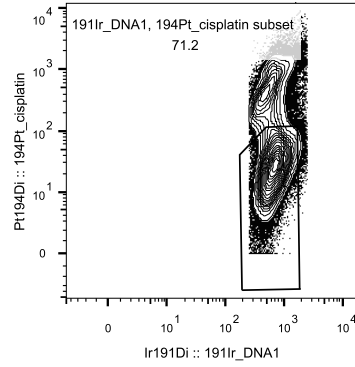

3533\_T100.fcs  
193Ir\_DNA2, 191Ir\_DNA1 subset  
349433

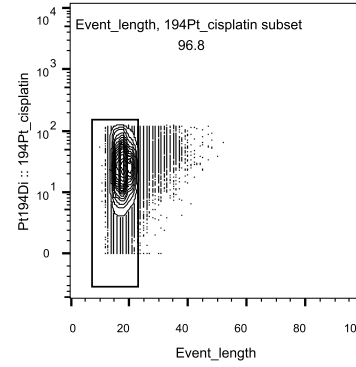

3533\_T100.fcs  
191Ir\_DNA1, 194Pt\_cisplatin subset  
248957

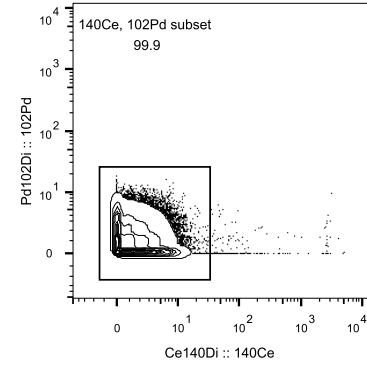

3533\_T100.fcs  
Event\_length, 194Pt\_cisplatin subset  
240891

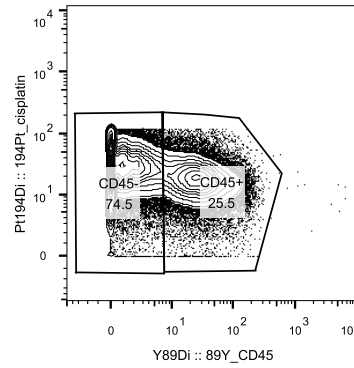

3533\_T100.fcs  
140Ce, 102Pd subset  
240644

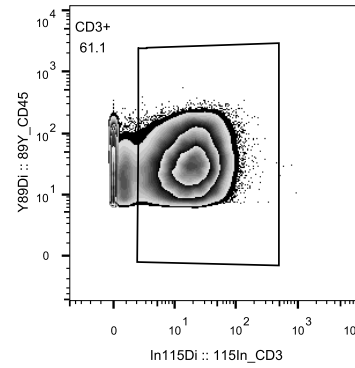

3533\_T100.fcs  
CD45+  
61345

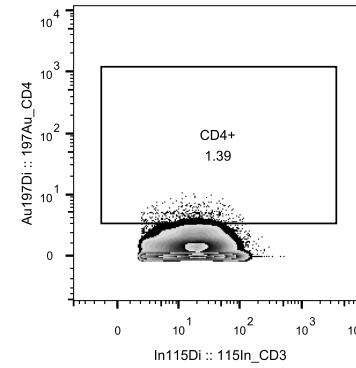

3533\_T100.fcs  
CD3+  
37455

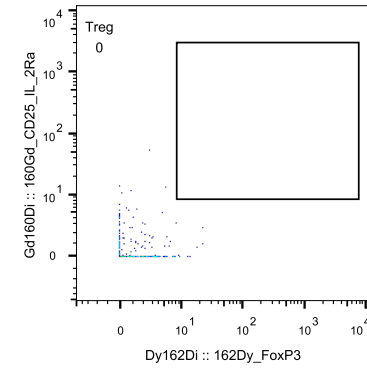

3533\_T100.fcs  
CD4+  
519

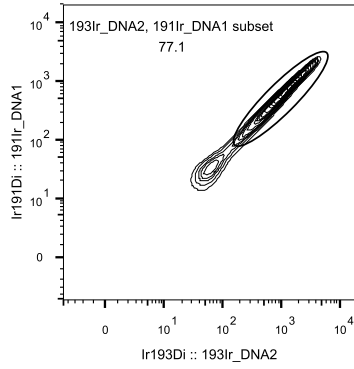

3550\_T101.fcs  
Ungated  
5.17E5

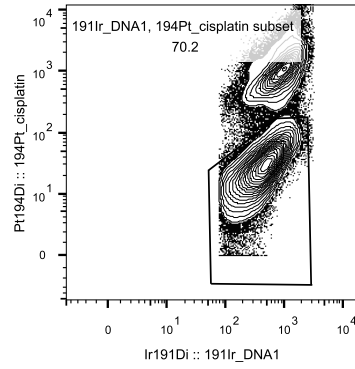

3550\_T101.fcs  
193Ir\_DNA2, 191Ir\_DNA1 subset  
399064

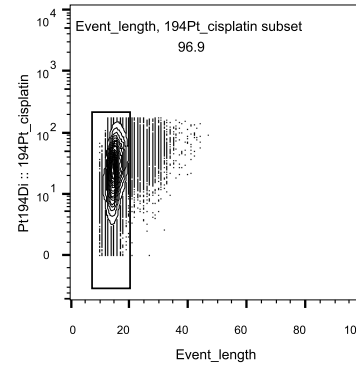

3550\_T101.fcs  
191Ir\_DNA1, 194Pt\_cisplatin subset  
280024

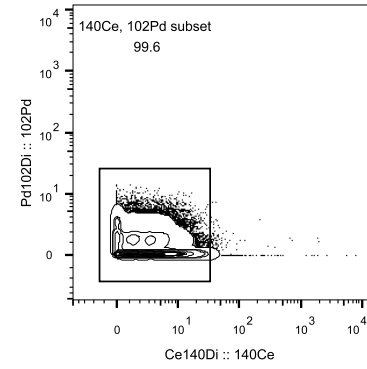

3550\_T101.fcs  
Event\_length, 194Pt\_cisplatin subset  
271324

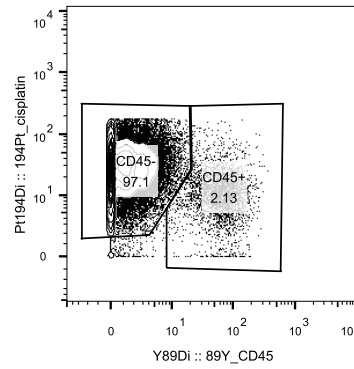

3550\_T101.fcs  
140Ce, 102Pd subset  
270374

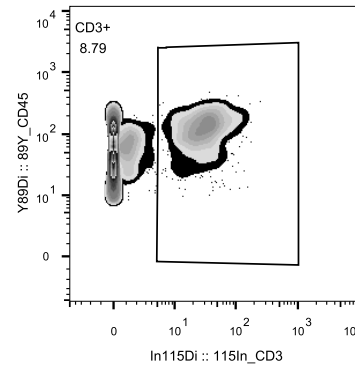

3550\_T101.fcs  
CD45+  
5755

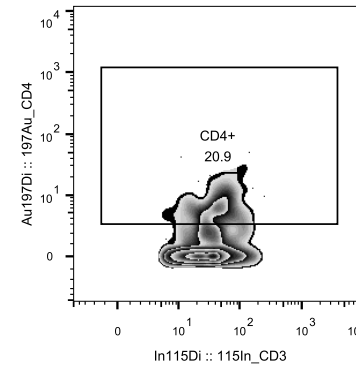

3550\_T101.fcs  
CD3+  
506

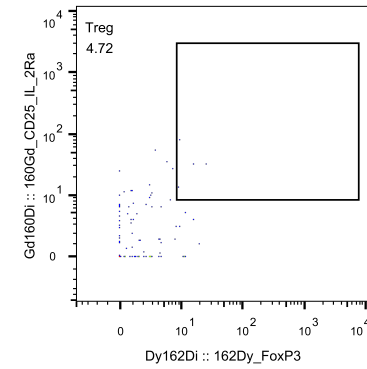

3550\_T101.fcs  
CD4+  
106

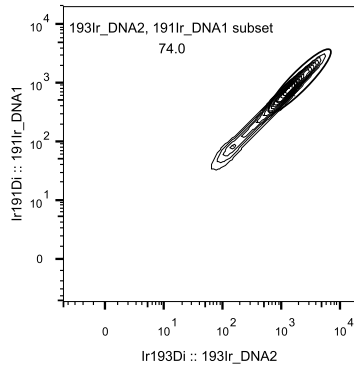

3551\_T102.fcs  
Ungated  
229675

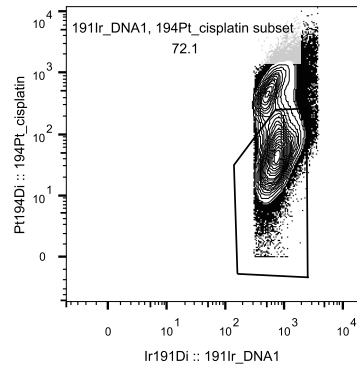

3551\_T102.fcs  
193Ir\_DNA2, 191Ir\_DNA1 subset  
170053

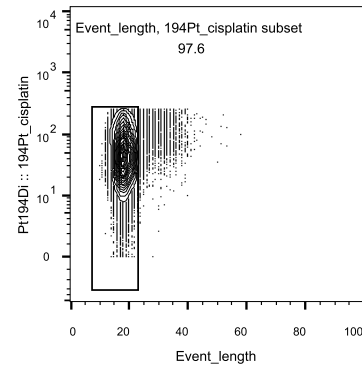

3551\_T102.fcs  
191Ir\_DNA1, 194Pt\_cisplatin subset  
122577

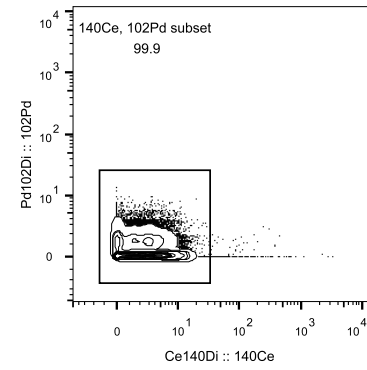

3551\_T102.fcs  
Event\_length, 194Pt\_cisplatin subset  
119580

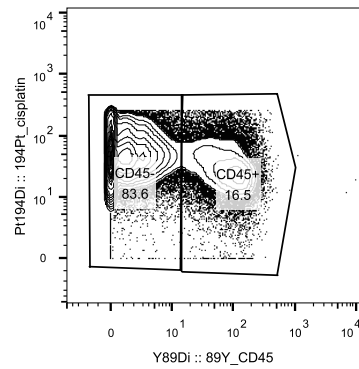

3551\_T102.fcs  
140Ce, 102Pd subset  
119425

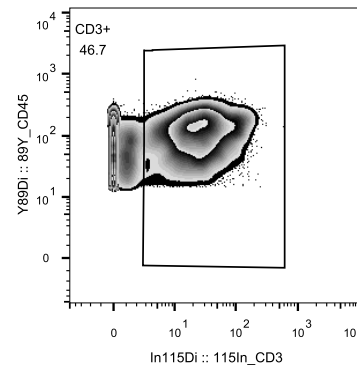

3551\_T102.fcs  
CD45+  
19691

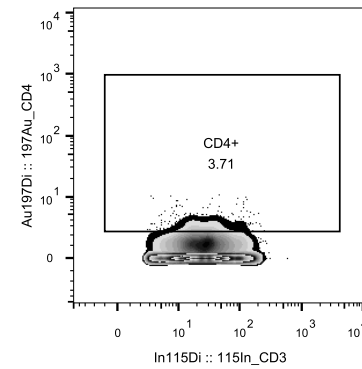

3551\_T102.fcs  
CD3+  
9198

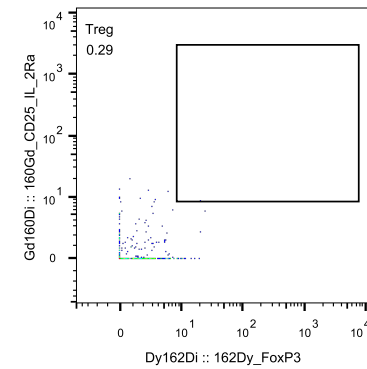

3551\_T102.fcs  
CD4+  
341

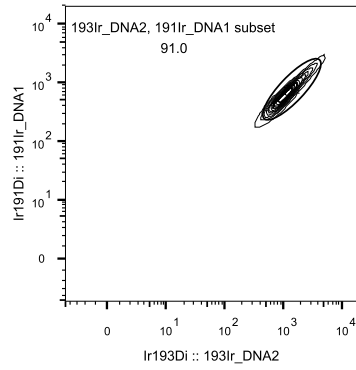

3696\_T104.fcs  
Ungated  
131464

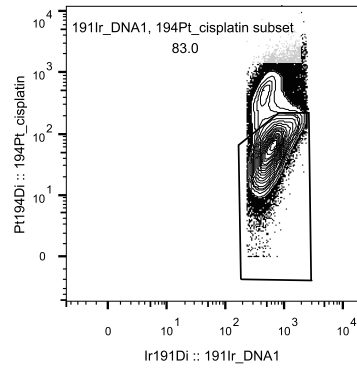

3696\_T104.fcs  
193Ir\_DNA2, 191Ir\_DNA1 subset  
119654

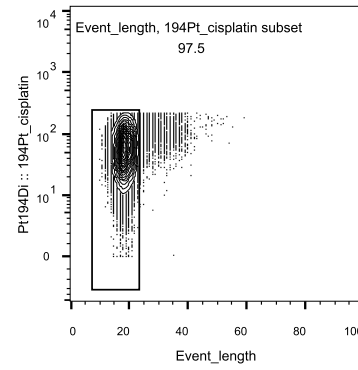

3696\_T104.fcs  
191Ir\_DNA1, 194Pt\_cisplatin subset  
99311

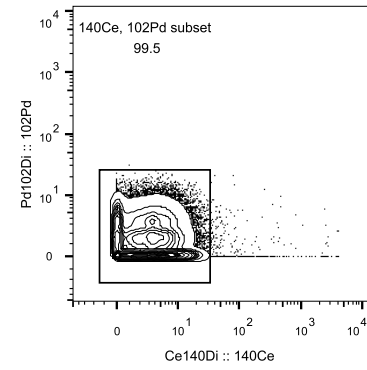

3696\_T104.fcs  
Event\_length, 194Pt\_cisplatin subset  
96813

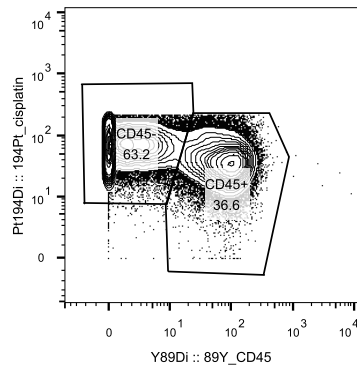

3696\_T104.fcs  
140Ce, 102Pd subset  
96368

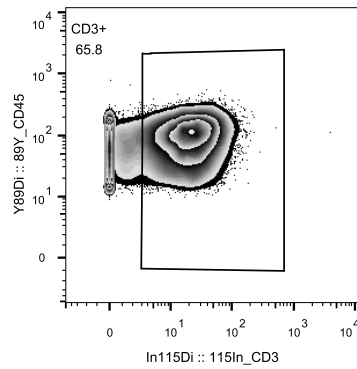

3696\_T104.fcs  
CD45+  
35309

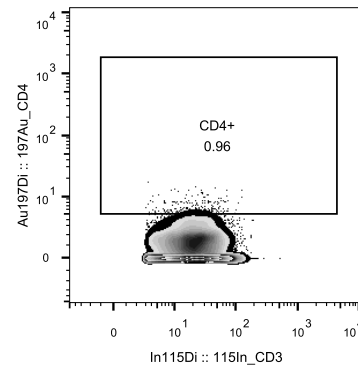

3696\_T104.fcs  
CD3+  
23238

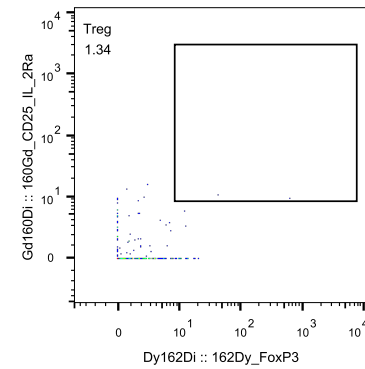

3696\_T104.fcs  
CD4+  
224



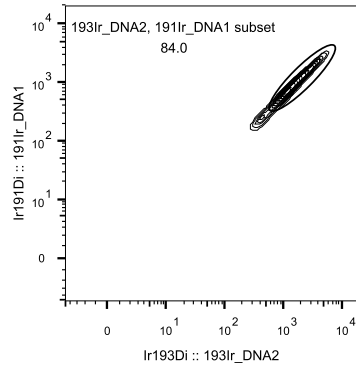

3775\_T105.fcs  
Ungated  
249601

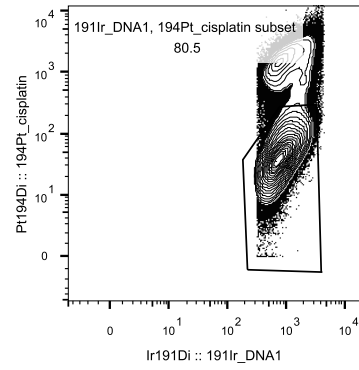

3775\_T105.fcs  
193Ir\_DNA2, 191Ir\_DNA1 subset  
209678

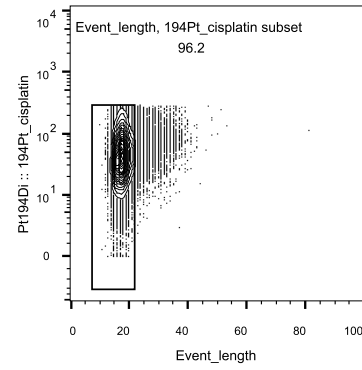

3775\_T105.fcs  
191Ir\_DNA1, 194Pt\_cisplatin subset  
168844

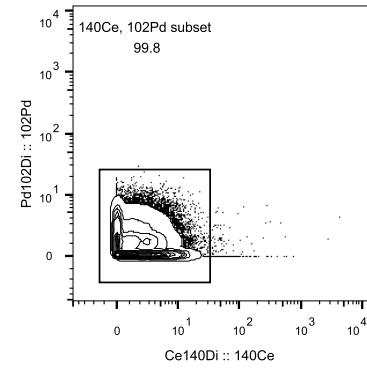

3775\_T105.fcs  
Event\_length, 194Pt\_cisplatin subset  
162506

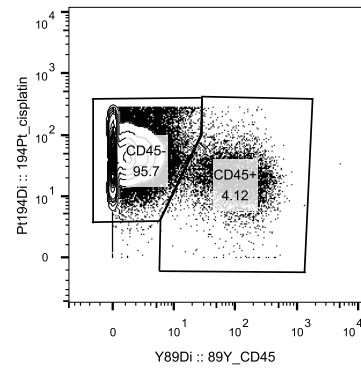

3775\_T105.fcs  
140Ce, 102Pd subset  
162180

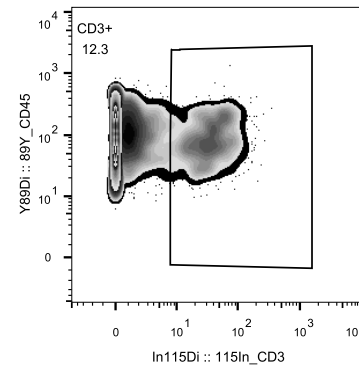

3775\_T105.fcs  
CD45+  
6687

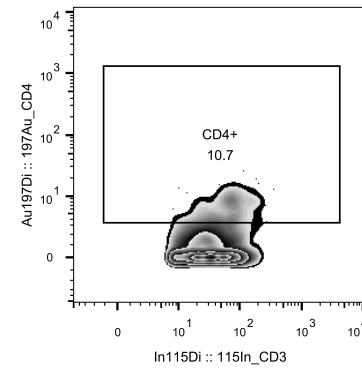

3775\_T105.fcs  
CD3+  
822

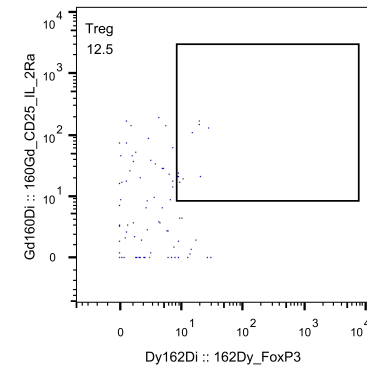

3775\_T105.fcs  
CD4+  
88.0

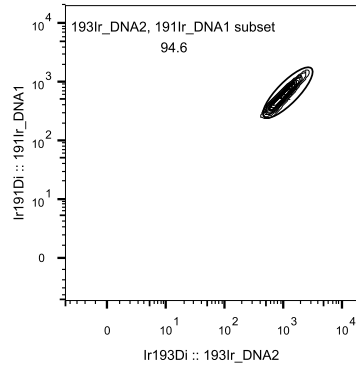

3775\_T106.fcs  
Ungated  
224175

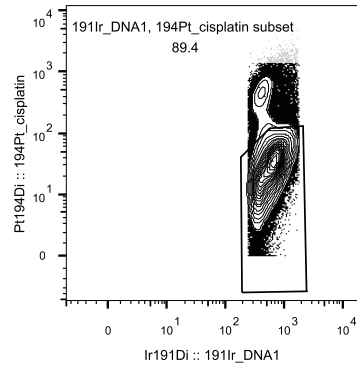

3775\_T106.fcs  
193Ir\_DNA2, 191Ir\_DNA1 subset  
212003

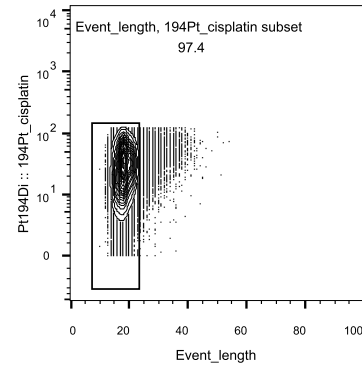

3775\_T106.fcs  
191Ir\_DNA1, 194Pt\_cisplatin subset  
189444

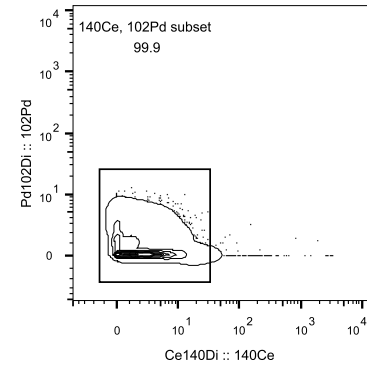

3775\_T106.fcs  
Event\_length, 194Pt\_cisplatin subset  
184468

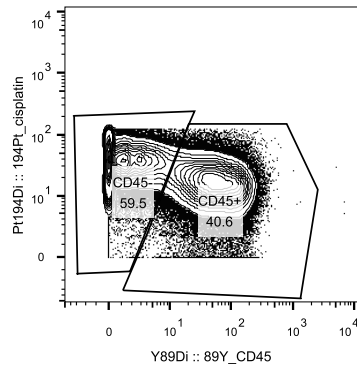

3775\_T106.fcs  
140Ce, 102Pd subset  
184288

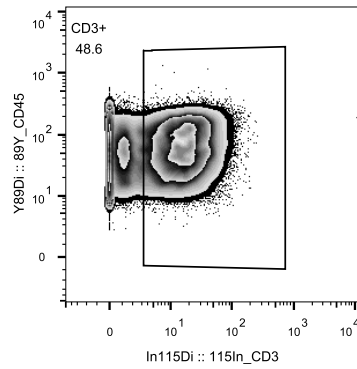

3775\_T106.fcs  
CD45+  
74812

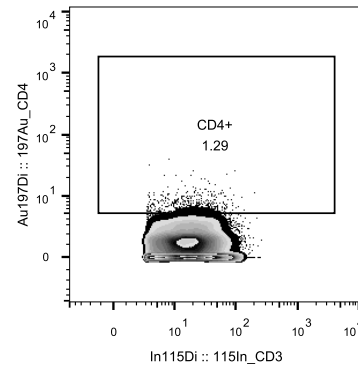

3775\_T106.fcs  
CD3+  
36344

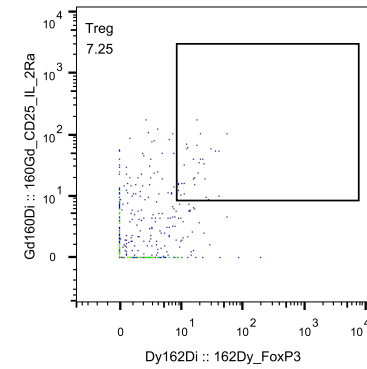

3775\_T106.fcs  
CD4+  
469

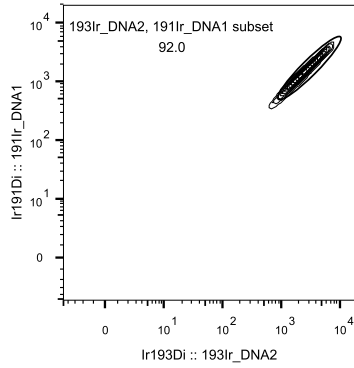

3775\_T107.fcs  
Ungated  
182954

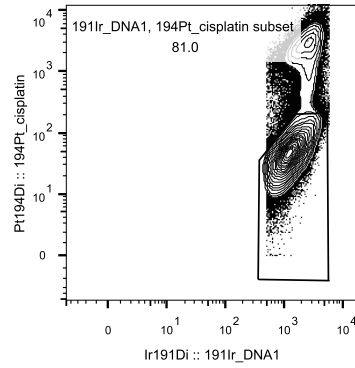

3775\_T107.fcs  
193Ir\_DNA2, 191Ir\_DNA1 subset  
168372

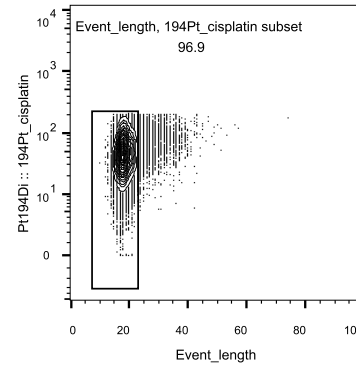

3775\_T107.fcs  
191Ir\_DNA1, 194Pt\_cisplatin subset  
136428

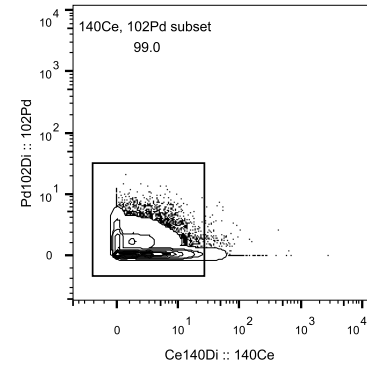

3775\_T107.fcs  
Event\_length, 194Pt\_cisplatin subset  
132203

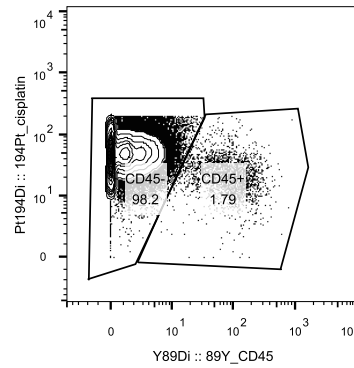

3775\_T107.fcs  
140Ce, 102Pd subset  
130856

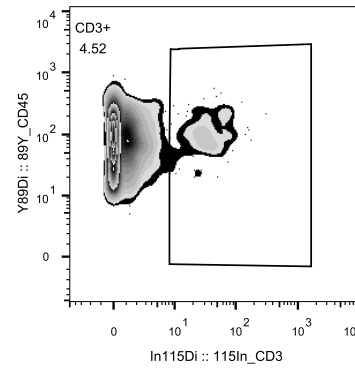

3775\_T107.fcs  
CD45+  
2347

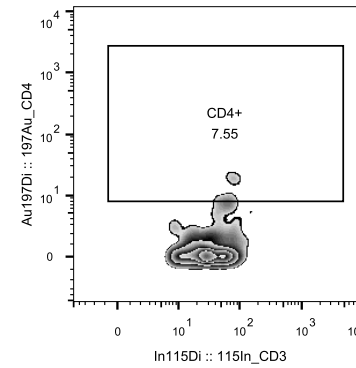

3775\_T107.fcs  
CD3+  
106

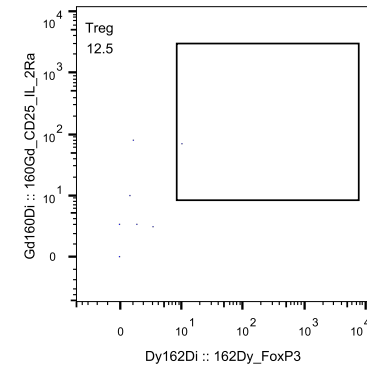

3775\_T107.fcs  
CD4+  
8.00

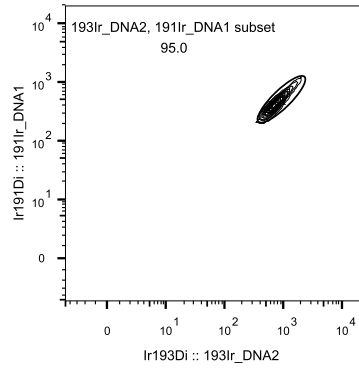

3775\_T110.fcs  
Ungated  
5.24E5

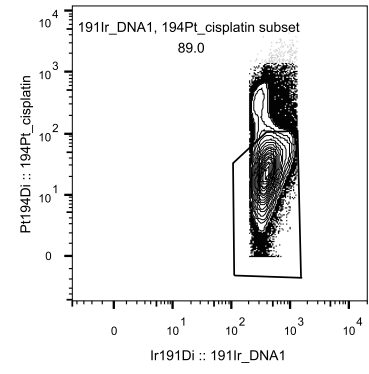

3775\_T110.fcs  
193lr\_DNA2, 191lr\_DNA1 subset  
4.98E5

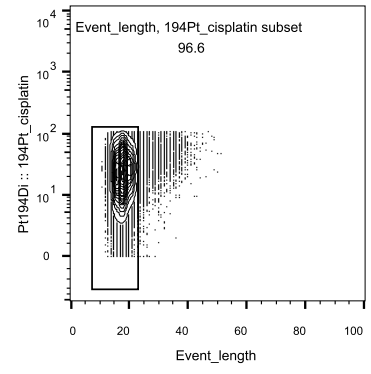

3775\_T110.fcs  
191lr\_DNA1, 194Pt\_cisplatin subset  
4.43E5

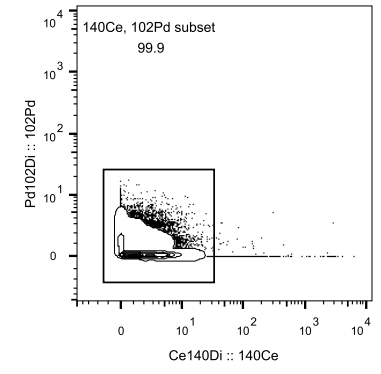

3775\_T110.fcs  
Event\_length, 194Pt\_cisplatin subset  
4.28E5

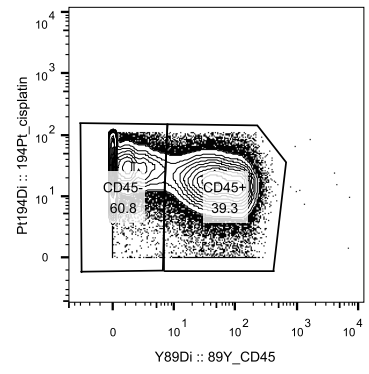

3775\_T110.fcs  
140Ce, 102Pd subset  
4.28E5

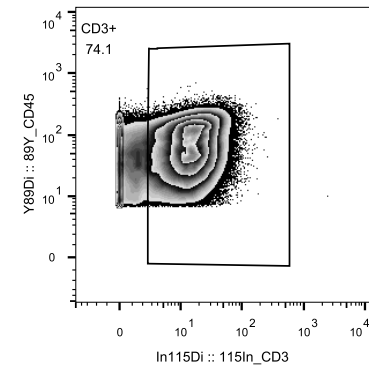

3775\_T110.fcs  
CD45+  
168234

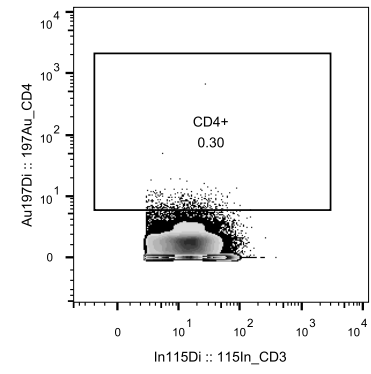

3775\_T110.fcs  
CD3+  
124721

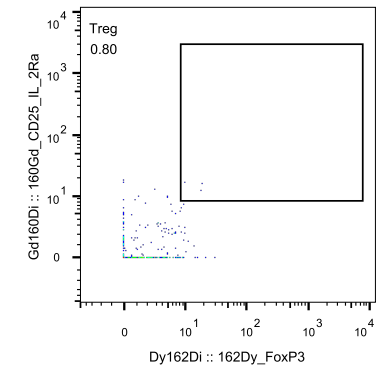

3775\_T110.fcs  
CD4+  
376

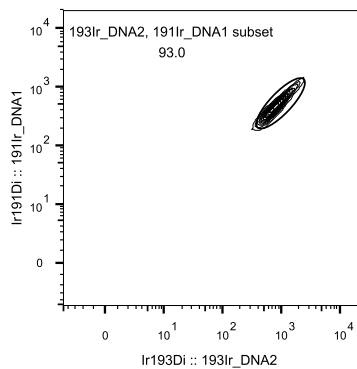

3776\_T108.fcs  
Ungated  
5.76E5

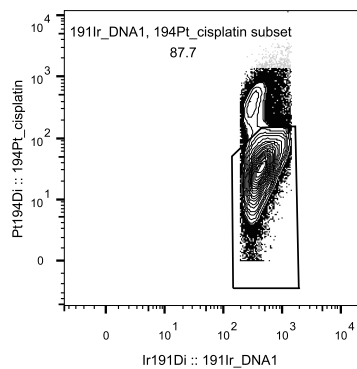

3776\_T108.fcs  
193Ir\_DNA2, 191Ir\_DNA1 subset  
5.36E5

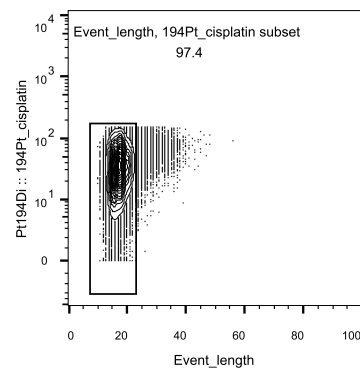

3776\_T108.fcs  
191Ir\_DNA1, 194Pt\_cisplatin subset  
4.70E5

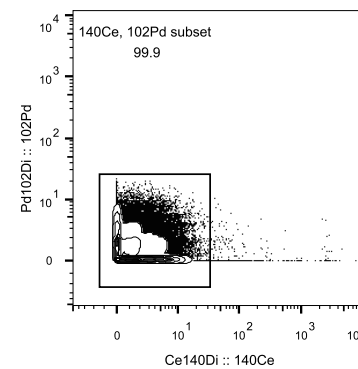

3776\_T108.fcs  
Event\_length, 194Pt\_cisplatin subset  
4.57E5

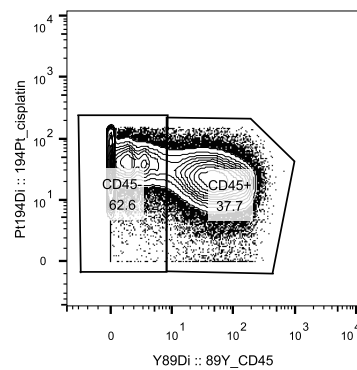

3776\_T108.fcs  
140Ce, 102Pd subset  
4.57E5

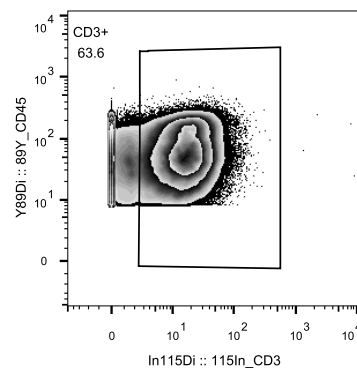

3776\_T108.fcs  
CD45+  
172151

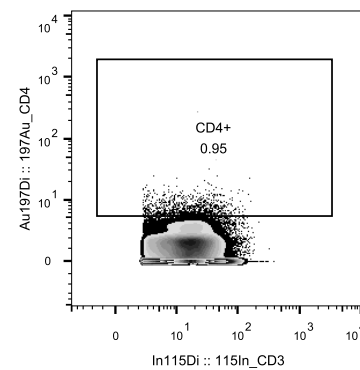

3776\_T108.fcs  
CD3+  
109543

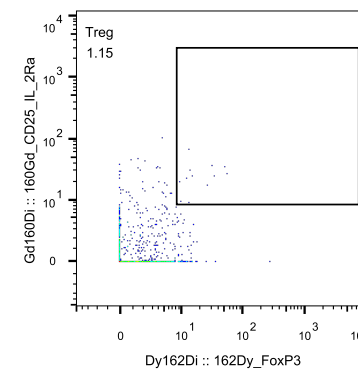

3776\_T108.fcs  
CD4+  
1040

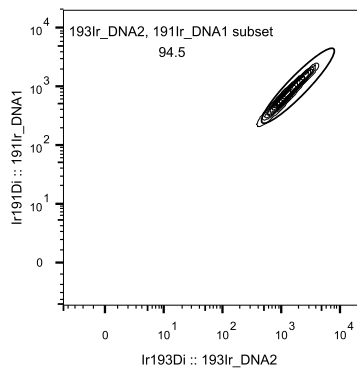

3776\_T109.fcs  
Ungated  
366901

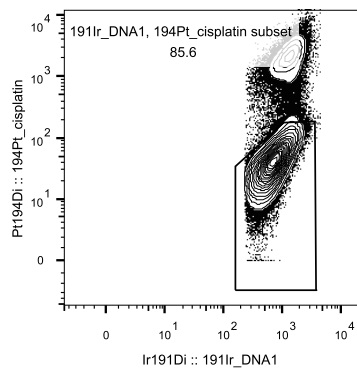

3776\_T109.fcs  
193Ir\_DNA2, 191Ir\_DNA1 subset  
346858

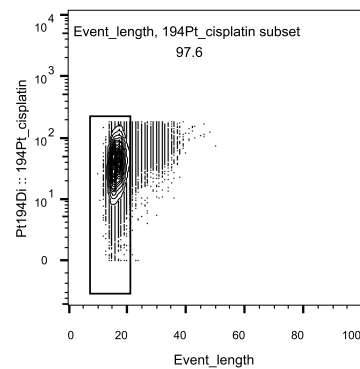

3776\_T109.fcs  
191Ir\_DNA1, 194Pt\_cisplatin subset  
296908

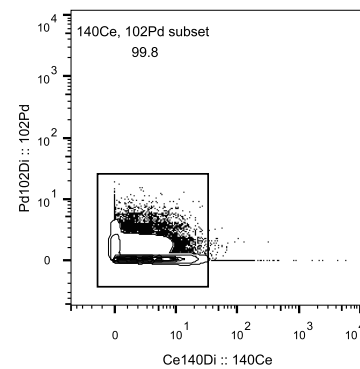

3776\_T109.fcs  
Event\_length, 194Pt\_cisplatin subset  
289772

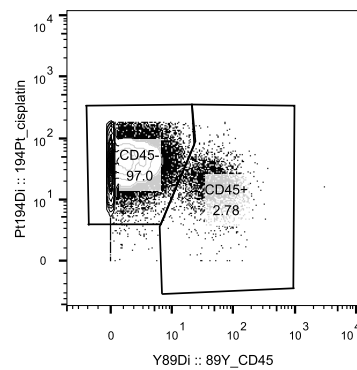

3776\_T109.fcs  
140Ce, 102Pd subset  
289118

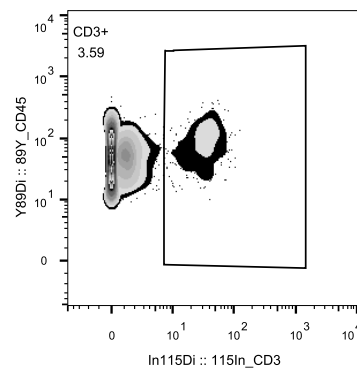

3776\_T109.fcs  
CD45+  
8041

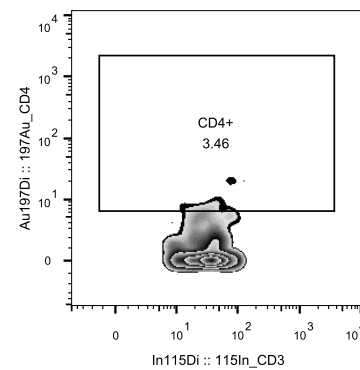

3776\_T109.fcs  
CD3+  
289

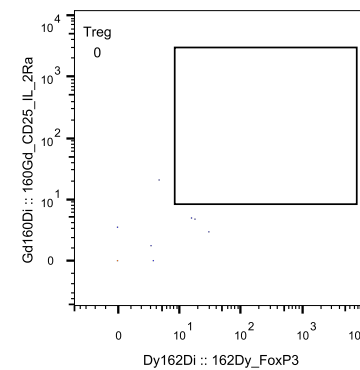

3776\_T109.fcs  
CD4+  
10.0
